# Supplementary material for: A nomogram model for predicting lower extremity deep vein thrombosis after gynecologic laparoscopic surgery: a retrospective cohort study
Source: PeerJ journal article supplement (doi:10.7717/peerj.16089), 2023-09-21
Supplement: raw_data.xlsx [file raw_data.xlsx]

## Sheet: Sheet1
DVT（0—1）	Age	Weight	Height	BMI	Hypertension	Diabete	History of varicose veins	OT	Pneumoperitoneum pressure value	Neutrophil count	Lymphocyte count	white blood cell count	platelet count	Pct	HGB	hematocrit	International standardized ratio	triglyceride	APTT	thrombin time	DD	High-density lipoprotein cholesterol	Low density lipoprotein cholesterol	apoA1	apoB	CA125	CA199	CA153	CEA	AFP	SCC	HE4	PRE_3	RES_3
DVTgroup	45	62.9	1.68	22.29	No	No	No	246	15	2.55	1.06	4.3	519	0.24	81	27.7	0.95	1.16	25.3	16.2	0.23	1.05	285	0.89	0.82	13.8	9.31	7.3	1.07	4.63	7.9	29.38	0.18843	0.81157
DVTgroup	46	72.6	1.6	28.36	No	No	No	152	14	5.7	1.74	8.19	382	0.36	152	45.5	1.05	0.94	29.3	17.3	0.17	1.27	3.76	1.1	0.9	29.6	8.6	10.62	1.6	5.1	0.58	37.81	0.01969	0.98031
DVTgroup	52	57.8	1.53	24.69	No	No	No	98	13	2.38	2.54	5.72	203	0.21	124	36.8	0.84	2.53	23.3	17.1	0.15	1.26	4.12	1.2	1.21	432.9	4.6	6.4	0.62	4.5	0.9	29.46	0.10542	0.89458
DVTgroup	48	59.9	1.63	22.55	No	No	No	125	13	1.7	1.68	3.95	203	0.21	120	36.8	0.95	1.53	22.5	16.8	0.42	1.36	5.16	1.12	1.45	15.3	7.32	4.7	1.18	3.61	1	56.78	0.10615	0.89385
DVTgroup	59	60	1.58	24.03	No	No	No	97	14	2.45	1.79	4.93	230	0.25	139	41.1	0.93	2.22	25.9	17.4	1.26	1.28	3.19	1.21	1.05	38.5	27.05	5.3	3.37	1.48	1	51.11	0.17486	0.82514
DVTgroup	58	52	1.51	22.81	Yes	No	No	146	14	3.1	1.25	4.83	414	0.26	126	40.7	0.92	1.56	22.4	17.4	0.54	1.49	3.87	1.18	1.08	44.3	118.62	12.2	4.62	2.66	0.5	40.27	0.52347	0.47653
DVTgroup	55	75.3	1.6	29.41	Yes	Yes	No	85	14	2.92	2.77	6.19	272	0.34	107	32.6	0.92	1.56	27.4	16.3	0.3	1.27	1.7	1.07	0.64	48	4.6	5.9	1.6	6.5	0.69	84.51	0.09528	0.90472
DVTgroup	58	49.3	1.5	21.91	Yes	Yes	No	160	14	6.07	2.65	9.33	345	0.33	147	43.8	0.91	2.52	23.9	17.5	0.59	1.28	3.79	1.17	1.23	11.8	30.41	4.1	0.59	4.9	0.8	53.67	0.49511	0.50489
DVTgroup	54	52.9	1.55	22.02	No	No	No	241	13	3.86	1.95	6.45	198	0.23	139	40.7	0.85	1.62	24.8	17.5	0.16	1.17	3.01	1	0.97	7.9	6.94	16	5.05	2.19	0.84	53.65	0.49858	0.50142
DVTgroup	54	60	1.59	23.73	No	No	No	405	15	2.27	1.82	4.47	265	0.25	128	37.7	0.9	0.86	25.1	18.8	0.46	1.41	2.84	1.15	0.86	13.39	27.9	5.1	2.12	1.34	0.58	61.05	0.83213	0.16787
DVTgroup	66	53.5	1.57	21.7	Yes	No	No	212	14	2.78	1.76	5.83	223	0.24	129	36.8	0.92	1.42	24.8	16.7	1.13	1.33	2.53	1.15	0.76	33.7	2.06	3.5	2.37	1.5	0.68	185.9	0.95417	0.04583
DVTgroup	47	53.5	1.59	21.16	Yes	No	No	52	13	9.42	0.7	11.44	604	0.35	131	40.2	1.05	1.31	29.2	15.9	2.33	1.05	2.45	0.85	0.95	3676	119	146.7	1.93	1.66	0.5	67.58	0.93643	0.06357
DVTgroup	59	66.3	1.66	24.06	Yes	No	No	88	14	3.06	2.46	6.1	224	0.24	132	42.1	0.98	1.53	28.7	17.3	0.9	1.35	4.08	1.22	1.17	35.65		4.6	1.32	2.6	1	85.51	0.19864	0.80136
DVTgroup	46	53	1.6	20.7	Yes	No	No	128	14	2.83	1.39	4.77	245	0.22	115	34.3	0.89	0.58	24.4	16.5	0.2	1.05	2.46	1.02	0.75	30.6	5.23	17.4	0.69	1.99	0.8	17.58	0.11157	0.88843
DVTgroup	62	56.7	1.65	20.83	Yes	No	No	160	14	1.68	0.66	2.69	145	0.14	118	38.1	0.88	0.87	28.8	17.8	0.97	1.38	2.83	1.17	0.86	31.52	18.62	5.1	0.64	5.2	0.57	37.81	0.44456	0.55544
DVTgroup	48	63.7	1.62	24.27	No	No	No	179	14	4.34	1.76	6.71	307	0.28	98	31.6	0.96	0.97	26.6	16.9	0.14	1.49	2.57	1.14	0.8	11	10.65	6.4	1.5	4.1	0.84	29.46	0.04154	0.95846
DVTgroup	45	68	1.65	24.98	No	No	No	187	14	4.81	1.95	7.65	302	0.29	138	41	0.94	1.21	26.5	18.2	0.38	1.23	3.57	1.07	0.97	7.7	4.6	4.9	1.8	2.6	0.67	58.68	0.07011	0.92989
DVTgroup	51	61.2	1.56	25.15	No	No	No	175	14	2.92	1.4	4.81	369	0.35	99	34	0.92	0.9	27.7	17.9	0.41	1.44	4.01	1.14	1.14	44.5	2	7.6	1.84	2.55	0.57	63.7	0.06173	0.93827
DVTgroup	40	59	1.57	23.94	No	No	No	285	15	4.08	2.14	6.88	259	0.28	120	35.8	0.89	1.35	24.8	16.4	0.4	1.24	3.91	1	1.04	9.5	233	8.4	4.74	1.39	3.1	44.77	0.23275	0.76725
DVTgroup	63	59.5	1.5	26.44	Yes	Yes	Yes	455	15	2.48	1.33	4.18	136	0.15	119	39.8	0.96	1.29	23.8	16.7	1.07	1.03	2.54	0.99	0.83	441	15.69	16	4.2	3.5	1.68	293.65	0.99976	0.00024
DVTgroup	44	54	1.6	21.09	No	No	No	160	14	2.37	1.45	4.26	368	0.34	96	32.3	0.93	1.35	23.9	17.5	2.17	1.04	2.88	0.94	0.88	49.8	20.3	11.3	1.04	1.55	0.67	68.98	0.68187	0.31813
DVTgroup	37	74.4	1.67	26.68	No	No	No	323	14	4.6	2.42	7.7	261	0.28	123	37.3	0.9	2.27	26	16.1	0.59	1.19	4.86	1.08	1.17	48	16.31	7.4	1.41	1.57	0.54	26.1	0.26238	0.73762
DVTgroup	60	68.3	1.52	29.56	No	No	No	340	15	3.26	2.62	6.52	244	0.24	139	40.9	0.82	5.29	23.8	18.1	0.12	1.1	4.7	1.08	1.34	22.3	5.89	6.7	1.23	4.67	0.4	97.75	0.73418	0.26582
DVTgroup	38	55	1.62	20.96	No	No	No	175	14	3.67	1.13	5.48	260	0.28	126	37.2	0.85	0.66	26.2	16.5	0.31	1.32	1.86	1.04	0.6	62.1	2	6.5	0.83	2.69	0.8	76.74	0.04164	0.95836
DVTgroup	56	60	1.59	23.73	Yes	No	No	179	14	6.26	2.26	9.44	331	0.32	140	41.8	0.95	1.85	26	17.9	1.1	1.1	3.69	1.05	1.13	20.2	5.03	7.1	2.54	1.29	1.9	53.95	0.64978	0.35022
DVTgroup	58	48.4	1.58	19.39	No	No	No	192	14	1.28	1.41	3.21	286	0.27	128	37.9	0.95	1.11	29.8	16.9	0.45	1.47	2.25	1.25	0.72	109.7	32.61	1.6	1.5	1.5	0.6	37.81	0.06714	0.93286
DVTgroup	46	58	1.61	22.38	No	No	No	120	14	5.82	1.77	8.52	357	0.34	92	32.4	1.05	1.17	22.4	15.4	3.64	1.1	2.54	0.99	0.83	145	30.69	4.5	4.9	5.3	0.82	29.46	0.96653	0.03347
DVTgroup	52	57.8	1.56	23.75	No	No	No	180	14	2.67	0.87	3.97	379	0.38	112	34.9	0.92	2.44	25.9	15.4	3.6	0.72	5.31	0.78	1.65	2562	79.35	189.6	2.63	2.12	1	572.49	0.9998	0.0002
DVTgroup	50	55.8	1.48	25.47	Yes	No	No	114	13	4.93	1.06	6.51	418	0.39	73	27.3	0.87	0.83	17.5	17.3	0.39	1.68	2.86	1.39	0.85	12.5	7.36	10.1	1.05	2.24	1.9	37.81	0.6401	0.3599
DVTgroup	50	66.7	1.6	26.05	No	Yes	No	219	15	4.4	2.41	7.36	332	0.34	119	35.9	0.8	1.11	21.8	16.8	0.16	1.36	2.99	1.17	0.85	4.6	2	12.7	1.99	1.7	0.3	29.46	0.44874	0.55126
DVTgroup	48	58	1.6	22.66	No	No	No	115	13	2.2	1.83	4.49	285	0.3	89	31	1.05	0.47	20.6	17.6	1.03	1.38	2.92	1.04	0.83	86.5	2	9.6	1.29	2.91	0.34	98.68	0.54222	0.45778
DVTgroup	49	70.3	1.54	29.64	No	No	No	334	14	4.03	1.16	5.74	276	0.29	82	29	0.94	1.93	22.3	22.3	0.09	1.43	1.8	1.3	0.62	20.2	582	7.5	0.71	1.56	0.7	69.84	0.47809	0.52191
DVTgroup	58	63.5	1.55	26.43	No	No	Yes	180	13	1.9	2.21	4.6	245	0.26	121	35.4	0.98	1.35	26.5	17.8	0.95	1.09	3.1	0.99	0.82	26.3	5.28	13.1	1.01	2.1	0.62	84.69	0.78801	0.21199
DVTgroup	56	65.2	1.6	25.47	Yes	No	No	181	14	3.1	2.04	5.64	308	0.27	145	44	0.78	5.11	17.3	17.2	1.29	1.08	3.16	1.09	1.29	16.3	2	9.2	2.32	3.74	0.8	47.69	0.9609	0.0391
DVTgroup	37	66.4	1.56	27.28	Yes	No	No	166	14	2.23	2.22	5.58	260	0.24	124	36.8	0.99	0.57	21	15.8	0.56	1.86	2.57	1.25	0.77	13.4	244.07	4.7	0.61	3.13	0.71	33.16	0.50235	0.49765
DVTgroup	47	85	1.64	31.6	No	No	No	200	15	4.72	1.69	7.06	334	0.32	74	26.8	0.95	0.97	22	15.9	0.24	1.2	2.41	1.08	0.76	19.5	2	15	1.22	2.54	0.8	37.6	0.27771	0.72229
DVTgroup	56	68.6	1.61	26.47	Yes	No	No	255	14	4.4	2.44	7.42	260	0.29	133	38.9	0.93	0.76	25.1	17.2	0.15	1.1	1.89	0.89	0.6	15.2	2	12.9	2.38	2.12	1.4	47.16	0.67308	0.32692
DVTgroup	33	54	1.63	20.32	No	No	No	78	14	3.04	1.1	4.41	213	0.22	125	36.8	0.98	0.5	25.3	17.5	0.08	1.84	2.3	1.26	0.7	11.3	10.65	4.9	5.6	1.5	0.58	75.69	0.00487	0.99513
DVTgroup	47	53	1.58	21.23	No	No	No	180	14	3.31	1.9	5.6	227	0.23	97	30.6	1.02	1.04	25.9	17.2	0.34	1.6	2.27	1.26	0.7	19.8	4.64	4	1.5	2.1	0.24	64.58	0.06254	0.93746
DVTgroup	64	44.7	1.6	17.46	No	No	No	372	14	2.73	1.02	4.31	192	0.19	118	35.3	0.96	0.52	27.4	16.9	1.3	1.93	2.5	1.35	0.7	61.1	2	45.6	1.53	2.13	1.3	45.7	0.92433	0.07567
DVTgroup	51	67.2	1.54	28.34	Yes	No	No	249	14	6.15	1.3	7.89	344	0.32	109	35.6	0.89	1.96	22.6	17.2	0.09	1.09	2.65	1.02	0.87	25.9	47.08	25.2	3.97	1.84	0.4	64.52	0.61624	0.38376
DVTgroup	48	59	1.6	23.05	Yes	No	No	292	15	2.18	2.12	4.83	294	0.32	124	36.8	0.94	1.14	23.9	18.4	4.22	1.06	3.17	0.97	0.82	542.9	39.68	15.62	3.2	1.5	1.5	37.31	0.99948	0.00052
DVTgroup	50	53	1.6	20.7	No	No	No	190	14	5.44	1.15	7.06	263	0.27	113	36.5	0.94	0.64	26.9	17.7	0.19	1.35	2.04	1.14	0.5	35.6	13.03	11.1	0.65	2.03	0.54	36.84	0.05688	0.94312
DVTgroup	68	57	1.65	20.94	Yes	No	No	218	14	1.44	1.89	3.8	208	0.21	119	35.8	0.92	0.85	25	17.5	0.35	1.47	5.45	1.25	1.31	10	2.93	23.4	1.65	2.2	0.7	26.64	0.71818	0.28182
DVTgroup	48	69.3	1.63	26.08	No	No	No	348	14	3.15	2.27	6.2	333	0.32	134	39.9	0.91	1.67	22.4	17.3	0.22	1.79	3.6	1.5	1.06	14.5	2	6.8	1.81	1.31	0.7	44.24	0.50342	0.49658
DVTgroup	51	46	1.5	20.44	No	No	No	156	14	1.19	1.33	2.81	188	0.21	127	38.9	1.06	0.7	29.4	17.6	1.64	1.95	2.62	1.27	0.68	8.9		5.6	0.62	1.65	0.57	39.84	0.14791	0.85209
DVTgroup	45	52.2	1.51	22.89	No	No	No	504	15	2.98	2.66	6.75	333	0.3	118	36.2	0.9	1.11	24.8	17.1	0.93	1.73	2.72	1.4	0.78	62.5	33.1	27.9	0.86	1.5	0.69	32.65	0.94895	0.05105
DVTgroup	49	59	1.62	22.48	No	No	No	350	14	2.19	2.08	4.77	231	0.22	108	32.2	0.95	0.52	24	16.7	0.97	1.01	2.41	1.1	0.71	8.3	4.45	4.9	3.8	2.24	1.2	45.59	0.71522	0.28478
DVTgroup	49	58.1	1.55	24.18	No	No	No	315	14	4.12	1.77	6.48	191	0.19	129	37.7	0.91	0.75	24.5	18	3.21	1.38	3.83	1.07	1.03	23.8	2	6	1.03	2.49	4.4	26.99	0.99213	0.00787
DVTgroup	52	57.9	1.6	22.62	No	No	No	219	15	2.82	0.96	4.37	303	0.29	113	35.7	0.85	1.34	28	19.3	0.52	1.73	4	1.36	1.1	10.3	9.02	11.3	1.11	2.24	0.5	36.43	0.08704	0.91296
DVTgroup	45	70	1.64	26.03	No	No	No	175	14	2.34	1.59	4.73	376	0.35	66	25.1	0.92	1.29	22.6	17.1	1.29	0.9	2.27	0.86	0.73	8.8	3.95	9.5	1.2	2.4
DVTgroup	43	52	1.62	19.81	No	No	No	175	14	3.09	1.41	5	350	0.34	92	30.1	0.95	1.17	26.2	16.5	1.16	1.13	2.6	1.02	0.72	158.5	4.13	5	1.89	1.94	0.6	25.48	0.16167	0.83833
Non-DVT group	38	57	1.77	18.19	No	No	No	96	14	1.85	2.28	3.97	266	0.25	142	41.4	0.96	0.62	28.9	17	0.07	1.68	3.2	1.24	0.81	12.1	3.69	4.7	0.81	4.71	0.7	9.9	0.00284	-0.00284
Non-DVT group	27	52	1.65	19.1	No	No	No	93	14	2.27	2.31	4.06	284	0.23	128	37.8	0.84	0.83	31.1	17	0.19	1.24	4.31	0.99	1.06	6.1	7.9	11.1	1.69	1.12
Non-DVT group	45	47.5	1.5	21.11	Yes	No	No	162	14	5.76	1.6	8.4	234	0.24	133	39.6	0.9	0.53	30.6	17.3	0.24	1.84	2.9	1.34	0.75	16.6	4.6	11.1	1.73	2.21	1.5	26.98	0.02241	-0.02241
Non-DVT group	40	53.3	1.55	22.19	No	No	No	80	14	4.6	2.02	7.7	332	0.32	130	38.8	1.02	1.35	27.7	16.8	0.15	1.9	3.98	1.38	1.04	6.5	6.4	5.4	0.98	2.5	0.51	26.1	0.00256	-0.00256
Non-DVT group	35	50.4	1.57	20.45	No	No	No	143	14	4.41	2.03	7.85	188	0.22	137	39.2	0.9	1.13	30.1	16.2	0.18	0.91	3.03	0.84	0.85	7.8	2	6.8	0.64	3.5	0.57	36.84	0.00527	-0.00527
Non-DVT group	29	51	1.56	20.96	No	No	No	110	14	5.55	1.94	8.01	135	0.19	110	33.3	0.98	1.78	25.8	16.3	0.2	1.94	1.55	1.58	0.51	15.4	15.64	4.6	0.84	1.4	0.7	64.88	0.00256	-0.00256
Non-DVT group	38	52.9	1.62	20.16	No	No	No	88	14	3.31	2.18	7.54	306	0.29	143	41.3	0.94	0.84	27.3	17.5	0.13	1	2.97	0.89	0.81	9.5	9.4	5.2	1.65	6.5	0.9	31.69	0.00606	-0.00606
Non-DVT group	32	53.4	1.54	22.52	No	No	No	57	14	1.61	1.39	4.5	345	0.33	143	40.9	0.93	1.17	32.3	20.2	0.2	1.61	3.36	1.26	0.88	15.9	4.16	3.6	1.16	2.71	0.8	30.83	0.00034	-0.00034
Non-DVT group	36	51.8	1.55	21.56	No	No	No	102	14	2.83	2.15	4.84	343	0.31	107	35	0.9	1.24	25.8	16.3	0.1	1.09	4.55	0.97	1.2	10.6	10.69	4.6	2.62	2.51	0.9	69.24	0.00879	-0.00879
Non-DVT group	32	52	1.66	18.87	No	No	No	75	14	2.77	1.15	4.93	325	0.3	59	22.1	1.06	1	25.6	17	0.29	1.38	2.82	1.09	0.74	21.3	2.29	4.2	1.64	2.65	1	38.85	0.00551	-0.00551
Non-DVT group	44	62.7	1.5	27.87	Yes	No	No	148	14	3.45	2.73	5.7	250	0.27	143	37.9	0.97	0.8	23.7	16.6	0.27	1.32	2.79	1.13	0.72	16.4	10.64	6.8	1.25	3.1	1.1	24.08	0.11491	-0.11491
Non-DVT group	42	59	1.6	23.05	No	No	No	178	14	2.8	0.72	5.19	232	0.22	155	42.9	0.94	1.71	27.4	18.1	0.3	1.21	3.9	1.15	1.07	6.1	22.63	5.6	1.43	1.48	0.58	35.64	0.02311	-0.02311
Non-DVT group	47	55	1.6	21.48	Yes	No	No	65	14	2.63	1.56	5.21	233	0.23	124	36.1	0.99	1.33	29.5	17.5	0.12	1.42	2.98	1.08	0.77	7.8	5.4	9.4	0.65	1.54	0.98	26.94	0.01271	-0.01271
Non-DVT group	33	47	1.56	19.31	No	No	No	45	14	7.69	1.82	10.21	249	0.24	132	38.1	0.88	2.5	30.9	17.1	0.16	1.71	2.24	1.12	0.61	11.3	3.98	22.9	1.52	1.09	2.6	21.55	0.00061	-0.00061
Non-DVT group	51	54.6	1.5	24.27	No	No	No	70	14	3.26	1.95	4.93	439	0.43	134	38.9	0.85	0.97	30.7	10.3	0.17	1.27	3.83	1.03	0.97	21.3	22.61	15.62	4.8	1.54	1.4	39.33	0.00394	-0.00394
Non-DVT group	50	55	1.58	22.03	No	No	No	95	14	2.76	1.9	5.02	162	0.19	122	36.8	1.08	2.97	28.9	19.1	0.13	2.01	3.2	1.4	0.8	23.35	37.29	33.32	1	1.98	1.4	24.86	0.00541	-0.00541
Non-DVT group	42	73.2	1.62	27.89	No	No	No	40	14	1.93	1.69	3.59	268	0.24	122	36.8	0.93	1.24	28.5	16.5	0.36	1.14	1.94	1.07	0.58	17.6	36.1	8	1.72	1.76	0.67	29.84	0.00297	-0.00297
Non-DVT group	49	61	1.6	23.83	No	No	No	125	14	2.26	2.26	4.4	402	0.4	128	36.5	0.87	2.25	25.5	15.1	0.76	1.75	4.63	1.34	1.17	10.6	10.64	5.1	2.13	2.5	0.48	61.49	0.06479	-0.06479
Non-DVT group	32	57	1.59	22.55	Yes	No	No	85	14	2.8	2.18	5.95	256	0.25	148	43.2	0.85	1.4	27.8	15.9	0.25	1.41	2.37	1.14	0.67	15.8	21.39	15.6	1.74	3.65	0.3	69.59	0.01069	-0.01069
Non-DVT group	36	41.7	1.52	18.05	No	No	No	80	14	2.97	1.49	5.97	234	0.23	135	40.4	0.83	1.83	29.2	17.5	0.18	1.97	2.49	1.32	0.64	15.6		10.32	1.57	2.51	0.51	64.58	0.00197	-0.00197
Non-DVT group	35	56	1.67	20.08	No	No	No	140	14	3.66	1.77	6.5	217	0.27	133	39.1	0.9	1.53	29.2	17.8	0.23	1.25	3.33	1.03	0.86	29.2	4.6	4.8	0.92	2.19	0.8	39.94	0.00661	-0.00661
Non-DVT group	50	66.5	1.5	29.56	No	No	No	225	14	3.45	1.58	6.22	340	0.32	136	40.7	0.82	1.61	30.6	18.1	0.33	1.04	4.64	0.94	1.2	26.5	5.7	7.6	1.51	2.4	0.7	21.16	0.03727	-0.03727
Non-DVT group	48	43.6	1.52	18.87	No	No	No	218	14	4.26	1.62	6.41	239	0.23	113	33.2	0.8	1.25	23.2	17	0.15	1.81	3.38	1.4	0.88	20.14	7.36	4.9	1	1.51	0.69	35.64	0.10948	-0.10948
Non-DVT group	47	55	1.57	22.31	No	No	No	138	14	5.08	1.46	7.67	468	0.57	80	25.4	0.97	0.56	23.4	14.7	0.26	1.07	5.27	0.91	1.32	70.9	10.65	5.8	1.72	2.51	0.57	34.62	0.08166	-0.08166
Non-DVT group	34	57.5	1.62	21.91	No	No	No	83	14	4.48	1.88	6.98	310	0.28	143	43.3	1.1	1.42	29.1	16.7	0.09	1.57	5.36	1.17	1.32	12.7	11.6	4.3	2.13	1.38	0.68	45.52	0.00176	-0.00176
Non-DVT group	47	55.3	1.54	23.32	No	No	No	125	14	1.34	1.08	3.63	272	0.29	135	39.2	0.89	1.13	26.8	17.7	0.24	1.31	2.24	1.11	0.65	31.59	11.63	6.7	1.74	2.4	0.48	39.33	0.01875	-0.01875
Non-DVT group	41	53.5	1.58	21.41	No	No	No	102	14	2.87	2.37	5.51	298	0.31	118	34.4	0.84	1.02	25.3	16.9	0.15	1.13	3.61	0.98	0.93	2.9	2.48	11.9	1.57	2.53	0.67	24.86	0.01295	-0.01295
Non-DVT group	31	48	1.55	19.98	No	No	No	95	14	1.79	1.56	3.45	286	0.26	117	35.5	0.9	1.33	27.7	17	2.77	1.15	4.11	0.95	1.04	17.2	15.64	4.9	1	3.4	3.6	39.33	0.17005	-0.17005
Non-DVT group	29	61.1	1.74	20.18	No	No	No	61	14	3.52	2.02	6.43	251	0.26	138	40.1	0.93	0.95	28.9	17.9	0.07	1.51	3.38	1.18	0.8	15.84	4.27	8.5	1.72	2.5	0.62	24.86	0.00091	-0.00091
Non-DVT group	45	53.4	1.55	22.23	No	No	No	92	14	4.8	2.07	6.77	230	0.24	124	36.2	0.9	1.09	24.8	16.9	0.42	1.4	2.01	1.14	0.58	13.8	2.63	8.1	0.64	4.54	0.57	29.84	0.02145	-0.02145
Non-DVT group	47	55.6	1.6	21.72	Yes	No	No	110	14	2.37	1.71	6.08	276	0.28	129	37.1	0.89	0.67	25.7	16.3	0.34	1.18	3.66	1.05	0.97	84.9	8.9	26.6	1	1.56	0.69	61.49	0.11093	-0.11093
Non-DVT group	49	63.6	1.64	23.65	No	No	No	115	14	8.08	1.09	8.98	274	0.25	136	39.1	1.15	0.83	27.1	17.4	0.13	1.32	3.49	1.16	0.94	32.15	5.41	7.6	1.72	2.1	1.6	31.73	0.0154	-0.0154
Non-DVT group	45	64.5	1.61	24.88	No	No	No	160	14	4.45	1.83	6.61	230	0.23	113	34.9	0.89	0.87	27.2	17.6	0.17	1.26	4.17	1.14	1.2	36.9	22.78	7.6	5.9	2.3	0.59
Non-DVT group	36	58	1.58	23.23	No	No	No	49	14	3.23	2.17	5.71	247	0.26	146	42	0.92	1.36	28.3	17.3	0.11	1.54	2.6	1.25	0.71	7.1	7.2	5	1.9	1.74	0.84	29.19	0.00113	-0.00113
Non-DVT group	31	51	1.55	21.23	No	No	No	60	14	4.75	1.35	7.63	324	0.3	142	41.5	0.92	0.66	27.8	16.5	0.19	1.63	3.23	1.24	0.85	306.4	26.61	20.5	5.91	1.67	0.75
Non-DVT group	28	46.3	1.59	18.31	No	No	No	85	14	2.73	1.01	5.15	177	0.22	142	41.1	0.92	0.94	32.9	16.4	0.11	1.33	2.64	1.06	0.69	15.6	5.01	4.8	5.6	2	0.68	39.33	0.00044	-0.00044
Non-DVT group	45	65	1.52	28.13	No	No	No	83	15	1.91	2.46	4.06	227	0.28	101	32.4	1.13	1.83	26.8	16.2	0.95	1.29	2.7	1.07	0.69	8.4	141	11.5	1.51	1.6	0.95	24.86	0.02319	-0.02319
Non-DVT group	31	61	1.64	22.68	No	No	No	88	13	2.92	1.04	5.47	297	0.29	134	38	0.9	1.5	28	16	0.19	0.99	3.13	0.96	0.9	15.6	2.53	9.1	1.6	2.38	0.84	29.84	0.00266	-0.00266
Non-DVT group	36	49	1.6	19.14	No	No	No	110	14	4.78	0.93	7.61	226	0.2	124	36.4	0.87	1.21	28.4	17.2	0.06	1.23	3.03	1.03	0.84	18.1	7.68	9.1	0.57	1.93	0.85	61.49	0.00455	-0.00455
Non-DVT group	28	52	1.58	20.83	No	No	No	170	14	1.92	2	3.77	244	0.23	136	40.2	0.86	0.69	27.9	17.2	1.13	1.81	3.78	1.27	0.9	8.7	5	6.8	0.89	1.91	0.58	51.64	0.0232	-0.0232
Non-DVT group	25	47	1.63	17.69	No	No	No	102	14	2.29	1.27	4.48	275	0.29	135	39.7	0.95	0.79	30.1	17.9	0.35	1.24	3.14	0.94	0.79	9.6	3.95	4.9	0.85	1.51	1.2	59.64	0.00205	-0.00205
Non-DVT group	42	62.8	1.6	24.53	No	No	No	273	14	1.91	1.53	3.88	278	0.27	114	36.6	0.9	1.19	26	17.6	0.15	0.96	3.51	0.91	1.05	32.7	22.65	25.61	1.88	1.54	0.8	38.09	0.13823	-0.13823
Non-DVT group	38	49.4	1.63	18.59	No	No	No	95	14	5.76	1.34	8.02	314	0.3	71	25.7	0.92	0.77	24.9	16.4	0.37	1.55	2.71	1.18	0.74	29.62	6.93	4.9	0.92	2.5	0.57	18.68	0.01241	-0.01241
Non-DVT group	31	52	1.65	19.1	No	No	No	68	14	2.89	1.55	4.87	216	0.24	135	40.9	1.13	2.61	29.6	17.1	0.1	1.52	3.61	1.26	0.93	11.1	7.89	16.4	0.64	2.16		54.62	0.00091	-0.00091
Non-DVT group	29	51.9	1.62	19.78	No	No	No	82	14	4.49	2	6.78	219	0.23	126	37.3	0.94	1.63	29.2	15.6	0.53	1.78	2.83	1.22	0.75	25.9	15.64	10.62	0.83	1.39	0.58	21.63	0.00195	-0.00195
Non-DVT group	41	56.7	1.53	24.22	No	No	No	107	14	2.59	1.91	3.96	524	0.55	82	26.6	0.87	0.7	23.3	17.5	0.46	0.88	5.01	0.77	1.21	9.1	3.52	6	0.97	1.5	0.41	21.54	0.04618	-0.04618
Non-DVT group	39	61.2	1.58	24.52	No	No	No	117	14	2.79	1.42	5.61	245	0.3	106	34.2	0.99	0.6	24.6	16.8	0.49	0.94	2.51	0.85	0.73	16.4	6	8	1	2.02	1.1	28.57	0.03341	-0.03341
Non-DVT group	36	51	1.55	21.23	No	No	No	100	14	2.41	2.76	4.35	221	0.3	123	39.2	0.85	0.88	28.2	17.5	0.2	1.57	3.84	1.16	0.94	11.7	2	4.8	1.72	1.31	0.69	26.67	0.00326	-0.00326
Non-DVT group	37	67.5	1.58	27.04	No	No	No	145	14	2.1	1.42	4.58	131	0.33	122	37.5	0.91	0.8	30.1	16.4	0.17	1.13	2.74	0.95	0.71	11.6	2	10.8	2.13	1.81	0.78	35.64	0.00507	-0.00507
Non-DVT group	32	41	1.5	18.22	No	No	No	96	14	2.9	2.83	5.59	435	0.42	128	37.9	0.91	1.63	29.7	16.3	0.29	1.22	4.56	1.05	1.09	12.1	4.75	10	1.74	3.52	0.8	23.72	0.00177	-0.00177
Non-DVT group	38	60.8	1.56	24.98	No	No	No	147	14	2.12	2.25	4.29	356	0.39	133	39.3	1.05	2.45	25.1	16.5	0.19	1.14	3.76	0.99	1	24.4	13.59	7.6	1.57	1.51	0.58	29.68	0.02017	-0.02017
Non-DVT group	41	62	1.6	24.22	No	No	No	149	14	2.52	1.95	4.06	174	0.17	102	33.3	0.9	1.87	22.2	17	0.13	1.31	4.01	1.09	1.07	11.54	95.29	4.9	5.6	1.54	1.1	30.79	0.04937	-0.04937
Non-DVT group	57	56.7	1.53	24.22	No	No	No	150	13	4.27	1.39	6.58	227	0.24	131	39	0.94	0.86	22.8	17.1	0.35	1.16	3.9	1.04	1.03	13.3	17.94	6.1	1.59	2.01	0.98	34.68	0.2731	-0.2731
Non-DVT group	27	68	1.62	25.91	No	No	No	65	13	2.82	2.1	5.42	321	0.39	141	40.5	0.88	1.33	27.7	16.9	0.12	1.26	3.8	1.18	1.09	18.92	10.65	6.8	0.85	2.4	1	41.68	0.00259	-0.00259
Non-DVT group	29	47	1.58	18.83	No	No	No	105	14	3.22	2.06	5.22	222	0.23	115	34.7	0.99	2.34	26.1	17.2	0.15	1.68	2.42	1.16	0.67	31.1	8.3	7.7	1.88	3.73	0.7	32.81	0.00384	-0.00384
Non-DVT group	39	52.6	1.62	20.04	No	No	No	120	14	1.68	2.27	3.18	261	0.25	99	30.6	0.82	1.03	26.8	17.4	0.99	1.01	3.52	0.88	0.95	20.3	11.64	6.2	0.92	3.6	0.84	39.33	0.04913	-0.04913
Non-DVT group	23	44	1.6	17.19	No	No	No	108	14	3.14	2.67	5.99	219	0.27	139	41	0.91	0.78	32.9	17.6	0.22	1.9	4.65	1.26	1.13	28.64	11.97	1.6	0.64	4.8	0.58	24.86	0.00037	-0.00037
Non-DVT group	48	65	1.62	24.77	No	No	No	152	14	3.55	2.25	4.88	342	0.27	99	32.7	0.9	1.1	23.9	17.2	0.08	1.5	3.95	1.11	1.02	7.3	7.98	11.6	2.03	3.05	0.78	29.84	0.05648	-0.05648
Non-DVT group	38	51	1.67	18.29	No	No	No	109	14	2.56	1.5	3.89	177	0.19	134	38.9	0.93	0.7	26.5	18	0.15	1.5	3.27	1.11	0.85	2.6	7.8	5.1	0.85	2.4	0.58	61.49	0.01074	-0.01074
Non-DVT group	27	45	1.56	18.49	No	No	No	68	13	2.94	1.76	5.41	226	0.22	142	40.7	1	0.97	27.3	16.7	0.09	1.7	2.48	1.22	0.65	12.6	23.39	13.62	1.88	2.1	0.6	42.9	0.00314	-0.00314
Non-DVT group	31	66	1.65	24.24	No	No	No	69	14	7.8	1.62	9.6	302	0.3	145	42.2	0.92	0.86	29.8	16.9	0.14	1.29	3.2	0.98	0.77	15.84	11.62	6.4	0.92	1.4	1.62	156.65	0.00283	-0.00283
Non-DVT group	38	50	1.6	19.53	No	No	No	69	14	2.69	1.64	4.67	202	0.2	134	39.1	0.89	1.12	26.5	16.2	0.12	1.64	2.76	1.23	0.74	107.9	2.94	8.5	0.64	1.15	0.58	92.65	0.0056	-0.0056
Non-DVT group	43	62.7	1.59	24.8	No	No	No	107	13	2.39	1.12	4.15	270	0.31	157	45.9	0.95		35.8	17.8	0.06	1.35	3.88	1.14	1.02	12.7	10.65	4.7	0.85	1.81	0.41	98.65	0.00165	-0.00165
Non-DVT group	39	63.4	1.65	23.29	No	No	No	232	14	2.63	1.37	4.75	219	0.21	133	36.9	0.94	0.9	27.4	17.2	0.18	1.33	3.11	1.13	0.84	6.7	82.89	5.4	1.88	3.6	0.5	20.69	0.03455	-0.03455
Non-DVT group	50	58	1.54	24.46	No	No	No	166	14	1.93	1.95	4.36	271	0.26	133	39.8	0.93	1.32	28.1	17.3	0.4	1.44	2.9	1.19	0.79	36.58	10.38	11.2	0.92	2.4		16.16	0.02922	-0.02922
Non-DVT group	34	60.9	1.58	24.4	No	No	No	165	14	3.5	1.06	5.92	288	0.32	132	40.1	0.85	3.04	28	17.7	0.27	1.24	3.06	1.03	0.8	8.8	5.9	18	0.64	1.5	2	17.62	0.00889	-0.00889
Non-DVT group	28	48	1.5	21.33	No	No	No	65	14	6.49	2.15	8.6	289	0.3	140	40.2	0.91	1.3	26.9	16.5	0.15	1.28	2.65	1.07	0.77	17.6	11.64	6	1.74	2.68	0.6	15.39	0.00124	-0.00124
Non-DVT group	26	52.2	1.65	19.17	No	No	No	165	14	2.67	1.5	5.9	489	0.45	71	25.1	0.94	1.17	21.2	17.3	0.34	1.53	2.34	1.19	0.67	125.1	3.89	14	1.05	2.79	0.68	61.59	0.04407	-0.04407
Non-DVT group	58	52.7	1.58	21.11	No	No	Yes	120	14	2.85	1.72	4.85	218	0.2	127	38.2	0.92	1.26	26.5	16.8	0.21	1.49	3.25	1.33	0.87	15.7	66.53	10.8	0.71	1.9	3.2	36.2	0.07804	-0.07804
Non-DVT group	47	55.4	1.65	20.35	No	No	No	70	14	3.5	1.45	6.99	271	0.26	148	43.7	0.96	1.02	27.3	17.7	0.18	1.91	2.23	1.39	0.63	59.4	12.15	4.7	0.94	1.55	0.8	50.29	0.00672	-0.00672
Non-DVT group	30	54	1.52	23.37	No	No	No	60	14	2.75	2.68	5.44	194	0.21	127	36.3	0.95	2.51	31.3	17.3	0.26	0.99	2.08	0.93	0.64	3.4	4.07	14.2	1.8	2.3	1.98	39.33	0.00066	-0.00066
Non-DVT group	28	47.1	1.6	18.4	No	No	No	70	14	4.22	0.99	6.63	233	0.27	132	40.2	0.9	1.52	59.1	16.7	0.12	2	1.57	1.4	0.46	13.2	14.69	15.3	0.62	2.28	2.65	24.86	0	0
Non-DVT group	51	60	1.58	24.03	No	No	No	140	14	2.33	1.57	4.15	393	0.44	95	30.5	0.96	1.33	30.3	18.2	0.19	1.34	2.77	1.26	0.73	19.3	9.63	11.2	0.85	3.5	2	29.84	0.00849	-0.00849
Non-DVT group	43	57	1.53	24.35	No	No	No	157	14	2.51	2.35	5.06	198	0.2	92	28.8	1.09	0.96	22	16.6	0.08	2.12	3.07	1.47	0.81	28.4	2	18	1.88	0.95	1.52	61.49	0.04349	-0.04349
Non-DVT group	30	65	1.58	26.04	No	No	No	155	14	2.98	1.6	5.85	399	0.44	125	37.4	0.83	0.92	29.3	16.4	0.91	1.31	4.04	0.94	0.95	11	6.44	6	0.92	1.4	0.4	24.45	0.01366	-0.01366
Non-DVT group	33	62	1.64	23.05	No	No	No	95	14	5	1.54	8.08	317	0.29	136	40.1	0.86	2.28	33.7	16.7	0.17	1.39	3.41	1.12	0.84	7.2	2.03	14	0.64	2.05	1.22	65.51	0.00074	-0.00074
Non-DVT group	28	51	1.59	20.17	No	No	No	55	14	2.31	2.58	5.41	283	0.32	127	39.7	1	1.02	30.1	15.8	0.11	1.57	2.98	1.23	0.7	7.6	10.14		5.8	2.4	0.98	52.61	0.0005	-0.0005
Non-DVT group	30	60	1.6	23.44	No	No	No	66	14	2.43	2.17	5.27	269	0.29	133	38.6	0.8	0.64	29.5	17.9	0.07	1.03	3.29	0.9	0.85	16.3	20.54	12.5	3.55	1.4	0.81	54.51	0.00122	-0.00122
Non-DVT group	44	56	1.57	22.72	No	No	No	137	14	4.19	1.61	6.43	244	0.24	137	39.1	0.84	1.24	30.2	15.5	0.15	1.91	3.14	1.31	0.81	12.6	9.92		0.85	2.1	0.68	49.65	0.00565	-0.00565
Non-DVT group	25	58	1.58	23.23	No	No	No	85	14	3.7	1.74	6.01	283	0.3	131	37.9	0.85	1.33	30.7	17.3	0.08	1.53	2.44	1.16	0.65	28.2	1	7.2	1.88	2.22	0.47	15.68	0.00042	-0.00042
Non-DVT group	35	59	1.65	21.67	No	No	No	65	14	3.56	2.69	5.73	255	0.3	122	36.9	0.89	0.99	27.6	16.6	0.08	1.76	3.03	1.29	0.76	9.6	4.6	4.2	0.92	2.39	0.58	29.67	0.00176	-0.00176
Non-DVT group	22	61.8	1.65	22.7	No	No	No	95	14	6.46	2.07	8.62	281	0.34	121	38.7	0.84	0.54	29.9	16.5	0.27	1.03	2.9	0.87	0.74	11.6	5.32	7.8	0.64	1.28	0.69	71.7	0.00153	-0.00153
Non-DVT group	41	64.5	1.56	26.5	No	No	No	118	14	5.53	2.44	7.15	296	0.28	128	37.5	0.86	1.66	26.2	17	0.11	1.39	5.8	1.02	1.33	194.6	1	18.7	0.64	2.23	0.4	33.48	0.01319	-0.01319
Non-DVT group	49	67	1.65	24.61	No	No	No	130	14	3.1	3.24	4.88	430	0.39	114	35	0.93	1.02	27.8	17.9	0.18	1.55	4.23	1.17	1.06	33.58	6.95		0.78	2.4	0.54	37.05	0.01918	-0.01918
Non-DVT group	36	57	1.64	21.19	No	No	No	125	14	1.51	2.09	3.76	284	0.28	134	39.7	1.07	0.78	28.9	17	0.13	1.53	2.72	1.24	0.7	18.93	49.83	6.6	1.62	2.4	0.69	39.33	0.00363	-0.00363
Non-DVT group	42	48.3	1.57	19.6	No	No	No	205	13	2.79	2.33	4.24	182	0.18	134	38.7	0.94	2.21	29.1	16.4	0.09	1.87	3.45	1.26	0.83	8.5	23.76	6.2	1.75	1.46	0.7	24.86	0.02438	-0.02438
Non-DVT group	31	58	1.6	22.66	No	No	No	146	14	4.25	1.59	7.19	263	0.29	144	42.9	0.95	1.07	27.9	16.6	0.31	2.23	4.05	1.54	1.04	5.6		15.1	0.68	2.6	0.7	29.84	0.00344	-0.00344
Non-DVT group	49	55.5	1.58	22.23	No	No	No	104	15		2.07		338	0.34	76	27.8	0.9	0.84	25.2	16.2	0.42	1.74	4.18	1.4	1.04	13.4	13.97	9.5	1.38	3.26	0.84	35.68	0.01413	-0.01413
Non-DVT group	51	48	1.54	20.24	No	No	No	145	14	8.37	1.31	10.79	297	0.28	110	36.1	0.98	0.71	26.8	16.6	0.42	1.29	4.38	1.17	1.16	7.9		12.7	1.63	2.1	0.95	29.64	0.03868	-0.03868
Non-DVT group	47	58	1.62	22.1	No	No	No	128	14	3.03	2.04	4.94	377	0.38	101	32.6	0.94	1.66	26.9	18.5	0.23	1.55	2.67	1.32	0.78	7.5	3.79	12.2	1.57	1.69	1	53.15	0.01682	-0.01682
Non-DVT group	49	61	1.55	25.39	No	No	No	180	15	3.96	2.58	7.07	343	0.32	95	30.5	0.95	0.85	24.2	16.1	0.11	1.41	3.45	1.17	0.8	5.6			0.68	1.65	0.8	35.6	0.0412	-0.0412
Non-DVT group	42	53.3	1.61	20.56	No	No	No	90	13	5.03	1.97	6.53	297	0.29	109	32	0.89	1.54	27.8	17.2	0.22	2.7	2.98	1.68	0.79	12.4	1		0.84	1.52	0.84	39.64	0.00952	-0.00952
Non-DVT group	41	53	1.56	21.78	No	No	No	125	14	2.28	2.08	4.42	201	0.23	133	38.9	0.97	1.45	29.6	16.2	0.09	1.54	3.06	1.19	0.83	9.9	15.64	9.6	0.95	1.36	0.94	41.62	0.00415	-0.00415
Non-DVT group	24	48	1.62	18.29	No	No	No	117	13	3.41	1.9	6.29	308	0.33	140	41.1	1.08	0.59	30.6	16.7	0.12	1.59	2.79	1.34	0.79	10.1	7.4	6	1.08	2.41	1	64.19	0.00117	-0.00117
Non-DVT group	51	56.5	1.6	22.07	No	No	No	135	13	1.95	2.54	4.06	278	0.25	136	40.4	1.01	0.89	26.7	17.3	0.84	1.87	4.37	1.47	1.09	11.8	1	7.5	2.47	1.29	0.56	58.62	0.14502	-0.14502
Non-DVT group	32	65.4	1.62	24.92	No	No	No	67	14	3.85	1.58	5.93	215	0.24	119	34.8	0.88	1.27	32	17.1	0.17	1.03	2.44	0.96	0.66	23.5	17.55	6.9	0.74	2.15	1.1	15.69	0.00061	-0.00061
Non-DVT group	75	53.6	1.46	25.15	No	No	Yes	50	14	1.88	1.66	5.11	202	0.2	132	38.7	0.89	2.33	26.2	17.2	0.35	1.47	2.67	1.22	0.71	9.7	7.66	4.9	2.7	1.54	0.24	26.68	0.13418	-0.13418
Non-DVT group	57	57.8	1.55	24.06	No	No	No	145	14	1.85	1.93	4.71	284	0.28	139	41.2	0.92	1.01	26	17.6	0.12	1.48	4.72	1.37	1.23	12.2	3.86	16.4	0.99	3.74	4.5	23.21	0.03237	-0.03237
Non-DVT group	55	69.9	1.56	28.72	No	No	No	75	14	3.43	1.25	6.11	270	0.27	159	46.8	0.96	1.32	27.3	18.4	0.13	1.39	5.13	1.16	1.29	18.62	4.53		0.61	3.62	1	63.62	0.01362	-0.01362
Non-DVT group	45	53	1.55	22.06	No	No	No	155	14	3.74	1.2	5.99	407	0.35	107	32.8	1	1.42	25.3	17.5	0.11	1.42	3.02	1.1	0.77	3.7	11.58		0.94	1.54	0.54	15.68	0.02763	-0.02763
Non-DVT group	49	57	1.65	20.94	No	Yes	No	121	13	5.52	1.63	8.85	231	0.26	110	31.9	0.95	1.8	28.8	16.8	0.33	1.16	2.57	0.95	0.7	8.1		10.4	0.61	3.55	0.21	30.87	0.05752	-0.05752
Non-DVT group	30	49.6	1.56	20.38	No	No	No	93	14	3.66	1.45	6.2	276	0.31	121	36.5	0.88	1.86	27.8	16.5	0.14	1.34	3.08	1.11	0.82	425.2	36.4	18.1	0.76	5.12	0.58	38.61	0.00271	-0.00271
Non-DVT group	47	66	1.68	23.38	No	No	No	105	14	3.96	1.37	7.29	196	0.2	116	34.3	0.98	1.65	24.5	16.6	0.52	1.47	2.97	1.2	0.81	19.4	15.67	9.2	2.03	1.05	0.36	37.05	0.04544	-0.04544
Non-DVT group	34	50	1.6	19.53	No	No	No	35	13	2.42	2.07	6.14	290	0.3	142	43	0.96	1.1	27.6	18	0.15	1.62	2.88	1.22	0.74	4.9	85.32	23	4.58	2.06	0.25	39.33	0.00213	-0.00213
Non-DVT group	58	58	1.5	25.78	No	No	No	227	13	4.61	0.63	7.34	207	0.21	126	36.7	0.89	1.11	26.6	17	0.17	1.38	3.43	1.12	0.85	27.4	10.66	11.1	1.39	1.78	0.98	24.86	0.20624	-0.20624
Non-DVT group	27	57	1.6	22.27	No	No	No	76	14	4.53	1.4	7.59	349	0.35	153	44.3	1.01	0.71	24	17.9	0.18	0.92	2.4	0.9	0.74	35.7	12.65	13	1.21	2.5	1.5	29.84	0.00492	-0.00492
Non-DVT group	44	71.2	1.7	24.64	No	No	No	355	14	1.82	2.78	3.72	388	0.35	119	36.8	0.91	0.78	24.5	16.6	0.17	1.5	2.92	1.13	0.79	11.2	6.58	11.2	1.6	2.58	1.52	61.49	0.51167	-0.51167
Non-DVT group	47	74.4	1.65	27.33	No	No	No	96	14	3.29	1.67	5.74	380	0.36	128	37.7	0.98	1.4	25	16.7	0.14	0.92	3.1	0.96	0.94	8.8	15.64	18	1.2	2.48	2.9	35.62	0.02302	-0.02302
Non-DVT group	30	54	1.6	21.09	No	No	No	73	14	4.3	2.02	6.16	290	0.32	138	43	0.89	1.94	28.8	16.7	0.59	1.51	2.4	1.23	0.64	132.5	10.71	6	1.73	1.66	2.58	25.65	0.00211	-0.00211
Non-DVT group	45	78	1.63	29.36	No	No	No	103	14	2.45	2.99	5.01	293	0.3	143	41	0.86	0.72	26.6	16.9	0.1	1.52	3.82	1.33	0.99	120.6	12.6	14	0.58	1.96	0.8	39.65	0.00809	-0.00809
Non-DVT group	59	60.4	1.58	24.19	No	No	No	106	14	3.45	1.6	7.98	218	0.22	118	36.1	0.88	1.02	26.5	16.2	0.07	1.41	4.21	1.17	1.08	17.7	47.92	10.7	1.86	3.89	1.52	28.64	0.02884	-0.02884
Non-DVT group	26	53	1.6	20.7	No	No	No	122	14	2.2	1.45	4.88	300	0.27	128	38.6	0.85	1.63	28.6	17.2	0.22	1.39	2.13	1.02	0.58	32.6	155	15.1	1.11	2.44	2.51	20.95	0.00239	-0.00239
Non-DVT group	29	54	1.58	21.63	No	No	No	85	14	3.17	2.63	5.85	187	0.24	146	43.6	0.89	0.74	30	17.3	0.18	1.64	3.19	1.18	0.84	7.5	13.19	9.5	1.1	5.11	0.9	29.68	0.00091	-0.00091
Non-DVT group	33	65	1.62	24.77	No	No	No	109	14	3.51	2.15	5.8	330	0.28	148	41.9	1.02	2.19	28.3	16.4	0.09	1.15	2.42	0.98	0.64	7.3	32.61	12.7	1.3	1.86	0.9	23.36	0.00306	-0.00306
Non-DVT group	28	58.5	1.6	22.85	No	No	No	113	14	3.76	1.4	6.97	278	0.27	143	41.4	0.91	3.22	27.9	17.3	0.17	1.44	3.15	1.12	0.77	213.6	2.62	15.1	1.64	1.54	0.7	63.65	0.00334	-0.00334
Non-DVT group	28	53	1.55	22.06	No	No	No	126	14	4.01	1.79	5.91	449	0.42	137	41	0.83	3.39	28.5	16.7	0.18	1.23	3.1	1	0.88	27.8	5.74	9.5	0.69	2.51	0.57	48.62	0.00302	-0.00302
Non-DVT group	31	52.6	1.6	20.55	No	No	No	105	14	2.64	3.13	4.81	215	0.23	134	39.8	0.74	0.75	28.2	16.9	0.05	1.33	2.78	1.08	0.73	8.8	67.53	12.7	1.98	1.92	0.14	37.05	0.00228	-0.00228
Non-DVT group	32	57.5	1.55	23.93	No	No	No	107	14	2.27	1.45	4.6	151	0.18	149	43.1	0.9	1.79	37	18.9	0.23	1.18	2.32	1.02	0.63	13.6		7.5	0.84	2.6	0.3	39.33	0.00029	-0.00029
Non-DVT group	38	56.5	1.6	22.07	No	No	No	35	14	1.33	2.09	3.07	225	0.23	141	42.8	0.98	1.77	30.1	17.2	0.4	1.52	2.56	1.22	0.69	6.8	4.55	7.8	1.18	3.7	0.92	24.86	0.00115	-0.00115
Non-DVT group	28	47.3	1.56	19.44	No	No	No	75	14	2.55	2.07	4.33	257	0.28	125	36	0.87	1.57	27.7	16.7	0.22	1.26	2.92	0.95	0.7	16.7	2.04	15.6	0.93	4.96	0.57	29.84	0.00203	-0.00203
Non-DVT group	32	53.1	1.63	19.99	No	No	No	75	14	3.77	3.35	5.86	475	0.45	92	30.1	0.81	2.04	23.4	17.1	0.29	1.19	3.02	0.96	0.8	13.2	1	6	0.89	1.47	0.6	37.05	0.01129	-0.01129
Non-DVT group	48	75.4	1.6	29.45	No	No	No	165	14	3.05	1.73	5.03	312	0.32	119	35.9	0.87	0.99	26.2	17	0.15	1.15	3.2	1.08	1	17.1	2.53		0.67	1.54	0.7	59.62	0.04192	-0.04192
Non-DVT group	25	50.5	1.65	18.55	No	No	No	139	14	2.31	1.82	4.2	225	0.23	135	40.3	0.89	3.41	28.1	16.8	0.13	1.15	3.03	1.01	0.8	8.8	9.4	11.8	0.74	2.86	0.7	24.86	0.00287	-0.00287
Non-DVT group	56	59	1.55	24.56	No	No	No	105	14	2.61	2.49	5.08	296	0.26	133	40.3	0.81	0.94	26.8	16.6	0.14	1.13	3.01	1.13	0.95	13	11.62	16.1	0.54	0.9	0.68	54.62	0.02453	-0.02453
Non-DVT group	29	52	1.6	20.31	No	No	No	85	14	2.98	2.17	4.05	338	0.31	128	37.2	0.8	1.33	30.8	17.4	0.12	1.73	2.74	1.29	0.76	50.2	7.45	5.1	2.14	2.39	0.51	50.63	0.00068	-0.00068
Non-DVT group	47	58	1.54	24.46	No	No	No	167	14	2.86	1.87	4.56	252	0.24	133	39.8	0.88	2.42	26.8	16.6	0.43	1.36	3.1	1.08	0.93	27.8	2.51	7.5	1.65	2.51	0.8	16.62	0.04151	-0.04151
Non-DVT group	45	57.5	1.53	24.56	No	No	No	264	14	2.93	1.28	6.23	273	0.25	128	38.1	0.92	0.79	28	16.6	0.37	1.41	2.32	1.12	0.64	11.2	1.65	5.6	1.15	1.68	0.25	21.65	0.08206	-0.08206
Non-DVT group	49	76	1.6	29.69	No	No	No	130	15	4.59	1.81	6.82	397	0.4	123	37.3	0.92	2.04	25	16.3	0.11	1.18	3.39	1.04	0.9	24	12.67	6.9	1.16	1.29	0.95	26.65	0.01992	-0.01992
Non-DVT group	26	45.4	1.6	17.73	No	No	No	103	14	3.01	1.52	5.79	290	0.27	132	38.7	1.05	1.1	29.2	16.6	0.31	1.06	2.85	0.84	0.74	35.7	25.14	4.6	0.67	2.54	0.62	29.01	0.00249	-0.00249
Non-DVT group	25	53.5	1.54	22.56	No	No	No	105	14	3.99	1.8	7.39	253	0.25	136	40	0.88	0.44	29.8	17.4	0.09	1.38	3.66	1.06	0.91	23.7	205.65	7.6	1.43	2.38	0.9	35.31	0.00089	-0.00089
Non-DVT group	31	48	1.59	18.99	No	No	No	90	14	2.55	1.57	4.61	252	0.23	123	36.5	0.85	1.57	27.7	17	0.14	1.42	1.93	1.09	0.57	18.6	9.25	11.9	0.95	2.54	0.63	36.54	0.00249	-0.00249
Non-DVT group	43	62.4	1.62	23.78	No	No	No	133	14	3.05	1.52	4.85	150	0.16	144	42.2	0.79	2.32	26.7	16.8	0.24	1.33	2.29	1.05	0.64	14.65	7.45	15.62	0.78	2.65	0.5	22.13	0.01807	-0.01807
Non-DVT group	21	50	1.58	20.03	No	No	No	95	14	2.82	2.01	6.11	240	0.24	139	40.7	0.94	0.66	28.4	16.7	0.1	1.15	2.86	1.1	0.76	10.59	4.45	6.8	0.69	1.51	1	26.95	0.00072	-0.00072
Non-DVT group	45	57	1.58	22.83	No	No	No	174	13	3.33	2.39	6.37	239	0.2	80	27.1	0.86	1.02	26.7	17.5	0.14	1.35	3.1	1.02	0.87	4.9	2.9	9.3	1.76	2.77	1.3	74.13	0.113	-0.113
Non-DVT group	49	62	1.59	24.52	No	No	No	128	14	2.44	1.07	4.33	403	0.41	99	31.3	0.82	3.79	21.8	16.8	0.25	1.52	2.99	1.19	0.8	5.9		15.1	1.6	2.64	0.68	48.62	0.08938	-0.08938
Non-DVT group	25	48.8	1.6	19.06	No	No	No	98	14	1.83	1.81	3.93	227	0.25	122	36	0.94	2.34	31.3	16.6	0.15	1.25	2.05	1.12	0.57	38.4	2.21	9.5	1.8	2.54	0.89	15.69	0.0005	-0.0005
Non-DVT group	28	55	1.63	20.7	No	No	No	82	14	3.55	1.19	7.72	231	0.22	137	40.3	0.83	1.29	31.5	17.8	0.09	1.18	3.39	1.9	0.96	32.1	15.68	12.7	0.68	1.65	1.7	34.11	0.0001	-0.0001
Non-DVT group	54	73	1.68	25.86	No	No	No	330	13	1.95	1.49	3.91	228	0.21	124	36.2	0.79	1.37	25.3	16.6	0.15	1.21	3.49	0.98	0.88	24.1	12.93	5.1	1.92	1.94	0.87	46.62	0.79306	-0.79306
Non-DVT group	31	60	1.62	22.86	No	No	No	98	14	2.63	2.21	5.2	211	0.23	127	37.5	0.91	0.97	27.9	16.9	0.07	1.49	2.32	1.21	0.69	18.65	24.63	6.4	1.64	1.84	0.9	19.68	0.00171	-0.00171
Non-DVT group	34	48.2	1.59	19.07	No	No	No	151	14	3.48	1.82	6.37	244	0.24	130	38.1	0.9	0.74	27.1	16.8	0.17	1.8	2.75	1.25	0.73	14.65	14.12	7.5	1.32	1.67	1.2	34.65	0.00772	-0.00772
Non-DVT group	51	46	1.5	20.44	No	No	No	156	13	4.14	2.09	8.13	188	0.21	127	38.9	0.81	0.73	29.4	17.6	1.64	1.95	2.62	1.27	0.68	10.64	11.64	15.62	0.48	1.69	0.8	32.67	0.2155	-0.2155
Non-DVT group	23	60	1.63	22.58	No	No	No	192	14	3.74	1.95	5.89	441	0.41	96	30.9	0.8	3.39	27.8	17.1	0.32	1.27	2.5	0.95	0.62	10.8	4.64	11.8	0.79	2.34	0.58	28.65	0.00862	-0.00862
Non-DVT group	42	47	1.58	18.83	No	No	No	140	14	2.77	1.78	5.07	189	0.18	120	37.2	0.87	0.8	29.3	17.4	0.4	1.74	1.92	1.18	0.54	18.69	9.4	14.63	1.6	2.48	1	24.65	0.01066	-0.01066
Non-DVT group	38	56	1.6	21.88	No	No	No	60	14	5.65	3	8.61	320	0.33	134	39	0.79	1.25	28.7	17.6	0.32	1.39	3.91	1	0.91	15.63	1	10.68	2.65	2.51	0.6	36.57	0.00346	-0.00346
Non-DVT group	49	52	1.6	20.31	No	No	No	110	14	4.77	2.16	7.46	211	0.22	141	42.6	0.89	0.76	25.2	17.4	0.09	1.56	3.27	1.2	0.82	22.7	15.62	9.5	2.1	1.98	0.6	33.47	0.02214	-0.02214
Non-DVT group	48	54	1.5	24	No	No	No	160	14	3.68	2.39	6.29	300	0.33	113	35.6	0.94	1.36	27	17.2	0.71	1.44	4.13	1.15	1.02	26.6	10.66	11.5	2.81	1.57	0.57	30.6	0.05457	-0.05457
Non-DVT group	30	57	1.6	22.27	No	No	No	48	14	2.65	1.61	4.49	283	0.27	127	37.6	0.91	1.02	26.1	16.3	0.3	1.33	2.84	1.06	0.73	14.6	23.75	5.1	1.6	1.54	0.66	46.62	0.0027	-0.0027
Non-DVT group	25	79	1.55	32.88	No	No	No	58	14	3.38	1.86	5.77	321	0.33	140	41.7	0.86	0.75	31.9	16.4	0.17	1.42	3.32	1.1	0.83	9.5	4.3	15.62	0.68	1.97	1.1	57.9	0.00027	-0.00027
Non-DVT group	64	47.2	1.47	21.84	No	No	No	147	14	3.02	2.59	5.46	423	0.41	131	38.7	0.88	3.82	24.7	16.7	0.09	1.72	4.97	1.48	1.37	7.2	8.4	1.6	0.51	3.51	0.69	51.69	0.07418	-0.07418
Non-DVT group	50	51	1.62	19.43	No	No	No	102	14	5.57	2.37	8.26	221	0.25	135	39.9	0.92	1.65	29.8	17.1	0.09	1.75	2.48	1.38	0.7	4.6	5.6	9.8	1.83	1.7	0.6	38.43	0.00487	-0.00487
Non-DVT group	46	52	1.58	20.83	No	No	No	99	14	3.55	1.31	5.84	310	0.33	142	43.2	0.88	1.41	31.5	16.8	0.2	1.2	2.64	1.17	0.74	11	1.69	17	1.1	2.68	0.58	19.98	0.00255	-0.00255
Non-DVT group	29	69.3	1.66	25.15	No	No	No	125	14	3.33	2.32	4.69	353	0.31	118	34.7	0.87	0.76	25.6	16.8	0.23	1.17	3.08	1.01	0.76	8.4	31.03	7.3	2.1	1.61	0.55	37.05	0.00805	-0.00805
Non-DVT group	48	82	1.6	32.03	Yes	No	No	175	14	3.58	1.92	4.79	379	0.38	103	37.2	0.9	1.02	24.7	16.5	0.71	0.97	2.77	0.93	0.78	10.3	9.92	5.4	6.2	2.51	0.8	39.33	0.41184	-0.41184
Non-DVT group	44	61	1.56	25.07	No	No	No	85	14	1.83	1.52	4.59	162	0.2	114	34.7	0.96	1.92	23.4	16.4	0.3	1.48	2.98	1.21	0.75	60.5	19.58	18.4	0.83	3.61	1.1	24.86	0.01888	-0.01888
Non-DVT group	46	54.3	1.56	22.31	No	No	No	216	14	4.97	1.53	3.96	292	0.29	96	33.1	0.87	0.54	27.7	16.6	0.33	0.95	2.47	0.96	0.76	23.7	3.45	1.6	1.21	3.52	0.56	29.84	0.06307	-0.06307
Non-DVT group	48	63	1.56	25.89	No	No	No	268	14	4.63	1.55	4.74	269	0.24	121	38	1.12	2.76	24.7	16.5	0.16	1.05	3.03	1.02	0.84	18.62	29.63	9.5	1.6	1.51	0.49	63.99	0.23824	-0.23824
Non-DVT group	32	58	1.64	21.56	No	No	No	100	14	5.48	1.39	3.95	302	0.28	132	40.8	0.82	0.85	28	16.5	0.24	1.75	4.35	1.25	1.04	10.62	6.5	15.1	1.2	1.45	0.51	64.84	0.00348	-0.00348
Non-DVT group	41	55	1.56	22.6	No	No	No	162	14	2.23	1.75	4.84	363	0.35	91	30.1	0.89	2.33	23.5	17.5	0.14	2.19	3.58	1.6	0.92	13.6	4.65	9.5	1.73	1.69	0.57	37.66	0.02129	-0.02129
Non-DVT group	46	55	1.61	21.22	No	No	No	130	14	4.02	1.73	6.37	340	0.38	102	34.6	0.82	1.01	25.8	16.7	0.29	2.29	3.55	1.2	0.87	10.62	4.03	12.7	0.68	2.58	0.55	66.7	0.04382	-0.04382
Non-DVT group	44	66	1.59	26.11	No	No	No	150	14	4	2.58	7.44	403	0.37	100	31.8	0.94	1.32	26.6	16.6	0.57	1.26	3.48	1.05	0.83	8.4	12.95	15.64	0.68	3.47	1	58.62	0.04746	-0.04746
Non-DVT group	37	55	1.55	22.89	No	No	No	197	14	3.39	1.07	6.06	256	0.25	136	39.4	0.91	1.42	30.9	17	0.15	1.6	3.86	1.26	0.94	10.7	5.05	6.3	1.68	6.87	1.54	15.68	0.00461	-0.00461
Non-DVT group	29	55	1.56	22.6	No	No	No	121	14	3.31	1.05	6.39	435	0.42	141	42	0.84	1.8	26.5	16.6	0.24	1.25	3.42	1.11	0.91	10.5	2.93	5.9	1.61	2.51	0.6	25.68	0.00401	-0.00401
Non-DVT group	58	68.5	1.56	28.15	No	No	No	166	14	2.28	1.01	4.46	288	0.28	124	36.8	1.05	1.86	23.7	16.5	0.17	1	3.84	1.03	1.04	425.2	6.13	7.6	1.12	3.13	0.86	36.62	0.1885	-0.1885
Non-DVT group	49	66	1.64	24.54	No	No	No	179	15	3.37	1.99	5.44	292	0.29	116	35.9	0.98	1.65	27.1	17.5	0.33	1.11	3.48	0.94	0.9	512	3.48	7.5	1.64	2.98	0.55	38.38	0.06356	-0.06356
Non-DVT group	30	53	1.55	22.06	No	No	No	60	13	3.53	1.41	6.24	261	0.29	129	38.6	0.79	0.74	31.1	16.9	0.2	1.18	3.02	0.98	0.82	4.9	15.92	9.2	0.94	3.64	0.55	38.65	0.00183	-0.00183
Non-DVT group	48	65	1.6	25.39	No	No	No	300	14	3.17	1.67	5.39	259	0.27	98	29.8	0.89	1.37	27.4	17.7	0.67	1.23	2.35	1.1	0.6	16.9	4.03	4.2	0.66	2.29	0.66	15.98	0.27937	-0.27937
Non-DVT group	31	40	1.5	17.78	No	No	No	75	13	2.04	1.78	8.06	381	0.38	132	40.2	1.01	0.98	33.3	17.4	0.08	1.4	3.91	1.1	0.92	35.7	12.95	9	1.32	3.37	0.5	57.64	0.00066	-0.00066
Non-DVT group	33	53	1.62	20.2	No	No	No	73	14	3.39	1.25	3.59	171	0.17	134	39.2	0.91	1.49	27.7	17.3	0.08	1.6	2.58	1.35	0.66	5.9	5.05	1.6	0.61	3.61	0.42	63.99	0.0016	-0.0016
Non-DVT group	50	66.5	1.65	24.43	No	No	No	127	14	2.55	2.31	4.26	172	0.18	156	45.5	0.98	1	26.8	17.3	0.17	1.53	4.48	1.32	1.08	4.5	2.93	6.5	0.84	2.51	0.66	64.84	0.02189	-0.02189
Non-DVT group	32	48	1.6	18.75	No	No	No	69	14	5.13	2.15	13.57	314	0.27	129	36.9	0.89	1.77	28.6	17.4	0.19	1.87	3.03	1.37	0.79	9.5	6.13	6.7	0.51	1.69	0.47	37.66	0.00116	-0.00116
Non-DVT group	44	51	1.5	22.67	No	No	No	155	14	4.51	1.94	5.92	359	0.4	99	31.5	0.94	2.91	23.3	16.8	0.07	1.73	3.2	1.28	0.85	4.7	3.48	8.4	0.97	2.23	1.47	68.65	0.04055	-0.04055
Non-DVT group	31	79.2	1.6	30.94	No	No	No	145	14	2.8	1.7	3.9	306	0.31	134	39.5	0.79	0.71	26.8	17.4	0.15	1.45	3.64	1.14	0.87	9.8	15.92	23	4.58	2.06	1.3	62.69	0.00667	-0.00667
Non-DVT group	20	55	1.61	21.22	No	No	No	145	14	2.48	1.43	6.1	350	0.39	71	23.9	0.95	1.78	22.8	16.6	0.23	1.58	3.07	1.07	0.78	5.2	4.03	11.1	1.39	1.78	0.85	54.62	0.01192	-0.01192
Non-DVT group	40	53	1.58	21.23	No	No	No	273	14	2.66	1.64	7.4	405	0.42	97	29.7	1.1	1.91	28.3	16.3	0.56	1.26	2.27	1.05	0.62	7.1	12.95	13	1.21	2.5	0.8	24.15	0.09585	-0.09585
Non-DVT group	28	58.5	1.64	21.75	No	No	No	71	14	5.18	2.03	5.67	259	0.25	119	35.8	0.91	0.92	26.9	17.5	0.41	1.34	3.24	0.98	0.77	9.5	5.05	11.2	1.6	2.58	0.98	43.34	0.00379	-0.00379
Non-DVT group	44	50.8	1.56	20.87	No	No	No	115	14	3.37	2.16	4.71	378	0.35	91	29.5	0.87	4.1	22.2	16.9	0.15	1.65	2.73	1.33	0.7	4.6	2.93	18	1.2	2.48	0.74	47.69	0.03093	-0.03093
Non-DVT group	29	54	1.65	19.83	No	No	No	94	14	2.88	2.47	3.49	268	0.3	119	36.5	0.92	1.04	28.6	17	0.33	1.07	3.54	0.94	0.87	11.6	6.13	6	1.73	1.66	0.58	33.16	0.00297	-0.00297
Non-DVT group	52	54	1.52	23.37	No	No	No	125	14	3.55	2.13	12.04	387	0.31	107	32	1.08	0.89	29.6	17	0.23	1.25	3.24	1.19	0.89	64.1	3.48	14	0.58	1.96	0.49	37.6	0.01053	-0.01053
Non-DVT group	34	53	1.57	21.5	No	No	No	65	14	3.33	2.75	5.97	399	0.33	123	39.1	0.95	1.14	30.4	16.9	0.36	2.03	2.16	1.34	0.61	6.3	15.92		0.98	2.63	0.69	47.16	0.00115	-0.00115
Non-DVT group	34	55	1.6	21.48	No	No	No	95	14	3.58	2.22	5.15	311	0.32	139	40.7	0.93	0.74	28.7	17.6	0.11	2.01	3.93	1.45	0.96	28.4	23.72	21.2	1.47	2.23	0.47	38.64	0.0015	-0.0015
Non-DVT group	45	52	1.6	20.31	No	No	No	160	14	1.83	1.35	6.6	344	0.33	108	33.8	0.91	1.84	26.8	17.6	0.48	1.5	2.83	1.38	0.75	5.6	12.95	9.8	1.21	1.64	9.78	24.68	0.02417	-0.02417
Non-DVT group	46	47	1.6	18.36	No	No	No	86	14	4.97	1.83	4.86	190	0.2	127	36.8	1.08	0.69	34.7	16.8	0.83	1.54	4.11	1.21	1	16.2	5.05	8.4	1.6	3.51	2.54	38.64	0.00308	-0.00308
Non-DVT group	25	74.2	1.66	26.93	No	No	No	80	14	4.63	2.6	5.03	305	0.28	123	35.8	0.89	1.79	26.9	16.6	0.26	1.2	3.08	1.05	0.79	15.6	2.93	6.2	1.2	1.94	1.51	26.61	0.00194	-0.00194
Non-DVT group	38	63.6	1.65	23.36	No	No	No	105	14	5.48	2.11	4.2	389	0.42	136	41.5	1.05	0.85	28.9	16.8	0.21	1.73	4.63	1.36	1.13	24.4	6.13	8.1	1.73	1.67	0.97	47.69	0.00328	-0.00328
Non-DVT group	53	65	1.5	28.89	No	No	No	205	14	2.23	1.63	5.08	337	0.34	127	38.2	0.94	1.23	25.2	16.8	0.26	1.15	4.02	1.12	1.09	18.62	3.48	3.5	0.98	2.56	0.78	33.16	0.10311	-0.10311
Non-DVT group	43	52	1.62	19.81	No	No	No	175	14	4.02	1.68		350	0.35	92	30.1	0.99	0.95	26.2	16.5	1.16	1.13	2.6	1.02	0.72	22.4	15.92	5.8	0.54	1.47	4.69	37.6	0.15957	-0.15957
Non-DVT group	43	60.4	1.5	26.84	No	No	No	122	14	4	2.19	4.56	373	0.38	88	30	0.94	1.45	25.1	16.5	0.41	0.9	2.21	0.94	0.61	7.8	11.61	15.64	1.6	3.51	0.8	47.16	0.02893	-0.02893
Non-DVT group	50	70	1.6	27.34	No	No	No	245	14	3.39	1.28	6.32	242	0.25	104	32.1	0.91	3.24	31.1	16.4	0.25	1.67	1.55	1.35	0.45	19.8	4.03	6.4	0.94	2.41	1.66	38.61	0.03019	-0.03019
Non-DVT group	45	55.2	1.59	21.83	No	No	No	127	14	3.31	2.12	6.82	294	0.25	117	34.2	0.85	1.68	24.5	17.1	0.43	1.45	2.87	1.12	0.71	10	12.95	23.4	1.65	2.2	0.45	37.69	0.04574	-0.04574
Non-DVT group	31	79.5	1.6	31.05	No	No	No	63	13	2.28	1.79	5.42	263	0.25	115	36.4	0.92	1.22	26.1	16.7	0.19	1.02	2.72	0.87	0.67	14.2	5.05	4.6	0.91	2.65	0.66	47.69	0.00597	-0.00597
Non-DVT group	71	48.5	1.55	20.19	No	No	No	60	14	3.37	2.03	6.32	221	0.21	123	36.8	0.94	0.67	31.3	18	0.25	0.75	3.02	0.8	0.88	14.6	2.93	9.9	0.67	3.19	0.16	33.16	0.02506	-0.02506
Non-DVT group	49	53	1.57	21.5	No	No	No	48	15	3.53	3.24	3.48	310	0.31	123	37.3	0.82	1.21	26.3	19	0.18	1.54	2.79	1.24	0.73	56.4	6.13	17.3	0.5	2.46	0.98	37.6	0.00432	-0.00432
Non-DVT group	46	62	1.64	23.05	Yes	No	No	122	14	3.17	2.79	7.24	119	0.1	132	38.9	1.12	1.94	23.3	15.7	0.18	1.04	6.35	0.86	1.47	5.6	3.48	3.5	0.68	1.64	0.6	47.16	0.20799	-0.20799
Non-DVT group	53	68	1.63	25.59	No	No	No	64	13	2.04	2.11	6.95	249	0.25	108	34.3	0.88	0.92	27.8	17.1	0.13	1.02	2.75	0.98	0.71	10.5	15.92	1.65	0.94	2.66	2.51	25.57	0.01671	-0.01671
Non-DVT group	50	53	1.57	21.5	No	No	No	110	13	3.39	1.77	8.4	171	0.17	110	32.4	0.93	0.94	27.3	16.8	0.21	1.82	2.12	1.32	0.55	4.2	12.95	10.65	1.64	1.44	1.65	31.68	0.03506	-0.03506
Non-DVT group	26	44.8	1.54	18.89	No	No	No	155	14	2.55	1.59	8.2	218	0.21	121	36.9	0.88	0.58	24.1	17	0.22	1.45	2.88	1.11	0.73	20.4	5.05	4.4	0.54	2.52	0.65	47.69	0.01215	-0.01215
Non-DVT group	45	59.3	1.52	25.67	No	No	No	184	14	5.13	2.22	5.18	223	0.23	107	33.5	0.99	3.06	27.7	16.9	0.07	1.47	2.02	1.22	0.58	12	2.93	3.8	1.08	2.06	0.8	33.16	0.01629	-0.01629
Non-DVT group	57	57	1.55	23.73	No	No	No	90	14	4.51	1.95	6.68	290	0.27	125	36.5	0.91	1.79	24.6	16.4	0.35	1.23	2.87	1.07	0.75	15.62	6.13	8.4	1.62	0.69	0.5	37.6	0.05735	-0.05735
Non-DVT group	28	66	1.58	26.44	No	No	No	60	14	2.8	1.33	4.42	287	0.31	139	39.6	0.96	1.11	30.1	17.6	0.15	0.95	3.74	0.9	0.94	10.32	3.48	5.1	3.2	2.51	1.51	47.16	0.00078	-0.00078
Non-DVT group	35	57	1.63	21.45	No	No	No	80	14	2.48	1.68	4.1	298	0.28	104	30.8	0.87	0.86	26.7	15.9	0.15	1.87	2.59	1.21	0.68	6.4	15.92	10.63	1.8	3.68	0.98	26.61	0.00365	-0.00365
Non-DVT group	46	49	1.58	19.63	No	No	No	97	13	2.66	1.25	6.66	363	0.35	150	45.3	0.97	0.97	32.6	16.4	0.23	1.6	3.23	1.31	0.82	9.2		2.64	3.5	4.51	0.51	18.94	0.00466	-0.00466
Non-DVT group	26	53	1.59	20.96	No	No	No	137	14	5.18	1.59	6.51	311	0.31	120	37.3	0.97	1.61	26.8	16.9	0.24	1.61	4.17	1.14	1.03	13.9		10.3	2.3	4.56	0.58	21.62	0.00414	-0.00414
Non-DVT group	46	40.3	1.61	15.55	No	No	No	176	14	3.37	2	12.05	252	0.23	131	39.8	0.93	0.72	27.3	16.6	0.19	2.26	5.11	1.46	0.78	5.2	4.1	7.5	0.67	5.6	0.63	34.65	0.02393	-0.02393
Non-DVT group	33	77.5	1.58	31.04	No	No	No	102	13	3.55	2.27	5.54	253	0.25	140	40.9	0.85	1.03	29.3	16.7	0.32	0.71	2.7	0.76	0.84	11.8	10.96	9.5	1.7	1.48	0.58	37.58	0.0062	-0.0062
Non-DVT group	38	52	1.6	20.31	No	No	No	40	15	3.33	2.11	5.2	285	0.29	125	38	0.86	1.46	29.8	16.9	0.11	2.23	2.19	1.47	0.6	7.8		15.62	1.64	1.85	0.57	26.1	0.00042	-0.00042
Non-DVT group	31	53	1.6	20.7	No	No	No	100	14	3.58	1.69	5.03	262	0.3	126	38.6	0.94	2.52	30.6	17.1	0.22	1.33	4.26	0.97	0.96	7.9	10.77	5.8	0.96	2.64	1.6	97.75	0.00268	-0.00268
Non-DVT group	25	45	1.52	19.48	No	No	No	85	13	1.83	0.99	4.18	225	0.24	132	37.8	0.91	0.95	28.6	16.9	0.25	1.12	3.07	0.97	0.8	11.3		20.5	0.99	1.68	0.51	76.74	0.00284	-0.00284
Non-DVT group	46	63	1.55	26.22	No	No	No	149	14	4.97	1.48	4.38	208	0.25	108	34.1	0.96	0.86	23.4	16.5	0.4	1.35	2.52	1.06	0.73	66.8	10.53	15.64	2.5	3.69	0.69	53.95	0.09138	-0.09138
Non-DVT group	39	60.2	1.64	22.38	No	No	No	85	14	4.63	1.99	3.8	227	0.22	126	36.9	0.94	3.92	28.6	16.7	0.07	1.23	2.31	0.96	0.61	28.8	5.19	18.3	1.4	4.3	0.7	63.62	0.00482	-0.00482
Non-DVT group	26	55	1.58	22.03	No	No	No	70	14	5.48	1.91	3.87	286	0.27	125	38.1	0.96	1.6	32.9	16.3	0.34	1.26	2.69	1.05	0.68	19.3	146.1	6.2	2.64	1.02	0.58	58.61	0.00045	-0.00045
Non-DVT group	37	50.5	1.62	19.24	No	No	No	142	14	2.23	1.39	5.09	354	0.37	111	37.5	0.86	1.56	32.9	15.9	0.11	1.45	3.49	1.41	0.91	34.4	26.78	8.5	1.36	2.07	0.69	46.68	0.00115	-0.00115
Non-DVT group	42	64	1.64	23.8	No	No	No	150	14	4.02	1.97	5.48	301	0.32	123	35.9	0.94	6.92	25.2	17.1	0.72	1.01	3.45	0.98	1.01	26.61	11.56	2.6	1.62	4.51	0.5	39.78	0.07713	-0.07713
Non-DVT group	60	80	1.67	28.69	No	No	No	125	14	4	1.12	4.85	252	0.26	134	40.2	0.86	1.07	24.9	17.9	0.15	1.03	2.54	1.02	0.7	20.63	10.54	6.8	2.4	1.51	0.58	26.1	0.09087	-0.09087
Non-DVT group	57	51	1.59	20.17	No	No	No	37	14	3.39	1.87	5.45	162	0.17	125	39.3	1.02	0.97	28.5	17	0.14	1.76	3.88	1.29	0.93	22.3	12.95	7	1.19	3.34	0.6	97.75	0.00909	-0.00909
Non-DVT group	32	65	1.63	24.46	No	No	No	83	14	3.31	1.42	8.42	261	0.28	109	35.7	0.98		28.1	16.8	0.25	1.08	2.65	0.97	0.7	21.6	5.05	4.5	2.4	2.58	0.87	76.74	0.00384	-0.00384
Non-DVT group	39	62	1.65	22.77	No	No	No	128	14	2.28	2	4.23	358	0.37	100	32.1	0.91	1.03	26	16.6	0.29	1.14	3.45	0.92	0.87	31.8	2.93	8.5	0.71	1.49	0.7	53.95	0.02533	-0.02533
Non-DVT group	56	60.3	1.64	22.42	No	No	No	187	14	3.37	1.62	5.14	416	0.42	119	35.4	0.9	1.17	24.9	16.5	0.51	1.29	4.46	1.13	1.16	32.5	6.13	13.1	0.88	2.82	0.98	57.64	0.24823	-0.24823
Non-DVT group	46	45.5	1.54	19.19	Yes	No	No	125	14	3.53	1.03	5.57	268	0.24	118	35.2	0.89	1.91	28.2	17.9	0.16	1.03	3.01	0.89	0.83	868.1	12.95	3.6	0.95	1.69	0.62	48.62	0.0948	-0.0948
Non-DVT group	41	45	1.55	18.73	No	No	No	62	14	3.17	1.29	6.06	307	0.3	127	37.6	1.08	2.07	28.6	17.1	0.42	1.65	2.7	1.32	0.69	18.62	5.05	5.8	1.2	4.62	0.6	26.1	0.00283	-0.00283
Non-DVT group	62	57.2	1.6	22.34	No	No	No	150	14	2.04	1.81	6.02	370	0.33	129	38	0.89	2.06	24.7	17.8	0.21	1.4	4	1.25	1.03	15.6	2.93	7.5	2.4	3.54	0.57	97.75	0.16932	-0.16932
Non-DVT group	31	60	1.63	22.58	No	No	No	145	14	3.39	1.76	3.2	343	0.32	120	38.5	0.85	0.71	26	16	0.12	1.65	3.59	1.26	0.9	43.9	6.13	14.4	1.56	2.71	0.63	76.74	0.00872	-0.00872
Non-DVT group	30	49	1.61	18.9	No	No	No	120	14	2.55	1.82	5.62	305	0.3	124	37	0.91	2.06	31	16.3	0.06	1.68	2.85	1.19	0.71	18.1	3.48	14.4	2.32	5.87	0.6	53.95	0.0013	-0.0013
Non-DVT group	22	48	1.63	18.07	No	No	No	151	14	5.13	2.78	6.59	103	0.13	119	36.5	0.89	1.28	28.7	18.1	0.18	2.13	2.49	1.67	0.71	52.62	15.92	1.06	0.61	3.64	0.15	41.62	0.00102	-0.00102
Non-DVT group	34	55	1.59	21.76	No	No	No	165	14	4.51	1.74	5.56	243	0.25	125	37.2	0.8	1.43	29.2	17.4	0.16	1.42	2.87	1.14	0.74	61.4	18.27	7.4	1.37	1.85	0.47	43.97	0.00596	-0.00596
Non-DVT group	66	58	1.58	23.23	No	No	No	128	14	2.8	1.84	6.43	234	0.21	143	42.7	0.86	0.7	27.4	16.6	0.17	1.06	4.22	0.92	1.07	100.1		13.1	1.51	6.52	0.58	47.69	0.10594	-0.10594
Non-DVT group	54	57.8	1.58	23.15	No	No	No	150	14	2.48	1.59	5.12	384	0.37	114	36.6	0.92	1.22	28.5	18	1.02	1.9	4.28	1.28	1.02	9.2	1	6.2	2.5	4.62	0.69	33.16	0.08894	-0.08894
Non-DVT group	27	57	1.62	21.72	No	No	No	125	14	2.66	2.23	6.49	265	0.26	129	39.9	0.9	1.97	29.9	17.1	0.05	1.25	2.96	0.95	0.73	47.2	22.6	18.6	1.24	4.12	5.4	37.6	0.00182	-0.00182
Non-DVT group	36	58.3	1.64	21.68	No	No	No	115	14	5.18	2.02	4.28	332	0.35	122	37.2	0.94	1.25	28.3	16.7	0.22	1.07	2.51	0.9	0.65	161		7.1	1.05	1.17	0.58	47.16	0.00832	-0.00832
Non-DVT group	48	62	1.6	24.22	No	No	No	208	14	3.37	1.55	5.29	260	0.26	149	44.6	1.15	0.71	30.1	17.2	0.11	1.82	4.3	1.35	1.06	27.4	16.49	14.9	0.88	2.87	1.2	51.59	0.01936	-0.01936
Non-DVT group	31	66.5	1.63	25.03	No	No	No	65	15	3.55	2.43	5.58	492	0.45	94	32.1	0.97	1.98	23.3	17.7	0.29	1.43	4.36	1.06	1	18.65	24.24	15.63	2.4	3.65	0.98	18.68	0.00429	-0.00429
Non-DVT group	27	46.5	1.65	17.08	No	No	No	100	13	3.33	1.97	7.33	243	0.25	130	37.6	0.94	1.33	31.6	17.5	0.03	1.63	1.97	1.27	0.6	15.4	14.29	15.6	3.4	1.65	0.3	33.81	0.0008	-0.0008
Non-DVT group	27	47	1.58	18.83	No	No	No	121	13	3.58	1.33	7.66	351	0.39	117	38.3	0.88	0.7	33.1	14.9	0.19	1.31	4.2	1.12	1.03	18.62	5.53	6.2	3.1	2.63	0.4	28.67	0.00157	-0.00157
Non-DVT group	58	57.5	1.58	23.03	No	No	No	165	14	1.83	2.24	5.84	444	0.43	135	39.5	0.95	1.43	29.1	15.5	0.11	1.13	3.6	0.98	1.03	58.9	12.95	15.3	1.14	1.19	7.9	29.38	0.044	-0.044
Non-DVT group	34	57.3	1.64	21.3	No	No	No	100	14	4.97	2.67	6.9	231	0.26	129	40	0.88	1.29	27.9	17.7	0.12	1.52	2.94	1.29	0.74	17.6	5.05	9.5	0.64	4.52	4.51	63.62	0.00292	-0.00292
Non-DVT group	29	75	1.63	28.23	No	No	No	70	14	4.63	2.16	6.73	380	0.36	116	35.8	1.03	0.75	29.2	13.8	0.17	1.14	3.34	0.91	0.83	6.5	2.93	7.5	0.81	1.9	0.9	36.84	0.00139	-0.00139
Non-DVT group	45	47.3	1.56	19.44	No	No	No	81	14	5.48	1.38	5.79	413	0.42	111	37.1	0.89	1.18	23.8	16.7	0.07	1.54	3.73	1.22	0.91	12.7	6.13	8.6	1.21	3.65	1	26.61	0.01292	-0.01292
Non-DVT group	38	53	1.55	22.06	No	No	No	178	14	2.23	1.51	6.13	268	0.26	142	44.6	0.93	2.01	28	17.5	0.56	1.4	4.82	1.18	1.16	11.8	3.48	6.3	1.6	1.92	1	51.11	0.02227	-0.02227
Non-DVT group	25	60	1.49	27.03	No	No	No	95	14	4.02	1.71	7.37	284	0.31	135	39.7	0.95	0.78	31.7	15.1	0.28	1.1	4.09	0.98	0.96	33.8	15.92	6.4	1.2	3.62	0.5	40.27	0.00057	-0.00057
Non-DVT group	58	49.4	1.58	19.79	No	No	No	205	14	4	1.48	5.23	209	0.23	129	41	0.93	1.57	23.3	14.6	0.21	1.44	3.28	1.42	0.92	26.6	1	5	1.73	2.54	2.51	24.61	0.17301	-0.17301
Non-DVT group	47	54.8	1.58	21.95	No	No	No	110	14	3.39	1.98	5.2	312	0.3	126	38.4	0.92	1.16	26.1	14.2	0.23	1.22	4.52	1.14	1.22	114.1	12.95	6.1	1.31	1.61	0.8	53.67	0.02074	-0.02074
Non-DVT group	31	45	1.62	17.15	No	No	No	136	14	3.31	1.16	6.39	407	0.4	92	31.3	0.95	0.69	28.5	17.3	0.23	1.52	2.74	1.3	0.72	11.4	5.05	4.9	1.16	2.81	0.69	28.65	0.003	-0.003
Non-DVT group	50	67.7	1.55	28.18	No	No	No	153	14	2.28	1.11	5.1	308	0.34	134	39.1	1.08	2.73	27.6	15.8	0.16	0.95	3.57	0.99	1	18.64	2.93	3.6	2.64	3.54	0.57	61.05	0.02986	-0.02986
Non-DVT group	54	50.3	1.59	19.9	No	No	No	102	14	3.37	1.32	6.86	193	0.19	137	39.8	0.8	2.03	31.2	15.6	0.11	1.52	5.88	1.14	1.32	301.4	6.13	8.5	0.69	1.62	0.58	185.9	0.02129	-0.02129
Non-DVT group	31	50.6	1.65	18.59	No	No	No	150	14	3.53	1.91	7.7	151	0.2	118	36.4	0.86	1.26	29.5	15.4	0.11	1.17	2.17	1	0.6	5.6	3.48	13.5	0.78	2.72	0.5	16.58	0.00355	-0.00355
Non-DVT group	55	54.2	1.52	23.46	No	No	No	90	14	3.17	2.59	4.02	185	0.18	123	37.4	0.93	1.87	24.7	17	0.19	1.49	3.79	1.26	0.95	5.7	15.92	6.5	3.4	3.69	1	18.78	0.02366	-0.02366
Non-DVT group	48	50.6	1.55	21.06	No	No	No	175	14	2.04	1.52	5.07	277	0.3	142	43.2	0.85	0.84	28	15.2	0.12	1.22	3.25	1.09	0.87	12.4	3.56	4.8	2.11	1.79	0.8	17.58	0.02234	-0.02234
Non-DVT group	60	60.8	1.52	26.32	No	No	No	91	14	3.39	2.04	6.16	353	0.36	145	45.7	0.91		27.6	14.4	0.9	1.02	2.56	1.1	0.76	15.6		13.7	0.91	4.52	0.57	25.61	0.05695	-0.05695
Non-DVT group	41	53	1.58	21.23	No	No	No	182	14	2.55	1.56	6	374	0.38	109	33.8	0.97	1.59	27.6	16.6	0.16	1.53	3.17	1.3	0.9	26.64	3.24	15.62	0.68	1.64	0.69	26.67	0.01355	-0.01355
Non-DVT group	52	63.6	1.66	23.08	No	No	No	178	14	5.13	2.56	8.06	305	0.31	95	30.3	0.93	2.56	22.6	16.6	1.35	1.34	3.09	1.14	0.79	181.9	2.05	9.9	0.57	1.15	1.69	24.51	0.58127	-0.58127
Non-DVT group	49	58	1.66	21.05	No	No	No	45	14	4.51	2.26	4.8	290	0.28	143	42.3	0.92	0.69	30.1	15.4	0.29	1.01	2.5	1.14	0.82	12.5	12.95	6.7	1.1	3.38	0.65	20.69	0.00291	-0.00291
Non-DVT group	41	64	1.68	22.68	No	No	No	130	14	2.8	2.38	4.52	440	0.4	127	39.5	0.89	0.9	27.7	16.4	0.2	1.63	2.45	1.36	0.64	4.7	5.05	4.7	0.5	2.33	3.1	44.77	0.00809	-0.00809
Non-DVT group	46	60.7	1.58	24.32	No	No	No	103	14	2.48	1.39	6.09	452	0.41	118	37.1	0.92	0.74	25.8	16.9	0.33	1.1	2.59	1.02	0.68	5.2	2.93	6.4	5.9	5.52	2.51	293.65	0.10393	-0.10393
Non-DVT group	47	59.3	1.55	24.68	No	No	No	210	14	2.66	1.71	6.47	330	0.34	129	37.8	0.84	1.12	23.4	14.1	0.41	1.1	3.2	1.11	1.08	16.4	6.13	12.6	2.55	4.23	1.6	36.51	0.15952	-0.15952
Non-DVT group	45	59	1.68	20.9	No	No	No	95	14	5.18	1.67	5.05	272	0.27	124	36.9	0.92	1	26.8	15	0.25	1.73	2.72	1.28	0.7	8.7	3.48	17.5	2.36	3.09	0.51	26.1	0.01053	-0.01053
Non-DVT group	51	65	1.58	26.04	No	No	No	95	15	3.37	2.14	4.12	218	0.22	145	43.2	0.89	0.66	31.3	15.4	0.16	1.27	4.7	1.26	1.2	16	15.92	9.1	1.14	2.54	0.4	97.75	0.00288	-0.00288
Non-DVT group	36	59	1.6	23.05	Yes	No	No	117	13	2.88	2.09	6.92	307	0.31	102	31.7	0.91	0.86	28	17	0.29	1.98	3.13	1.28	0.81	9.8	1	7.7	0.96	1.25	0.8	76.74	0.03811	-0.03811
Non-DVT group	54	65	1.58	26.04	No	No	No	127	14	4.63	1.84	6.72	279	0.28	145	44.5	0.98	2.64	28	18	0.15	1.67	5.25	1.29	1.22	62.1	9.49	9.8	1.98	2.66	1.9	53.95	0.01993	-0.01993
Non-DVT group	44	57.3	1.58	22.95	No	No	No	155	13	5.48	1.82	8.27	193	0.2	117	35.5	0.93	1.1	27.6	16.9	0.19	1.24	2.11	0.98	0.56	424.1	16.52	6.4	2.5	3.54	0.6	16.87	0.06756	-0.06756
Non-DVT group	43	49.6	1.56	20.38	No	No	No	187	14	2.23	3.03	4.66	206	0.24	126	38.6	0.89	1.35	25.4	14.7	0.2	1.31	3.82	1.2	0.96	13.14	18.54	4.9	0.65	1.68	0.68	18.69	0.03409	-0.03409
Non-DVT group	44	58.3	1.65	21.41	No	No	No	194	14	4.02	2.43	6.92	199	0.21	131	40.2	0.93	0.92	29.2	17.7	0.12	0.95	2.99	0.95	0.83	17.69	65.07	5.2	0.51	3.66	1	572.49	0.4387	-0.4387
Non-DVT group	44	60	1.57	24.34	No	No	No	84	14	4	1.99	6.56	184	0.19	150	45.5	0.93	0.93	30.6	18.5	0.16	1.53	2.64	1.25	0.72	20.8	12.95	9.7	0.79	3.16	1.9	37.81	0.00214	-0.00214
Non-DVT group	42	56.6	1.61	21.84	No	No	No	210	14	3.39	1.55	5.79	431	0.42	102	31.8	1.08	1.35	24.7	16.5	0.18	1.53	3.6	1.18	0.9	10.36	5.05	4.6	1.5	2.54	0.3	29.46	0.06449	-0.06449
Non-DVT group	57	74.5	1.68	26.4	No	Yes	No	210	14	3.31	1.47	6.79	237	0.23	132	39.3	0.85	1.21	26.3	17.3	0.17	0.9	2.8	1	0.83	20.68	2.93	9.5	0.64	3.62	0.54	26.98	0.16162	-0.16162
Non-DVT group	56	48.5	1.59	19.18	No	No	No	80	14	2.28	1.63	4.86	227	0.21	129	38.9	0.9	1.34	24	17.4	0.42	2.02	3.45	1.77	0.91	17.9	6.13	17.4	1.03	4.3	0.7	32.69	0.02207	-0.02207
Non-DVT group	42	67	1.68	23.74	No	No	No	215	14	3.37	1.64	6.21	265	0.26	137	41.9	0.96	0.93	26.4	17.4	0.18	1.47	3.19	1.29	0.81	9.4	3.48	4.8	2.4	4.51	0.68	15.69	0.03557	-0.03557
Non-DVT group	63	55	1.53	23.5	No	No	No	100	14	3.53	1.27	5.76	234	0.26	147	44	0.93	2.65	26.9	14	0.22	1.23	4.31	1.08	1.1	7.6	15.92	23	4.58	2.06	0.8	47.69	0.04788	-0.04788
Non-DVT group	43	52.4	1.58	20.99	No	No	No	100	14	3.17	1.8	5.38	173	0.21	111	34.5	0.96	1.33	27.8	16.9	0.29	1.31	2.52	1	0.65	7.5	15.64	11.1	1.39	1.78	0.78	33.16	0.01033	-0.01033
Non-DVT group	34	53.5	1.52	23.16	No	No	No	179	13	2.04	1.43	5.08	262	0.28	129	38.1	1.1	0.83	32.3	18.5	0.11	1.37	4.64	1.16	1.18	15.6	17.01	13	1.21	2.5	0.8	37.6	0.00359	-0.00359
Non-DVT group	33	49.5	1.6	19.34	No	No	No	42	13	3.39	1.94	6.53	302	0.26	120	35.6	0.96	0.93	25.3	15.7	0.32	1.5	3.2	1.15	0.76	316	36.62	11.2	1.6	2.58	1.4	47.16	0.01259	-0.01259
Non-DVT group	49	55	1.62	20.96	No	No	No	116	14	2.55	1.39	4.2	264	0.26	120	38.3	0.89	1.31	25	16.9	0.16	1.2	3.43	0.94	0.81	5.9	3.89	18	1.2	2.48	1.58	63.65	0.05071	-0.05071
Non-DVT group	51	46	1.56	18.9	No	No	No	93	14	5.13	1.56	5.75	229	0.21	122	35.7	0.91	0.72	26.2	17.5	0.21	1.58	2.58	1.23	0.64	28.9	35.66	6	1.73	1.66	1.51	35.94	0.01758	-0.01758
Non-DVT group	26	53.4	1.62	20.35	No	No	No	142	14	4.51	1.61	4.52	285	0.29	143	42.8	0.86	1.72	30.1	18.2	0.32	2.27	2.05	1.5	0.58	14.2		14	0.58	1.96	1.3	45.7	0.00156	-0.00156
Non-DVT group	49	80	1.61	30.86	No	No	No	96	14	2.8	2.06	4.85	154	0.19	123	36.4	1.05	1.16	25.2	16.6	0.18	1.02	2.7	1.1	0.83	8	7.77	5.6	2.4	2.54	0.4	46.68	0.02019	-0.02019
Non-DVT group	44	55	1.59	21.76	No	No	No	285	14	2.48	1.11	4.74	222	0.21	107	32.3	0.94	1.8	29.7	17.1	0.27	1.44	2.55	1.26	0.66	9.6	5.89	22.5	0.75	2.27	1.5	37.31	0.05421	-0.05421
Non-DVT group	45	45.5	1.55	18.94	No	No	No	127	13	2.66	2.09	4.75	334	0.3	100	32.1	0.98	0.62	28.4	17.1	0.45	1.22	2.84	1.06	0.72	18.7		6.5	0.59	3.32	1.6	34.65	0.04414	-0.04414
Non-DVT group	23	65	1.66	23.59	No	No	No	152	14	5.18	1.02	7.18	373	0.34	107	32.3	0.87	0.81	33.2	17.4	0.08	1.47	3.41	1.13	0.79	4.65	2.76	3.6	2.1	3.68	0.7	26.68	0.00058	-0.00058
Non-DVT group	26	53.5	1.67	19.18	No	No	No	46	14	3.37	1.96	5.68	236	0.22	125	36	0.89	0.8	26.2	17.6	0.16	1.13	2.19	0.92	0.56	17.7	14.85	20.1	0.87	1.45	0.7	44.24	0.00206	-0.00206
Non-DVT group	43	64	1.59	25.32	No	No	No	275	13	2.88	1.51	5.06	247	0.28	134	39.5	0.9	1.16	28	16.8	0.24	1.67	2.61	1.32	0.69	4.95	97.87	36.5	0.68	2.85	0.54	19.87	0.08681	-0.08681
Non-DVT group	66	64.5	1.6	25.2	No	No	No	275	15	4.61	2.35	7.97	259	0.26	128	37.2	0.99	0.68	25	17	0.31	1.03	3.9	0.95	0.97	124.8	4.16	8.1	1.2	2.4	0.62	26.54	0.53882	-0.53882
Non-DVT group	38	54	1.57	21.91	No	No	No	128	13	2.17	1.8	3.56	231	0.22	138	41.2	0.89	1.66	27	16	1.28	1.4	4.24	1.15	0.99	24.2		15.62	3.4	4.62	1.2	45.59	0.12077	-0.12077
Non-DVT group	57	64.9	1.58	26	No	No	No	115	15	1.78	1.84	3.3	250	0.26	135	39.9	1.04	0.78	26.4	16.8	0.44	1.7	4.73	1.41	1.11	11.3	23.53	9.8	1.51	2.48	4.4	26.99	0.02055	-0.02055
Non-DVT group	43	49	1.58	19.63	No	No	No	93	14	2.55	2.06	3.74	424	0.36	126	37	0.92	1.17	32	16.8	0.14	1.45	3.37	1.2	0.82	15.6	2	6.2	1.74	5.85	0.5	36.43	0.0017	-0.0017
Non-DVT group	44	54	1.6	21.09	No	No	No	89	14	2.66	1.56	5.23	341	0.29	133	39	0.92	2.16	22.7	16	0.21	1.06	4.01	1.11	1.16	33.7	8.9	9.5	1.6	1.78	1.51	19.67	0.02331	-0.02331
Non-DVT group	43	58	1.58	23.23	No	No	No	94	14	2.84	1.43	5.01	343	0.31	95	29.6	0.91	5.07	29.2	17	0.12	1.16	3.69	1.11	0.95	612.5	16.69	4.1	2.5	4.68	0.6	25.48	0.00516	-0.00516
Non-DVT group	61	65	1.6	25.39	No	No	No	229	14	1.3	1.64	3.27	224	0.21	125	36.4	0.94	1.11	25.7	16.5	0.26	1.36	5.58	1.18	1.31	14.5	10.34	6.5	1.27	3.65	0.7	19.58	0.23971	-0.23971
Non-DVT group	46	58	1.6	22.66	No	No	No	179	14	2.13	2.13	4.38	218	0.2	70	23.6	0.94	4.04	22.5	15.9	0.19	1.44	2.98	1.15	0.75	21.4	2.64	15.8	0.97	2.67	0.51	15.62	0.09583	-0.09583
Non-DVT group	46	58.7	1.59	23.22	No	No	No	117	14	2.74	1.36	4.5	301	0.27	134	39.3	0.84	4.42	22.6	16.3	0.41	1.81	3.42	1.54	0.83	151.4		8	3.5	2.02	1.5	9.5	0.03095	-0.03095
Non-DVT group	47	44	1.56	18.08	No	No	No	178	14	3.21	2.18	6.1	379	0.35	87	28.8	0.89	2.31	20.7	16.6	0.3	1.78	2.97	1.48	0.8	16.7	6.35	5.32	1.2	3.69	0.63	26.1	0.11953	-0.11953
Non-DVT group	47	51	1.6	19.92	No	No	No	176	14	2.5	1.95	5.23	318	0.31	98	30.2	0.93	0.78	26.8	17.2	0.32	1.34	2.91	1.03	0.74	25.8	2.67	19.7	2	2.93	0.51	7.9	0.04839	-0.04839
Non-DVT group	28	52	1.56	21.37	No	No	No	120	14	2.5	3.42	4.98	294	0.29	126	38.2	0.87	1.23	29.2	17	0.35	1.75	2.39	1.21	0.64	12.7		1.64	1.54	4.62	0.7	64.88	0.00271	-0.00271
Non-DVT group	34	62	1.59	24.52	No	No	No	87	15	3.68	1.82	6.18	181	0.21	139	41.8	1.05	0.91	27.3	17.3	0.17	1.11	3.35	1.07	0.91	8.3	37.28	11.2	1.75	2.24	0.9	31.69	0.00296	-0.00296
Non-DVT group	29	56.8	1.59	22.47	No	No	No	163	14	4.18	1.44	6.22	253	0.27	126	36.5	0.95	0.76	28.6	16.6	0.15	1.57	3.1	1.2	0.78	12.35	23.53	18.64	0.65	3.69	0.8	30.83	0.00366	-0.00366
Non-DVT group	52	86.5	1.67	31.02	Yes	No	No	268	14	5.27	1.66	7.7	279	0.25	143	40.5	0.91	0.57	28.9	17.3	0.3	1.09	3.48	1.14	0.96	3.5	2	2.6	1.32	4.84	0.9	69.24	0.37193	-0.37193
Non-DVT group	37	41	1.5	18.22	No	No	No	225	14	2.59	1.94	5.28	225	0.22	119	35.7	0.93	1.64	27.4	17.6	0.11	1.23	2.79	1.03	0.7	19.7	8.9	5.4	0.68	6.52	1	38.85	0.02685	-0.02685
Non-DVT group	47	60	1.64	22.31	Yes	No	No	190	14	3.16	1.47	6.22	216	0.26	131	39.4	0.97	1.4	27.6	16.8	0.34	2.55	3.68	1.2	0.9	16.9	16.69	6	1.14	2.04	1.1	24.08	0.19273	-0.19273
Non-DVT group	27	57	1.61	21.99	No	No	No	153	14	2.11	1.69	5.06	264	0.28	130	39.4	1.03	0.9	28.7	16.9	0.08	1.25	3.15	1.04	0.81	24.3	10.34	6.7	1.94	1.82	0.68	9.9	0.00263	-0.00263
Non-DVT group	37	52	1.53	22.21	No	No	No	127	14	4.32	1.43	6.83	215	0.23	119	37.8	0.89	1.09	31.1	17.7	0.4	1.54	3.04	1.2	0.8	185.4	2.64	15.4	1.24	1.2	0.71	95.62	0.00491	-0.00491
Non-DVT group	31	62	1.6	24.22	No	No	No	80	14	6.66	2.12	9.89	348	0.37	140	42.9	0.94	1.75	32.8	17.6	0.15	1.65	3.39	1.2	0.86	18.62	11.9	15.6	0.68	2.54	2.6	21.55	0.00041	-0.00041
Non-DVT group	20	49.9	1.6	19.49	No	No	No	82	14	3.26	1.99	6.35	370	0.45	119	39.5	0.95	1.59	29.4	18	0.05	1.24	2.25	1.01	0.57	14.63	23.53	11.03	0.74	2.99	1.4	39.33	0.00054	-0.00054
Non-DVT group	31	60	1.6	23.44	No	No	No	78	14	4.05	1.51	5.97	325	0.31	144	42.3	0.99	1.15	29.1	17.1	0.93	1.8	4.03	1.27	0.96	11.4	3.07	9.9	1.98	1.13	1.4	24.86	0.00361	-0.00361
Non-DVT group	30	50.4	1.53	21.53	No	No	No	222	14	4.06	1.73	6.39	221	0.23	114	34.9	0.93	0.79	28	16.5	0.26	1.26	3.43	0.95	0.85	9.5	30.34	15.64	0.64	3.65	0.52	16.54	0.01586	-0.01586
Non-DVT group	35	57	1.63	21.45	No	No	No	80	14	4.08	3.34	7.42	298	0.28	104	30.8	0.95	2.09	26.7	15.9	0.15	1.87	2.59	1.21	0.68	7.7	20.19	8.5	1.83	1.11	0.48	61.49	0.00457	-0.00457
Non-DVT group	46	49	1.58	19.63	Yes	No	No	97	14	4.13	2.26	6.64	363	0.35	150	45.3	1.05	2.55	32.6	16.4	0.23	1.6	3.23	1.31	0.82	11.9		16.1	1.24	1.5	0.3	69.59	0.00818	-0.00818
Non-DVT group	26	53	1.59	20.96	No	No	No	137	15	2	0.95	3.99	311	0.31	120	37.3	0.95	2.25	26.8	16.9	0.24	1.61	4.17	1.14	1.03	14.62	2.5	5.2	0.84	4.51	0.61	9.4	0.00231	-0.00231
Non-DVT group	46	40.3	1.61	15.55	Yes	No	No	176	12	4.87	1.86	7.07	252	0.23	131	39.8	0.92	1.29	27.3	16.6	0.19	2.26	5.11	1.46	0.78	16.3	4.42	7.9	1.05	1.77	0.8	39.94	0.19597	-0.19597
Non-DVT group	33	77.5	1.58	31.04	No	No	No	102	14	2.03	2.15	4.54	253	0.25	140	40.9	0.93	1.06	29.3	16.7	0.32	0.71	2.7	0.76	0.84	81		8.4	1.18	2.36	0.7	21.16	0.00355	-0.00355
Non-DVT group	38	52	1.6	20.31	No	No	No	40	14	1.43	1.16	3.09	285	0.29	125	38	0.85	0.56	29.8	16.9	0.11	2.23	2.19	1.47	0.6	20	11.9	10.5	3.2	1.38	0.57	18.64	0.00066	-0.00066
Non-DVT group	31	53	1.6	20.7	No	No	No	100	14	2.89	2.4	5.53	262	0.3	126	38.6	0.86	0.64	30.6	17.1	0.22	1.33	4.26	0.97	0.96	41.4	23.53	10.1	3.73	2.95	0.64	15.62	0.00162	-0.00162
Non-DVT group	25	45	1.52	19.48	No	No	No	85	14	2.8	1.93	5.1	225	0.24	132	37.8	0.87	0.46	28.6	16.9	0.25	1.12	3.07	0.97	0.8	12.4	3.07	3.18	2.4	3.65	0.51	47.69	0.00142	-0.00142
Non-DVT group	46	63	1.55	26.22	No	No	No	149	14	2.67	2.1	5.21	208	0.25	108	34.1	0.89	1.39	23.4	16.5	0.4	1.35	2.52	1.06	0.73	31.1	30.34	16.6	1.5	1.68	0.59	33.16	0.07905	-0.07905
Non-DVT group	39	60.2	1.64	22.38	No	No	No	85	14	3.47	2.06	7.26	227	0.22	126	36.9	1.06	2.43	28.6	16.7	0.07	1.23	2.31	0.96	0.61	10.4	20.19	15.31	0.67	4.62	0.63	37.6	0.00403	-0.00403
Non-DVT group	26	55	1.58	22.03	No	No	No	70	14	4.1	1.88	7.79	286	0.27	125	38.1	0.87	0.99	32.9	16.3	0.34	1.26	2.69	1.05	0.68	12.3	11.9	5.7	1.04	0.99	3.6	47.16	0.00042	-0.00042
Non-DVT group	37	50.5	1.62	19.24	No	Yes	No	142	14	3.79	2.59	6.49	354	0.37	111	37.5	0.84	1	32.9	15.9	0.11	1.45	3.49	1.41	0.91	12.2	23.53	5.4	0.84	1.62	0.87	14.69	0.00094	-0.00094
Non-DVT group	42	64	1.64	23.8	No	No	No	150	14	2.69	2.22	5.05	301	0.32	123	35.9	0.84	2.11	25.2	17.1	0.72	1.01	3.45	0.98	1.01	4.7	3.07	6.3	0.51	1.84	0.47	20.64	0.06785	-0.06785
Non-DVT group	60	80	1.67	28.69	Yes	No	No	125	14	2.46	2.11	4.52	252	0.26	134	40.2	0.97	1.18	24.9	17.9	0.15	1.03	2.54	1.02	0.7	23.6	30.34	21.5	1.5	3.68	0.65	15.69	0.2458	-0.2458
Non-DVT group	57	51	1.59	20.17	Yes	No	No	37	14	2.9	2.97	5.93	162	0.17	125	39.3	0.95	0.89	28.5	17	0.14	1.76	3.88	1.29	0.93	32	20.19	23	4.58	2.06	1.6	31.73	0.02058	-0.02058
Non-DVT group	32	65	1.63	24.46	No	No	No	83	15	3	1.74	5.52	261	0.28	109	35.7	0.89	1.2	28.1	16.8	0.25	1.08	2.65	0.97	0.7	33.2		11.1	1.39	1.78	0.69	18.97	0.00267	-0.00267
Non-DVT group	26	50	1.63	18.82	No	No	No	99	15	1.95	1.92	3.62	273	0.27	132	40.1	0.95	0.99	27.3	16.8	0.19	1.38	2.95	1.12	0.84	76.5	2.83	13	1.21	2.5	1.52	29.19	0.0022	-0.0022
Non-DVT group	34	62	1.63	23.34	No	No	No	310	14	5.39	1.66	7.64	270	0.24	105	32.6	0.91	1	26.5	16.8	0.23	1.41	2.51	1.25	0.76	18.9	6.27	11.2	1.6	2.58	1.51	20.69	0.07168	-0.07168
Non-DVT group	36	51	1.55	21.23	No	No	No	135	14	3.87	1.98	6.06	216	0.21	135	39.2	0.9	1.37	26.7	17.9	0.21	1.48	2.31	1.43	0.76	9.4	56.12	18	1.2	2.48	0.57	47.69	0.00513	-0.00513
Non-DVT group	44	51	1.58	20.43	No	No	No	240	14	2.27	1.99	4.27	269	0.26	135	39.2	0.92	0.67	26.5	17.2	0.1	1.34	4.47	1.21	1.54	9.2	10.68	6	1.73	1.66	0.51	33.16	0.0544	-0.0544
Non-DVT group	31	58	1.6	22.66	No	No	No	115	14	3.09	1.99	5.5	266	0.26	131	39	0.91	1.04	24.1	16.7	0.06	1.65	3.02	1.27	0.8	20.8		14	0.58	1.96	0.68	37.6	0.00618	-0.00618
Non-DVT group	30	49	1.56	20.13	No	No	No	65	14	4.45	1.57	7.37	266	0.28	124	38.8	0.91	1.58	25.6	17.4	0.17	2.3	3.25	1.63	0.8	26.6	9.75	5.4	1.24	2.84	0.7	47.16	0.00141	-0.00141
Non-DVT group	32	50	1.57	20.28	No	No	No	120	14	5.73	1.52	8.33	252	0.27	101	32.4	0.88	1.93	25.5	17.1	0.17	2.02	3.01	1.48	0.86	15.8	7.86	9.2	2.7	2.65	0.54	21.64	0.00388	-0.00388
Non-DVT group	44	52	1.55	21.64	No	No	No	157	14	2.6	2.01	4.8	383	0.36	106	34.7	1.04	4.97	24.4	17	0.35	1.53	3.4	1.23	1	14.4		10.7	1.04	2.26	0.65	24.68	0.04148	-0.04148
Non-DVT group	24	54	1.62	20.7	No	No	No	141	14	8.68	2.39	10.23	228	0.24	125	37.9	0.96	1.07	27.1	18.1	0.17	1.66	2.94	1.11	0.85	50	10.74	8.6	1.56	3.16	0.8	38.09	0.00395	-0.00395
Non-DVT group	29	50	1.57	20.28	No	No	No	115	14	3.17	1.07	5.14	243	0.24	143	42.6	0.92	1.07	29.3	18.3	0.07	1.81	3.7	1.33	0.9	18.62		9.7	1.84	2.85	0.87	27.69	0.00111	-0.00111
Non-DVT group	24	53	1.63	19.95	No	No	No	192	14	2.9	1.81	5.43	286	0.3	133	40.4	0.99	1.07	27.6	17.3	0.41	1.4	2.49	1.01	0.75	15.9	23.56	6.9	0.58	4.51	0.51	32.64	0.0112	-0.0112
Non-DVT group	42	58.3	1.64	21.68	No	No	No	87	15	2.11	1.19	4.8	253	0.26	131	39.3	0.81	1.07	32.8	18.6	0.23	1.26	2.49	1.1	0.78	7.2		6.4	1.45	1.43	0.58	21.63	0.0009	-0.0009
Non-DVT group	26	47	1.68	16.65	No	No	No	162	13	2.97	1.49	4.77	169	0.17	129	39.5	0.84	0.95	28.2	17.7	0.16	1.85	2.96	1.26	0.83	16.6	10.57	8.4	3.44	3.5	0.64	18.62	0.0097	-0.0097
Non-DVT group	27	55	1.58	22.03	No	No	No	335	14	2.69	2.21	5.14	240	0.26	135	39	0.9	0.73	27.1	17	0.17	1.74	2.91	1.33	0.85	31.5	4	22.4	2.64	1.23	1.1	28.57	0.0695	-0.0695
Non-DVT group	38	53	1.6	20.7	No	No	No	180	14	3.51	1.82	5.1	318	0.32	99	32.5	0.84	2.16	28.5	18.5	0.15	1.77	2.83	1.28	0.8	15.6		6.4	1.51	4.51	0.68	10.62	0.0085	-0.0085
Non-DVT group	40	66	1.65	24.24	No	No	No	124	13	2.67	2.09	4.94	481	0.43	104	31.1	0.97	1.88	20.6	15.4	1.62	1.63	2.86	1.3	0.92	7.9	63.5	7.1	0.97	2.26	0.7	9.7	0.19397	-0.19397
Non-DVT group	43	51	1.58	20.43	Yes	No	No	80	14	1.8	1.95	3.6	235	0.2	136	40.8	0.98	0.8	25.8	17.4	0.13	1.88	3.49	1.45	0.97	12.9		6.5	1.09	2.98	0.54	23.72	0.01684	-0.01684
Non-DVT group	39	56	1.67	20.08	No	No	No	197	14	3.44	1.78	6.01	196	0.2	130	38.8	1.03	1.37	23.9	16.7	0.24	1.73	3.35	1.23	0.9	90.3	2.7	29.7	0.92	2.2		26.61	0.0653	-0.0653
Non-DVT group	42	50	1.53	21.36	No	No	No	145	14	4.31	3	6.68	247	0.26	127	38.1	0.97	0.78	26.3	17.6	0.18	1.31	3.18	1.14	0.96	40.1	11.99	9.7	157.5	1.16	1.1	30.79	0.01559	-0.01559
Non-DVT group	34	57	1.55	23.73	No	No	No	105	14	3	2.16	4.5	304	0.27	144	43	0.84	2.27	28.8	17.6	0.15	1.89	3.22	1.49	0.88	18.62	30.88	4.8	3.4	3.65		18.66	0.00122	-0.00122
Non-DVT group	40	70	1.6	27.34	No	No	No	248	14	2.86	2.39	4.67	264	0.25	129	38.5	0.89	1.66	24.6	17.9	1.28	1.7	2.22	1.22	0.71	17.7	198.93	18.3	1.34	4.95	1	7.9	0.3227	-0.3227
Non-DVT group	32	54.2	1.59	21.44	No	No	No	176	15	5.44	1.61	7.64	330	0.32	111	34.8	0.91	0.9	28.7	18.1	0.4	1.88	2.83	1.35	0.87	30.4		5.4	4.2	2.58	0.7	32.81	0.00706	-0.00706
Non-DVT group	35	55	1.5	24.44	No	No	No	175	14	5.05	1.86	7.61	283	0.3	107	35.2	0.82	1.96	24.1	16.4	1.02	1.15	1.89	1.09	0.56	37.6	24.13	7.5	1.4	3.92	0.68	9.4	0.0715	-0.0715
Non-DVT group	24	87	1.56	35.75	No	No	No	130	14	2.23	2.59	4.74	584	0.55	61	23.3	0.94	0.87	22.3	15.3	0.16	0.96	2.41	0.92	0.71	8.4	4.6	6.2	1.68	2.51	0.7	8.2	0.00806	-0.00806
Non-DVT group	43	50	1.58	20.03	No	Yes	No	150	14	3.98	2.37	7.21	349	0.33	126	37.8	1.14	0.46	25.5	16.2	0.78	1.55	3.9	1.19	1.06	43	290.51	6.08	1.56	2.58	0.68	15.9	0.05797	-0.05797
Non-DVT group	44	67.2	1.55	27.97	No	No	No	150	14	2.89	1.31	5.13	328	0.31	110	39.2	1.11	2.09	26.1	16.8	0.37	1.39	1.94	1.33	0.62	28	12.95	11.7	1.73	1.29	0.7	14.95	0.01636	-0.01636
Non-DVT group	37	49	1.61	18.9	No	No	No	80	14	2.69	2.32	5.09	304	0.3	131	40	0.92	1.89	26.2	17	3.04	1.44	3.38	1.15	0.97	97.6	9.5	8.3	0.5	1.94	0.54	42.9	0.3616	-0.3616
Non-DVT group	32	52	1.62	19.81	No	No	No	93	14	2.63	2.1	4.77	250	0.26	130	38.8	1.1	2.01	25.4	17.2	0.12	1.81	2.8	1.34	0.79	12.3	10.85	15.62	1.5	2.58	0.68	20.65	0.00334	-0.00334
Non-DVT group	33	57	1.6	22.27	No	No	No	93	15	4.65	1.52	7.6	193	0.23	121	36.4	0.83	1.91	25.9	17.8	0.18	1.54	1.99	1.15	0.61	42.2	184.36	11.4	0.72	8.82	0.7	48.65	0.00532	-0.00532
Non-DVT group	39	64.2	1.58	25.72	No	No	No	175	14	2.89	1.53	5.61	353	0.31	151	44	0.98	4.06	29.7	16.2	0.29	1.09	3.45	1.07	1.09	27.1		8.1	2.62	1.9	0.54	15.98	0.00857	-0.00857
Non-DVT group	35	48	1.58	19.23	No	No	No	125	14	3.32	1.55	5.38	257	0.24	135	39.7	0.91	1.42	26.5	17.5	0.14	1.57	2.52	1.24	0.74	21	15.43	8.4	1.13	3.33	0.5	20.69	0.00547	-0.00547
Non-DVT group	28	59	1.55	24.56	No	No	No	100	14	3.09	1.39	6.21	413	0.42	120	35.7	0.94	1.02	29.3	19	0.35	1.4	3.07	1.13	0.86	31.9	7.88	13.8	1.81	3.26		16.16	0.00141	-0.00141
Non-DVT group	37	68	1.63	25.59	No	No	No	195	14	2.67	1.75	5.22	389	0.34	142	41	1.03	2.08	23.8	16.5	0.19	1.43	3.63	1.18	1.02	18.7	7.7	9.9	2.91	3.05	2	17.62	0.04093	-0.04093
Non-DVT group	47	53	1.57	21.5	No	No	No	175	15	5.17	1.73	7.02	345	0.36	140	42.1	0.94	0.89	36.4	17.5	0.09	1.12	3.25	1.02	1.02	97.5	8.03	11.4	1.12	3.01	0.6	15.39	0.00238	-0.00238
Non-DVT group	24	57	1.6	22.27	No	No	No	196	14	2.26	2.58	4.93	307	0.3	136	40.3	0.96	1.43	28.2	18.2	0.23	1.35	2.29	1.13	0.6	42.6	2.87	5.29	1.87	2.42		61.59	0.00655	-0.00655
Non-DVT group	30	48.8	1.62	18.59	No	No	No	140	14	8.17	1.07	11.52	214	0.24	113	36	0.91	2.62	27.6	18.1	0.16	1.58	2.98	1.11	0.85	21.7	40.8	9.1	1.01	4.84	3.2	36.2	0.00532	-0.00532
Non-DVT group	45	70	1.62	26.67	No	No	No	176	14	1.94	1.05	4.75	320	0.34	98	30.4	0.88	0.64	27.1	16.1	0.45	1.45	2.8	1.22	0.83	6.7	15.7	22.5	1.15	2.45	0.8	50.29	0.04104	-0.04104
Non-DVT group	33	45.2	1.56	18.57	No	No	No	135	14	1.92	1.01	3.9	280	0.31	138	41.6	0.96	0.81	26.7	18.5	0.23	1.68	2.39	1.24	0.7	12.1	4.16	6.7	1.28	2.3	0.68	47.69	0.00707	-0.00707
Non-DVT group	34	58.6	1.65	21.52	No	No	No	115	15	3.72	1.99	5.75	345	0.32	126	40.1	1.08	1.24	26.2	17.2	0.38	1.53	3	1.22	0.87	22.6	2.29	6.6	0.98	2.66	0.7	33.16	0.00513	-0.00513
Non-DVT group	44	62	1.68	21.97	No	No	No	135	12	4.33	1.41	6.59	273	0.29	135	40.1	0.99	2.24	24.9	17.2	0.35	1.31	3.2	1.13	1.09	14.4	5.83	14.6	0.65	1.58	0.54	37.6	0.10387	-0.10387
Non-DVT group	32	56	1.67	20.08	No	No	No	120	13	2.54	1.67	4.52	280	0.26	120	36.5	1.09	0.69	25.2	17.3	0.41	1.68	3.22	1.29	0.88	205.5	4.73	6.2	0.31	2.54	2	47.16	0.02068	-0.02068
Non-DVT group	43	43.6	1.6	17.03	No	No	No	152	14	2.64	1.78	5.2	294	0.31	127	40.2	0.97	1.09	27.1	17.3	0.25	2.05	2.78	1.46	0.8	16.62	2.46	6.22	2.24	3.65	0.4	24.45	0.01307	-0.01307
Non-DVT group	29	49	1.58	19.63	No	No	No	56	15	4.68	1.25	6.2	232	0.23	141	39.2	0.97	0.72	26.1	16.7	0.11	1.59	2.98	1.23	0.85	15.6	63.96	9.5	1.73	7.35	0.68	15.68	0.00131	-0.00131
Non-DVT group	38	61	1.53	26.06	No	No	No	175	14	1.95	2.31	3.46	261	0.25	144	41	0.94	1.18	26.2	15.9	0.34	1.64	4.29	1.29	1.24	7.7	61.88	7.9	1.5	4.96	0.7	9.4	0.01493	-0.01493
Non-DVT group	40	53.4	1.58	21.39	No	No	No	120	14	3.18	2.15	4.89	251	0.27	116	34.9	0.96	1.14	28.5	17.4	0.19	1.18	1.75	0.98	0.53	18.62	26.05	7.5	2.4	5.84	0.54	48.6	0.00824	-0.00824
Non-DVT group	28	51.3	1.61	19.79	No	No	No	47	14	2.38	1.94	4.91	386	0.37	130	39.8	0.84	1.29	24.9	16.5	0.12	1.89	3.03	1.35	0.9	30.5		4.5	0.91	5.21	0.68	15.6	0.00139	-0.00139
Non-DVT group	28	78	1.78	24.62	No	No	No	75	14	3.12	1.7	6.15	277	0.26	138	41.2	0.8	0.75	26.5	17.7	0.1	2	3.3	1.53	0.9	37.9		18.2	3.35	1.43	0.7	15.62	0.00126	-0.00126
Non-DVT group	27	54	1.58	21.63	No	No	No	95	14	2.8	1.43	4.76	340	0.34	143	43	0.93	0.62	30.2	18.2	0.08	1.28	3.46	1.11	0.97	218.2	3.69	10.4	2.39	0.84	0.54	32.97	0.00085	-0.00085
Non-DVT group	43	62	1.6	24.22	No	No	No	120	14	2.65	1.64	5.21	269	0.25	121	36.8	0.86	0.72	23.6	17.1	0.29	1.42	3.37	1.06	1	25.1		13.3	1.14	1.94	0.97	71.7	0.04976	-0.04976
Non-DVT group	35	61.7	1.65	22.66	No	No	No	95	14	1.97	2.03	3.91	184	0.21	140	41.8	0.9	1.52	23.6	17.5	1.17	1.83	2.99	1.28	0.87	10.2	36.95	9.8	1.75	2.15	0.4	33.48	0.04732	-0.04732
Non-DVT group	48	64	1.6	25	No	No	No	145	14	3.38	2.16	6.44	262	0.29	113	35.6	0.91	0.78	21.4	16.8	0.24	1.61	2.79	1.73	0.8	17.9	8.08	6.7	0.91	4.51	1	47.69	0.04097	-0.04097
Non-DVT group	48	56.5	1.5	25.11	Yes	Yes	No	126	14	2.67	2.47	5.4	313	0.3	116	39	0.83	1.15	28.7	19.8	0.16	1.57	3.02	1.28	0.9	10.7	8.18	4.8	0.54	2.65	0.8	33.16	0.0253	-0.0253
Non-DVT group	26	62.6	1.65	22.99	No	No	No	113	14	6.06	2.13	9.26	240	0.24	130	39.7	1.03	0.82	24.6	16.9	0.56	1.62	3.94	1.29	1	11.3		13.8	0.94	5.34	0.7	37.6	0.0079	-0.0079
Non-DVT group	26	64	1.66	23.23	No	No	No	115	14	2.63	2.75	4.63	241	0.24	135	39.5	0.88	1.94	29.3	17.8	0.21	1.75	3.96	1.25	1.08	12.7	2.84	7.2	1.59	2.19	0.7	47.16	0.0016	-0.0016
Non-DVT group	42	65	1.65	23.88	No	No	No	75	14	3	2.22	4.05	258	0.28	130	39.6	0.92	1.47	24.8	17.3	0.15	1.23	3.85	1.08	1.1	11.9		12.6	1.88	2.48	1.2	15.99	0.0098	-0.0098
Non-DVT group	27	52	1.65	19.1	No	No	No	75	14	2.86	1.35	5.28	206	0.22	131	39.9	0.93	0.94	27	17.5	0.39	2.35	2.8	1.75	0.82	12.7	4.3	6.5	1.35	1.95	0.8	20.87	0.00095	-0.00095
Non-DVT group	31	59	1.67	21.16	No	No	No	117	14	5.44	1.83	4.3	237	0.23	146	43.3	0.9	1.83	25.5	18.3	0.09	2.07	2.82	1.52	0.87	27.5	17.47	11.1	0.86	0.91	1	53.15	0.00409	-0.00409
Non-DVT group	30	71	1.57	28.8	No	No	No	145	14	5.05	2.6	8.19	381	0.36	72	27.6	1.06	1.37	22.1	16	0.28	1.15	4.07	0.97	1.1	24.3	18.12	10.4	1.99	1.55	0.8	35.6	0.02759	-0.02759
Non-DVT group	34	58.8	1.58	23.55	No	No	No	108	15	2.23	2.11	5.72	362	0.35	114	33.8	0.97	1.08	27.1	16.9	0.28	1.41	2.81	1.04	0.83	7.01	15.91	13.94	1.1	7.75	0.54	28.69	0.00588	-0.00588
Non-DVT group	46	50	1.58	20.03	No	No	No	140	14	3.98	1.63	3.95	347	0.33	111	34.3	0.89	0.43	28.9	17.2	0.13	1.83	3.53	1.37	1.04	8.9	42.76	8.6	5.93	7.65	0.85	18.45	0.00707	-0.00707
Non-DVT group	30	67	1.65	24.61	No	No	No	95	14	2.89	1.68	4.93	221	0.19	136	39.8	0.89	2	29.3	16.6	0.19	1.09	2.7	1.01	0.85	38.5	13.05	17.4	2.17	1.96	1	64.19	0.00226	-0.00226
Non-DVT group	43	57.2	1.6	22.34	No	No	No	160	14	2.69	2.19	4.83	230	0.23	133	39.6	0.91	1.54	23.7	16	0.29	1.13	3.2	0.95	1.07	11.4	16.5	13.2	1.65	1	0.89	54.85	0.08374	-0.08374
Non-DVT group	28	66.5	1.58	26.64	No	No	No	100	14	2.63	1.28	6.19	289	0.11	140	41.5	0.91	1.87	23.4	17.6	1.54	1.49	2.92	1.34	0.88	13.2	31.65	6.4	0.97	3.62	1.1	32.96	0.0349	-0.0349
Non-DVT group	33	62	1.62	23.62	No	No	No	170	13	4.65	2.12	9.33	373	0.38	105	32.3	0.93	1.32	23.9	16.5	0.52	1.52	2.03	1.16	0.63	13.9	12.78	9.6	2.65	2.17	0.87	32.95	0.0651	-0.0651
Non-DVT group	41	59.7	1.55	24.85	No	No	No	118	15	2.89	1.79	6.45	214	0.24	142	41	0.88	2.6	25.3	16.5	0.23	1.24	3.71	1.2	1.09	11.6	11.9	10.5	1.5	5.54	4.5	23.21	0.01094	-0.01094
Non-DVT group	27	79	1.61	30.48	No	No	No	355	14	3.32	2.03	4.47	239	0.29	153	44.6	1.01	1.32	23.9	17.4	0.33	1.11	4.19	1.09	1.22	32	23.53	5.9	2.65	3.37	2.51	28.99	0.18639	-0.18639
Non-DVT group	33	84	1.69	29.41	No	No	No	137	15	3.09	3.24	5.83	357	0.35	126	37.8	1	1.22	30.2	17.2	0.22	1.05	3.49	0.98	1	18.62	3.07	15.66	3.97	4.51	2.3	32.98	0.00234	-0.00234
Non-DVT group	45	52	1.56	21.37	Yes	No	No	140	14	2.67	2.79	11.44	379	0.42	103	32.6	0.95	2.21	28.7	17.6	0.11	1.33	3.17	1.14	0.95	19.1	30.34	7.8	1.33	2.03	0.7	30.87	0.03087	-0.03087
Non-DVT group	29	56.4	1.59	22.31	No	No	No	125	14	5.17	2.11	6.1	314	0.3	138	41.8	0.9	1.3	30.5	17	0.2	1.52	2.66	1.22	0.79	10.2	20.19	3.9	0.64	2.65	1.5	43.62	0.0014	-0.0014
Non-DVT group	29	51.2	1.57	20.77	No	No	No	135	14	2.26	1.77	4.77	304	0.27	132	39	0.92	1.06	29.7	16.4	0.13	1.7	2.28	1.25	0.66	23.3		6.3	1.15	2.66	0.95	37.05	0.00174	-0.00174
Non-DVT group	31	57	1.61	21.99	No	No	No	102	14	8.17	1.59	2.69	264	0.3	121	36.4	0.91	1.7	25.8	16.6	0.17	1.72	4.76	1.24	1.27	8.5		17.4	1.16	1.73	0.87	47.69	0.00459	-0.00459
Non-DVT group	34	47	1.64	17.47	No	No	No	89	15	1.94	2.22	6.71	264	0.26	127	38.1	1.15	1.56	26.7	16.9	0.2	1.73	2.87	1.32	0.87	24.8	5.81	15.7	1.4	3.62	1	33.16	0.00344	-0.00344
Non-DVT group	48	63	1.6	24.61	No	No	No	115	14	1.92	1.95	7.65	358	0.33	109	35.3	0.9	0.66	23.9	17.6	0.17	1.34	3.88	1.21	1.14	8.4		15.1	1.48	1.62	0.81	37.6	0.0304	-0.0304
Non-DVT group	41	56.6	1.53	24.18	No	No	No	132	14	3.72	1.33	4.81	313	0.3	98	33.8	0.94	3.44	20.6	16.6	0.26	1.85	3.83	1.52	1.13	14.3	15.29	7.8	1.91	2.31	0.45	47.16	0.03705	-0.03705
Non-DVT group	37	45	1.52	19.48	No	No	No	184	14	4.33	1.68	6.88	293	0.29	111	34.9	0.86	0.71	23.7	16.1	0.38	1.42	2.8	1.4	0.98	101.3	7.03	17.5	0.95	2.1	2.9	15.62	0.02891	-0.02891
Non-DVT group	45	55	1.65	20.2	No	No	No	107	15	2.54	1.25	4.18	476	0.45	112	36.1	0.95	1.15	27.7	17.5	0.54	2.24	2.26	1.52	0.72	22.1	14.53	11.4	2.28	5.68	0.84	18.6	0.00644	-0.00644
Non-DVT group	44	53	1.59	20.96	No	No	No	155	14	2.64	1.59	4.26	300	0.35	117	36.3	1.16	2.07	24.4	16.3	0.77	1.35	3.53	1.22	1.1	83.3	29.77	4.8	4.2	3.64	0.8	9.4	0.07417	-0.07417
Non-DVT group	45	57.5	1.65	21.12	No	No	No	199	14	4.68	2	7.7	308	0.27	137	40.8	0.89	1.02	25.6	16.7	0.2	1.64	3.2	1.29	0.92	73	83.49	7.6	0.73	2.22	1.5	15.66	0.04974	-0.04974
Non-DVT group	51	63	1.62	24.01	Yes	No	No	183	15	1.95	2.27	6.52	328	0.32	90	29.9	0.9	0.45	25.7	13.8	0.55	1.91	2.73	1.42	0.8	207.7	28.13	23.3	1.51	0.93	1.2	20.95	0.49882	-0.49882
Non-DVT group	31	70	1.65	25.71	No	No	No	123	13	3.18	2.11	5.48	289	0.28	71	25.3	0.87	0.98	21.7	17.1	0.13	1.57	2.26	1.36	0.71	32.5		14.3	1.37	1.46	0.9	4.99	0.01718	-0.01718
Non-DVT group	43	57.6	1.55	23.98	No	No	No	92	14	2.38	1.69	9.44	271	0.25	111	34.3	1.12	1.1	23.9	15.9	0.38	1.57	2.93	1.37	0.91	31.7	182.75	7.4	5.4	1.8	0.9	23.36	0.01372	-0.01372
Non-DVT group	51	56	1.66	20.32	Yes	No	No	70	14	3.12	0.99	3.21	286	0.28	121	36.4	0.98	1.48	27.6	17	0.11	1.63	3.32	1.29	1	11.7	3.94	5.4	0.68	2.84	0.7	47.69	0.028	-0.028
Non-DVT group	27	45.8	1.59	18.12	No	No	No	117	14	2.8	1.48	8.52	260	0.28	121	36.2	0.9	2.06	31.1	17.8	0.65	1.21	2.32	1.02	0.74	7.5	14.47	8.35	1.46	3.25	0.62	33.16	0.00243	-0.00243
Non-DVT group	21	56	1.65	20.57	No	No	No	67	14	2.65	1.99	3.97	174	0.22	133	39.7	0.97	0.7	30.5	17.6	0.11	1.63	2.43	1.23	0.71	8.7		5.4	0.69	2.51	0.54	37.6	0.0003	-0.0003
Non-DVT group	33	49.5	1.65	18.18	No	No	No	140	14	1.97	1.91	6.51	203	0.21	140	42	0.98	2.19	29.3	17.1	0.48	1.76	2.64	1.39	0.75	16.2	14.82	7.9	1.85	1.31	0.3	47.16	0.00481	-0.00481
Non-DVT group	45	62	1.63	23.34	No	Yes	No	127	14	3.38	1.39	7.36	405	0.43	87	29.7	0.97	1.47	21.4	16.1	0.21	1.38	3.07	1.12	0.8	14	2.47	12.4	0.5	1.02	0.51	34.84	0.07533	-0.07533
Non-DVT group	42	60	1.55	24.97	Yes	No	No	90	14	2.67	1.97	4.49	325	0.29	146	43.8	1.09	1.11	26.3	17.1	0.42	1.52	3.45	1.2	0.96	14.5	9.98	15.5	5.94	3.27	0.28	36.54	0.03423	-0.03423
Non-DVT group	30	40	1.61	15.43	No	No	No	170	14	6.06	1.12	5.74	245	0.27	126	38.1	0.95	1.08	30	17.9	0.27	1.82	3.34	1.37	0.97	9.3	7.5	7.1	0.63	2.55	0.6	26.65	0.00307	-0.00307
Non-DVT group	31	60	1.6	23.44	No	No	No	87	15	2.63	1.87	4.6	231	0.21	129	39.1	0.92	1.09	28.3	18.1	0.09	2.09	3.13	1.49	0.9	9.8	13.73	1.68	0.41	3.51	0.7	25.64	0.00095	-0.00095
Non-DVT group	32	58	1.65	21.3	No	No	No	205	14	1.96	1.42	5.64	301	0.3	141	41.6	0.96	0.71	26.5	16.4	0.39	1.64	2.54	1.27	0.77	19.5	9.84	17.2	1.4	4.31	0.7	15.65	0.02005	-0.02005
Non-DVT group	31	60	1.68	21.26	No	No	No	67	14	3.05	2	5.58	235	0.25	139	41.3	0.99	1.28	25.5	16.7	0.21	1.63	2.52	1.29	0.77	10.9	3.69	5.4	1.84	2.68	0.34	47.69	0.0032	-0.0032
Non-DVT group	50	72	1.6	28.13	Yes	No	No	135	14	5.42	1.62	7.06	290	0.28	146	41.7	0.96	1.95	26.8	16.2	0.26	1.01	3.37	0.96	0.98	15.62	11.9	5.6	0.94	4.51	0.51	33.16	0.10984	-0.10984
Non-DVT group	24	45	1.62	17.15	No	No	No	117	14	4.84	1.03	7.42	244	0.24	144	43	1.09	1.79	28.5	17.1	0.25	1.94	2.44	1.34	0.73	14.3	23.53	8.2	0.73	2.31	0.8	37.6	0.00153	-0.00153
Non-DVT group	43	60.7	1.6	23.71	No	No	No	130	14	3.68	1.29	4.41	243	0.28	113	35.2	0.93	0.97	26.3	14.7	0.12	1.48	3.33	1.16	0.9	1.5	3.07	7	0.71	1.05	0.81	47.16	0.01515	-0.01515
Non-DVT group	34	60	1.63	22.58	No	No	No	140	14	4.3	1.81	5.6	230	0.27	101	35.2	0.92	0.85	24.9	16.5	0.2	1.95	2.94	1.5	0.85	18.66	30.34	1.68	1.54	2.68	0.57	32.42	0.00811	-0.00811
Non-DVT group	45	51.5	1.58	20.63	No	No	No	145	14	2.48	1.76	4.31	272	0.26	135	42	0.94	0.89	24	16.5	0.26	1.59	4.17	1.26	1	19.4	20.19	15.6	1.25	10.65	0.69	29.01	0.039	-0.039
Non-DVT group	40	65.5	1.6	25.59	No	No	No	128	14	4.6	1.82	7.89	418	0.35	152	44.3	1.08	1.77	27.3	16.5	0.45	1.42	3.57	1.26	1.08	4.8	11.9	7.2	0.83	1.7	0.9	35.31	0.01065	-0.01065
Non-DVT group	23	65	1.63	24.46	No	No	No	83	14	1.63	2.78	4.83	261	0.28	109	35.7	0.92	1.48	28.1	16.8	0.25	1.08	2.65	0.97	0.7	6.5	23.53	12.2	1.11	1.86	0.84	15.98	0.00121	-0.00121
Non-DVT group	38	56	1.63	21.08	No	No	No	65	14	2.85	1.74	7.06	338	0.33	139	40.6	0.94	0.57	28	17.1	0.34	1.12	6.56	0.92	1.48	26.4	3.07	16.8	2.68	2.02	0.5	22.13	0.00478	-0.00478
Non-DVT group	48	56	1.59	22.15	No	No	No	110	14	1.94	1.84	3.8	261	0.26	122	36.7	0.84	0.62	30.3	17.1	0.17	1.25	3.32	1.01	0.8	10.6	30.34	10.3	2.79	4.25	1	23.67	0.0068	-0.0068
Non-DVT group	45	50	1.58	20.03	No	No	No	102	15	2.66	1.59	6.2	324	0.31	101	30.8	1.06	0.83	27.1	17.2	0.22	1.03	3.36	0.9	0.95	6.2	20.19	8.7	1.38	2.31	1.3	74.13	0.01952	-0.01952
Non-DVT group	43	51.2	1.57	20.77	No	No	No	128	14	1.76	2.23	2.81	321	0.32	109	33.1	0.93	0.53	26.8	15.7	0.11	1.96	3.71	1.46	0.91	18.8	3.52	6.9	1.8	4.64	0.57	18.96	0.00688	-0.00688
Non-DVT group	51	61.5	1.54	25.93	No	No	No	115	14	4.44	2.02	6.75	261	0.25	131	38.4	0.97	1.35	31.5	17.4	0.27	0.93	4.1	0.85	1.15	41.4	6	5.6	4.18	2.5	0.68	9.8	0.00781	-0.00781
Non-DVT group	26	55	1.65	20.2	No	No	No	125	13	2.4	1.55	4.77	258	0.29	126	37.8	0.96	1.13	25.3	16.3	0.12	1.62	3.4	1.19	0.86	10.9	2	8	1.33	2.53	1.7	34.11	0.0078	-0.0078
Non-DVT group	48	58	1.66	21.05	No	No	No	135	13	2.04	2.43	6.48	341	0.32	112	34	0.96	1.78	27.1	15.8	0.29	1.85	3.08	1.47	0.81	6.1	5.6	4.7	0.81	4.71	1.64	26.65	0.04235	-0.04235
Non-DVT group	33	48	1.55	19.98	No	No	No	138	14	3.64	1.97	4.37	315	0.29	121	35.9	0.85	0.84	23.9	15.3	0.27	1.09	3.22	0.96	0.81	16.6	37.29	11.1	1.69	1.12	0.9	15.99	0.01864	-0.01864
Non-DVT group	33	53.3	1.56	21.9	No	No	No	70	14	2.4	1.33	4.73	183	0.22	149	43.1	0.9	1.17	33.1	16.8	0.19	1.57	4.45	1.29	1.08	11.66	10.62	11.1	1.73	2.21	1.2	26.65	0.00033	-0.00033
Non-DVT group	65	49	1.37	26.11	No	No	No	296	14	2.91	2.24	5	380	0.39	118	36.3	0.86	1.24	29.2	16.3	0.5	0.96	3.05	0.97	0.91	18.62	15.68	12.6	2.55	4.23	0.8	32.67	0.36916	-0.36916
Non-DVT group	41	74	1.58	29.64	No	No	No	80	14	5.02	2.67	3.97	260	0.33	130	38.6	0.9	1	24.5	16.8	0.43	1.13	3.73	1.12	1.12	15.4	21.39	17.5	2.36	3.09	1.52	15.96	0.01175	-0.01175
Non-DVT group	46	62.4	1.55	25.97	No	No	No	106	14	2.86	2.16	4.06	238	0.28	146	43.6	0.88	0.8	28	18.2	0.12	1.63	3.15	1.19	0.79	10.69	3.52	9.1	1.14	2.54	1	19.87	0.00649	-0.00649
Non-DVT group	50	63	1.58	25.24	No	No	No	158	15	1.47	1.38	8.4	255	0.25	140	40.2	0.94	1.71	31.2	17.1	0.21	0.88	2.35	0.96	0.74	15.9	6	7.7	0.96	1.25	0.6	20.92	0.03134	-0.03134
Non-DVT group	29	51.8	1.55	21.56	No	No	No	120	14	3.53	1.51	7.7	284	0.29	147	42.5	0.89	1.33	28.9	18.4	0.09	0.75	1.14	0.56	1.14	10.6	2	9.8	1.98	2.66	0.6	33.47	0.00436	-0.00436
Non-DVT group	46	51	1.55	21.23	No	Yes	No	140	14	1.08	1.71	7.85	171	0.2	138	41.5	0.9	2.5	27.9	16.1	0.13	1.45	3.36	1.21	0.93	21.3	2	6.4	1.54	1.69	1.5	65.54	0.01442	-0.01442
Non-DVT group	48	57.1	1.66	20.72	No	No	No	108	13	1.66	1.48	8.01	463	0.45	103	34.4	0.88	0.97	25.8	15.7	0.15	1.44	3.74	1.2	0.97	16.4	4.75	4.8	2.1	3.68	0.69	51.63	0.03538	-0.03538
Non-DVT group	51	57	1.58	22.83	No	No	No	160	14	2.3	1.98	7.54	388	0.36	139	39.3	0.97	2.97	28.9	17.8	0.22	1.1	4.77	1.18	1.36	6.1	3.52	6.5	1.5	2.54	1.1	57.9	0.02216	-0.02216
Non-DVT group	26	98.8	1.63	37.19	No	No	No	140	14	2.43	1.16	4.5	358	0.35	138	41.4	0.94	1.24	31.6	16.6	0.21	0.86	4.65	0.88	1.2	9.4	6	5.6	1.43	1.48	0.87	23.65	0.0013	-0.0013
Non-DVT group	45	65	1.6	25.39	No	No	No	125	14	2.93	1.11	4.84	342	0.35	144	41.6	1	2.25	32.4	17.1	0.54	1.26	3.44	1.11	0.86	11.3	2	1.8	2.64	1.84	0.6	38.43	0.00584	-0.00584
Non-DVT group	57	50.7	1.54	21.38	No	No	No	129	14	2.78	1.32	4.93	372	0.36	131	39.6	0.88	1.4	29.2	18.1	0.3	1.31	3.1	1.1	0.82	21.3		22.9	1.52	1.09	0.57	19.98	0.02397	-0.02397
Non-DVT group	48	45	1.55	18.73	No	No	No	159	14	3.3	1.91	5.7	395	0.38	84	28.7	0.85	1.83	26.8	18.2	0.42	1.9	2.64	1.59	0.7	4.9	4.27	6.8	1.51	2.54	0.51	47.69	0.02318	-0.02318
Non-DVT group	60	52	1.5	23.11	No	No	No	128	14	6.39	2.59	5.19	231	0.23	123	36	1.08	1.53	24.3	15.6	0.29	1.45	3.28	1.2	0.81	17.6	2.63	4.8	0.65	3.69	0.8	33.16	0.09033	-0.09033
Non-DVT group	45	48.2	1.6	18.83	Yes	No	No	150	14	3.84	1.52	5.21	263	0.28	119	35.2	0.93	1.61	28.6	16.7	0.09	1.23	2.83	1.11	0.76	15.62		8	1.81	1.76	1.1	37.6	0.04114	-0.04114
Non-DVT group	23	52	1.63	19.57	No	No	No	145	14	2.81	2.04	10.21	328	0.37	113	35.6	0.87	1.25	26.5	16.3	0.3	1.37	3.6	1.16	0.96	15.8	5.41	6.7	1.62	2.58	1.54	47.16	0.00478	-0.00478
Non-DVT group	47	50	1.55	20.81	No	No	No	115	14	2.77	1.56	4.93	163	0.19	131	39	0.85	0.56	29.2	16.7	0.11	2.32	1.85	1.59	0.54	12.63	22.78	15.64	3.2	2.54	0.98	45.62	0.00419	-0.00419
Non-DVT group	24	56.8	1.68	20.12	No	No	No	95	14	3.01	2.56	5.02	188	0.18	134	40.1	1.02	1.42	29.3	16.6	0.08	2.32	2.4	1.61	0.64	29.2	7.2	9.4	1.51	4.84	0.54	12.66	0.00042	-0.00042
Non-DVT group	35	47	1.55	19.56	No	No	No	82	14	3.83	2.26	3.59	290	0.29	124	37.8	0.9	1.13	28.5	16.4	0.21	1.85	3.42	1.35	0.87	9.4		5.7	0.92	2.19	0.57	23.62	0.00165	-0.00165
Non-DVT group	47	60	1.63	22.58	No	No	No	85	14	3.06	2.38	4.4	260	0.26	128	39.8	0.82	1.02	25.5	17.8	0.13	1.37	3.02	1.33	0.89	5.6	5.01	7.6	1.51	5.65	0.68	47.69	0.01021	-0.01021
Non-DVT group	68	57	1.65	20.94	Yes	Yes	No	198	15	2.18	1.39	5.95	208	0.21	119	35.8	0.8	1.33	25	17.5	0.35	1.47	5.45	1.25	1.31	70.9	141	32.64	1.68	4.51	1.1	33.16	0.6804	-0.6804
Non-DVT group	42	55.3	1.5	24.58	No	No	No	35	14	8.21	1.71	5.97	213	0.24	129	39.3	0.97	0.95	27.3	17.1	0.27	1.13	4.82	0.97	1.19	12.7	2.53	5.2	4.8	2.65	1.21	37.6	0.00352	-0.00352
Non-DVT group	52	60	1.6	23.44	No	No	No	220	14	1.65	1.67	6.5	341	0.38	82	30.4	0.81	1.09	25	16	0.12	1.86	3.41	1.34	0.9	4.9	7.68	4.3	1.61	1.38	0.6	47.16	0.11909	-0.11909
Non-DVT group	36	52.9	1.6	20.66	No	No	No	88	14	2.46	2.14	6.22	310	0.28	121	36.7	0.89	0.67	31.1	16.7	0.09	1.59	3.54	1.22	0.85	2.9	5	1.8	6.4	4.87	1.25	26.65	0.00101	-0.00101
Non-DVT group	35	62	1.58	24.84	No	No	No	79	14	4.48	2.09	6.41	252	0.28	117	36.5	0.84	0.83	26.4	18.2	0.35	1.51	3.08	1.29	0.76	17.2	3.95	11.9	1.26	2.53	0.35	38.38	0.00373	-0.00373
Non-DVT group	33	59	1.53	25.2	No	No	No	123	14	2.86	1.84	7.67	252	0.24	135	38.8	0.9	0.87	27.7	16.3	0.1	1.71	3.22	1.38	0.79	48.62	32.61	6.4	2.5	3.96	0.84	15.62	0.00199	-0.00199
Non-DVT group	44	67.5	1.6	26.37	No	No	No	193	15	1.7	1.82	6.98	390	0.4	103	33.7	0.93	1.36	21.4	16.3	0.53	1.13	3.3	0.98	0.98	13.8	6.93	6.7	1.5	4.51	1.52	25.65	0.24575	-0.24575
Non-DVT group	60	59	1.57	23.94	No	No	No	168	14	3.88	3.03	3.63	199	0.22	139	41	0.9	0.66	28.2	15.7	0.14	0.83	2.43	0.92	0.78	84.9	7.89	8.1	0.64	4.54	1.69	34.69	0.07232	-0.07232
Non-DVT group	42	52.4	1.49	23.6	No	No	No	274	14	2.16	2.43	5.51	229	0.25	122	35.9	0.89	0.94	25	15.1	0.07	1.16	2.85	1.14	0.81	17.92	18.65	26.6	2.13	1.56	1	63.99	0.10874	-0.10874
Non-DVT group	45	52.8	1.47	24.43	No	No	No	90	14	3.78	1.99	3.45	388	0.41	114	36.4	1.05	1.83	27.9	17.3	0.12	1.53	3.2	1.36	0.96	7.4	3.52	7.6	3.5	2.51	0.95	25.63	0.00301	-0.00301
Non-DVT group	45	52.2	1.59	20.65	No	No	No	105	15	5.43	1.55	6.43	217	0.22	112	34	0.89	1.5	29.3	16	0.09	1.31	2.67	1.06	0.67	7.1	6	6.4	1.5	4.81	0.51	37.66	0.00355	-0.00355
Non-DVT group	33	53.9	1.56	22.15	No	No	No	74	14	2.01	1.47	6.77	270	0.29	126	37.6	0.92	1.21	24.7	14.9	0.33	1.61	4.32	1.14	1	306.4	2	5	0.64	1.74	1.7	66.7	0.00946	-0.00946
Non-DVT group	44	64.3	1.62	24.5	No	No	No	178	15	5.05	1.63	6.08	243	0.29	90	29.6	1.02	0.69	21.8	16.6	0.18	1.15	3.4	1.03	0.89	15.6	2	20.5	5.91	1.67	1.3	59.22	0.08893	-0.08893
Non-DVT group	37	64.6	1.65	23.73	No	No	No	132	14	2.76	1.64	8.98	162	0.19	102	33.4	0.92	0.79	29.5	15.6	0.13	1.54	2.44	1.08	0.63	5.2	4.75	6.2	0.84	2.51	0.57	15.62	0.0044	-0.0044
Non-DVT group	74	57.8	1.59	22.86	No	No	No	97	14	3.83	1.27	6.61	356	0.34	107	34.9	0.88	1.19	27.7	14.3	0.27	1.09	4.31	1.08	1.1	15.6	13.59	11.5	1.51	1.6	0.8	24.15	0.08794	-0.08794
Non-DVT group	62	58.6	1.65	21.52	No	No	No	73	14	3.98	1.8	5.71	238	0.28	135	40.7	0.9	0.77	26.7	17.1	0.26	1.44	2.37	1.17	0.68	18.1	95.29	9.1	1.6	2.38	0.86	43.34	0.03838	-0.03838
Non-DVT group	39	56	1.67	20.08	No	No	No	96	14	2.68	1.43	7.63	245	0.26	134	40.4	0.87	2.61	26.6	16.3	0.2	1.27	2.96	1.07	0.75	8.7	17.94	9.1	0.57	1.93	0.57	36.55	0.00858	-0.00858
Non-DVT group	39	50	1.63	18.82	No	No	No	190	14	3.24	1.94	5.15	355	0.36	75	26.2	0.86	1.63	26.8	18.3	0.31	1.36	3.26	1.07	0.78	9.6	4.9	6.8	0.89	1.91	0.92	52.52	0.03897	-0.03897
Non-DVT group	58	64.5	1.6	25.2	No	No	No	68	14	3.64	1.39	4.06	186	0.2	128	41.4	0.95	0.7	28.5	16.9	0.43	1.78	5.88	1.42	1.32	32.7	8.3	6.9	0.62	2.51	0.84	15.62	0.01063	-0.01063
Non-DVT group	39	66.5	1.57	26.98	No	No	No	157	14	3.28	1.56	5.47	251	0.24	127	39.2	0.9	0.6	25.8	16.6	0.33	1.59	4.05	1.34	1	6.85	9.6	7.1	1.51	3.65	1.52	47.69	0.01662	-0.01662
Non-DVT group	58	55.5	1.53	23.71	No	No	No	205	14	2.71	1.61	7.61	283	0.29	138	42.9	0.92	0.88	28.6	17.7	0.19	1.62	4.91	1.4	1.21	11.1	11.97	4.9	0.62	1.58	1.02	33.16	0.04588	-0.04588
Non-DVT group	52	68	1.58	27.24	No	No	No	168	12	6.32	2.06	3.77	217	0.22	105	34.5	0.89	0.8	28.3	16.8	0.48	1.42	2.69	1.2	0.7	25.9	7.98	16.4	1.31	2.16	9.7	37.6	0.11047	-0.11047
Non-DVT group	48	64	1.63	24.09	No	No	No	134	14	3.49	1.11	4.48	274	0.31	140	42.8	0.94	1.63	28.3	16.8	0.25	1.85	5.18	1.51	1.22	9.1	4.6	7.2	0.83	1.39	2.54	8.5	0.00805	-0.00805
Non-DVT group	51	64	1.6	25	No	No	No	86	13	2.68	2.09	3.88	240	0.28	130	40.6	0.87	2.45	24.9	17.6	0.18	1.5	4.72	1.2	1.2	16.4	23.39	6	5.8	1.5	1.5
Non-DVT group	41	46	1.55	19.15	No	No	No	126	14	2.08	1.02	8.02	369	0.39	114	35.7	0.99	1.87	26.1	16.3	0.19	1.64	3.34	1.27	0.82	11.7	30.65	8	1	2.02	0.64	15.62	0.00981	-0.00981
Non-DVT group	42	50	1.57	20.28	No	No	No	185	13	2.65	1.96	4.87	188	0.18	130	37.8	0.85	0.86	22.5	15.9	0.81	1.58	2.42	1.31	0.67	11.6	2.94	4.8	1.72	1.31	0.57	18.52	0.21707	-0.21707
Non-DVT group	42	78.5	1.65	28.83	No	No	No	117	13	2.63	1.51	6.78	290	0.26	116	35	0.91	1.33	26.3	17.5	0.25	1.42	2.31	1.3	0.64	12.1	6.4	10.8	2.13	1.81	0.58	47.69	0.02991	-0.02991
Non-DVT group	44	58	1.55	24.14	No	No	No	100	14	3.38	2.35	3.96	212	0.22	118	37.2	0.91	2.34	26.4	16.3	0.12	0.92	3.06	1.15	0.92	24.4	82.89	10	1.74	3.52	0.8	33.16	0.00716	-0.00716
Non-DVT group	30	56	1.63	21.08	No	No	No	81	14	3.22	1.8	5.61	268	0.29	132	39.4	0.9	1.03	29.6	17	0.1	1.08	3	0.98	0.75	15.62	10.38	7.6	1.57	1.51	0.91	37.6	0.00129	-0.00129
Non-DVT group	40	60	1.6	23.44	No	No	No	81	14	3.39	1.84	4.35	314	0.32	129	38.9	0.9	0.78	28.6	17	0.17	1.57	4.32	1.19	1	13.3		9.3	0.98	2.58	0.84	47.16	0.00337	-0.00337
Non-DVT group	29	55	1.67	19.72	No	No	No	80	14	3.09	2.06	4.58	257	0.29	115	37.1	0.94	1.1	29.1	17.7	0.14	1.94	2.53	1.44	0.66	6.4		6.1	1.59	2.01	0.51	48.62	0.0009	-0.0009
Non-DVT group	47	54	1.57	21.91	No	No	No	255	14	5.2	1.56	5.59	250	0.25	135	39.7	0.88	0.7	27.9	16.4	0.1	1.36	2.85	1.12	0.73	31.1	3.89	4.8	3.5	3.69	0.67	25.22	0.06591	-0.06591
Non-DVT group	32	61.1	1.59	24.17	No	No	No	72	15	3	1.43	4.29	291	0.29	102	32	0.99	0.97	26.8	16.4	0.26	1.64	2.71	1.18	0.7	20.3	66.53	7.7	0.89	3.73	0.94	6.9	0.00624	-0.00624
Non-DVT group	41	58	1.64	21.56	No	No	No	100	14	2.86	1.64	4.06	210	0.22	140	42.8	1.08	0.86	23.7	17.7	0.13	1.01	2.99	1.11	1	15.6	12.15	4.1	0.98	2.58	0.6	7.9	0.0137	-0.0137
Non-DVT group	27	60	1.6	23.44	No	No	No	65	14	5.44	2.13	6.58	253	0.25	121	36.8	0.91	1.12	26.8	16.2	0.42	1.02	2.6	1.24	0.7	7.3	4.07	5.2	1.5	2.51	0.92	19.12	0.00132	-0.00132
Non-DVT group	44	59	1.64	21.94	No	No	No	161	13	5.05	1.36	5.42	274	0.26	130	39.2	0.9		28.9	16.8	0.27	1.15	3.72	1.04	1	14.62	14.69	11.6	2.03	3.05	0.36	25.99	0.0282	-0.0282
Non-DVT group	30	51	1.62	19.43	No	No	No	138	14	2.23	2.18	5.22	305	0.28	124	37.5	0.93	0.9	28	17.5	0.66	2.09	3.78	1.39	0.91	12.6	9.63	14.4	1.56	2.71	1.92	9.5	0.00587	-0.00587
Non-DVT group	23	47	1.63	17.69	No	No	No	72	14	3.98	1.95	3.18	306	0.31	130	39.1	0.86	1.32	30.4	17.3	0.05	1.46	3.02	1.21	0.77		2	14.4	2.32	5.87	0.8
Non-DVT group	39	68	1.74	22.46	No	No	No	179	14	2.89	3.42	5.99	254	0.26	134	39.8	0.92	3.04	27.7	18.2	0.13	1.41	3.12	1.19	0.85	107.9	6.44	6.5	2.5	2.96	7.9	29.38	0.01736	-0.01736
Non-DVT group	47	64	1.58	25.64	No	No	No	130	14	2.69	1.82	4.88	319	0.32	144	42.8	0.89	1.3	27.4	17.6	0.28	0.78	2.05	0.94	0.65	12.7	2.03	8.5	1.65	1.15	0.54	26.55	0.01978	-0.01978
Non-DVT group	29	39.5	1.5	17.56	No	No	No	75	14	2.63	1.44	3.89	212	0.23	142	42.7	0.95	1.17	26.1	16.7	0.1	1.94	3.13	1.34	0.81	6.7	10.14	4.7	1.35	1.81	0.9	16.44	0.00143	-0.00143
Non-DVT group	33	45	1.6	17.58	No	No	No	94	14	4.65	1.66	5.41	354	0.36	138	38.7	1.14	1.26	30.4	17.2	0.45	1.66	3.16	1.22	0.78		20.54	7.8	1.98	2.58	1	28.66
Non-DVT group	31	48	1.58	19.23	No	No	No	43	14	2.89	1.94	9.6	304	0.31	138	41.8	0.93	1.02	29.1	18.5	0.2	1.43	3	1.08	0.76	8.8	9.92	9.5	0.68	3.64	1	51.11	0.00105	-0.00105
Non-DVT group	50	59	1.64	21.94	No	No	No	79	15	3.32	1.47	4.67	279	0.3	138	43.1	0.99	2.51	26.5	16.2	0.38	1.4	2.1	1.24	0.59	17.6	1	6.2	2.4	2.51	0.5	40.27	0.01635	-0.01635
Non-DVT group	44	65	1.65	23.88	No	No	No	185	14	3.09	1.69	4.15	248	0.27	121	36.7	0.91	1.52	25	17.3	0.24	1.17	1.96	0.99	0.55	125.1		4.1	1.74	2.68	0.84	4.9	0.06767	-0.06767
Non-DVT group	49	56.9	1.59	22.51	No	No	No	222	14	2.67	1.43	4.75	280	0.31	92	32.2	0.94	1.33	22.3	17.5	0.17	1.19	3.87	1.01	1.09	15.7	5.32	7	1.05	2.79	0.8	53.67	0.28018	-0.28018
Non-DVT group	49	52.3	1.56	21.49	No	No	No	88	14	5.17	2.12	4.36	402	0.41	126	39.6	0.98	0.96	27.1	16.4	0.27	1.24	3.54	1.03	0.88	59.4	1	10.8	0.71	1.9	0.92	28.64	0.01481	-0.01481
Non-DVT group	23	48.5	1.63	18.25	No	No	No	47	14	2.26	1.99	5.92	250	0.27	130	38.9	0.96	0.92	30.2	17.5	0.12	1.54	3.28	1.1	0.81	3.4	6.95	4.7	0.94	1.55	0.87	61.05	0.00043	-0.00043
Non-DVT group	26	51.9	1.63	19.53	No	No	No	73	15	8.17	1.51	8.6	262	0.25	138	42.7	0.95	2.28	31.2	17.8	0.1	1.77	3.42	1.26	0.84	13.2	49.83	14.2	1.8	2.3	1.12	185.9	0.00103	-0.00103
Non-DVT group	53	62.7	1.63	23.6	No	No	No	163	14	1.94	1.73	5.9	229	0.24	128	39.6	0.9	1.02	26.3	17.3	0.28	1.38	5.48	1.1	1.34	19.3	23.76	15.3	0.62	2.28	0.5	58.64	0.08438	-0.08438
Non-DVT group	22	45.1	1.55	18.77	No	No	No	110	14	1.92	3.34	4.85	222	0.24	138	41.2	0.96	0.64	28.6	17.4	0.06	1.59	2.37	1.2	0.62	28.4		6.5	5.5	2.84	1	42.69	0.00091	-0.00091
Non-DVT group	30	51.5	1.53	22	No	No	No	70	14	3.72	2.26	6.99	294	0.29	136	41.3	0.9	1.24	25.8	18	0.05	1.19	2.57	0.92	0.71	11	13.97	8.3	0.96	0.95	0.8	17.58	0.0025	-0.0025
Non-DVT group	33	45	1.6	17.58	No	No	No	90	14	4.33	0.95	5.44	203	0.24	139	42.7	0.83	1.33	30.8	16.9	0.3	2.08	2.79	1.4	0.74	7.2		6.8	1.62	1.85	1.54	25.65	0.00106	-0.00106
Non-DVT group	31	52	1.63	19.57	No	No	No	110	14	2.54	1.86	6.63	158	0.16	120	37.2	0.86	0.99	29.6	17.3	0.09	1.54	2.27	1.2	0.62	7.6	3.79	11.9	1.91	2.05	1.31	32.7	0.00155	-0.00155
Non-DVT group	58	70	1.6	27.34	No	No	No	128	14	2.64	2.15	4.15	283	0.26	145	41.8	1	0.54	27	16.4	0.15	1.23	5.35	1.12	1.39	16.3		6.9	1.51	2.84	0.87	15.62	0.03391	-0.03391
Non-DVT group	32	53	1.56	21.78	No	No	No	90	14	4.68	1.16	5.06	152	0.17	132	39.6	0.8	1.66	26.2	18.7	0.29	1.33	2.67	1.08	0.67	12.6	1	12.5	3.55	1.4	0.54	9.4	0.00392	-0.00392
Non-DVT group	65	48.3	1.48	22.05	No	No	No	205	14	1.95	2.4	5.85	300	0.28	129	38.6	0.84	1.02	28.3	17.6	0.11	0.98	1.39	1.05	0.51	28.2		6.7	2.54	2.95	3.1	44.77	0.11995	-0.11995
Non-DVT group	28	50	1.68	17.72	No	No	No	100	15	3.18	1.93	8.08	189	0.18	143	43.3	0.85	0.78	31.3	18.9	2	1.88	3.58	1.31	0.89	9.6	7.4	7.2	0.85	2.22	0.84	293.65	0.07004	-0.07004
Non-DVT group	52	73	1.6	28.52	No	No	No	210	15	2.38	2.1	5.41	276	0.29	107	35.7	0.89	2.21	28.4	16.3	0.17	1.08	4.27	0.94	1.14	11.6	1	4.2	1.88	2.39	0.58	56.62	0.04845	-0.04845
Non-DVT group	38	73.5	1.56	30.2	No	No	No	123	12	3.12	2.06	5.27	276	0.28	141	42.6	0.84	1.07	28.9	16.5	0.12	0.92	3.52	0.86	0.9	194.6	17.55	7.8	0.92	1.28	0.57	26.1	0.01516	-0.01516
Non-DVT group	42	54	1.65	19.83	No	No	No	124	12	2.8	1.88	6.43	289	0.28	131	39.7	0.86	0.84	26.5	19	0.21	2	3.03	1.47	0.8	15.62	7.66	18.7	0.64	2.23	0.4	97.75	0.03841	-0.03841
Non-DVT group	48	60	1.58	24.03	No	No	No	125	13	2.65	2.59	6.01	237	0.26	126	38.2	0.93	0.71	27.3	16.7	0.19	1.35	3.65	1.16	0.97	6.4	3.86	6.8	0.94	0.92	0.8	76.74	0.03266	-0.03266
Non-DVT group	40	54	1.63	20.32	No	No	No	255	14	1.97	2.22	5.73	302	0.3	129	38.8	0.92	1.66	26.5	18.4	0.19	1.41	4.89	1.12	1.13	8.5	4.53	6.6	1.51	1.95	1.9	53.95	0.08343	-0.08343
Non-DVT group	27	61.6	1.58	24.68	No	No	No	91	14	3.38	2.11	8.62	280	0.27	144	43.8	0.94	0.85	35	19.4	0.2	1.45	4.58	1.11	1.1	12.36	11.58	6.2	1.75	1.46	0.6	16.54	0.00021	-0.00021
Non-DVT group	47	57.8	1.55	24.06	No	No	No	206	14	2.67	2.97	7.15	382	0.43	99	33	1.05	1.54	24.7	16.2	0.31	1.16	3.41	0.99	0.91	13.4	10.62	9.8	0.92	2.51	2.54	6.4	0.10485	-0.10485
Non-DVT group	39	50	1.6	19.53	No	No	No	101	14	6.06	1.74	4.88	262	0.31	111	35.6	0.9	1.45	27.2	16.7	0.17	1.66	4.2	1.13	0.98	9.5	6.4	9.4	1.38	3.26	1	572.49	0.18064	-0.18064
Non-DVT group	22	54	1.6	21.09	No	No	No	43	14	2.63	1.92	3.76	270	0.25	130	37.2	0.98	0.59	29.2	18.8	0.35	1.02	3.1	0.92	0.82	7.5	5.4	8.7	0.93	2.84	1.9	37.81	0.00067	-0.00067
Non-DVT group	41	51	1.55	21.23	No	No	No	125	15	1.96	1.57	4.24	370	0.36	114	36.6	0.94	0.89	31.5	16.1	0.2	1.15	3.86	1.01	1	52.6	85.32	12.2	1.57	1.69	0.3	29.46	0.00208	-0.00208
Non-DVT group	28	52	1.63	19.57	No	No	No	60	12	3.05	1.52	7.19	359	0.33	135	39.7	0.95	1.27	29.2	17.4	0.1	1.87	4.43	1.54	1.08	12.4	10.66	9.8	0.65	3.62	0.41	26.54	0.001	-0.001
Non-DVT group	30	63	1.63	23.71	No	No	No	135	15	5.42	2.01		184	0.2	132	39.7	0.89	2.33	28.2	17.2	0.12	1.37	3.45	1.19	0.9	9.9	6.1	5.1	0.94	1.58	0.7	19.64	0.00264	-0.00264
Non-DVT group	45	56	1.57	22.72	No	No	No	93	14	4.84	2.39	10.79	315	0.31	138	41.4	1.09	1.01	29.5	16.3	0.23	1.05	2.71	0.97	0.78	10.1	6.58	9.6	0.95	1.36	0.59	36.45	0.00594	-0.00594
Non-DVT group	52	60	1.58	24.03	No	No	No	120	13	3.68	1.07	4.94	466	0.51	85	28.6	0.97	1.32	24.6	15.6	2.36	1.99	4	1.41	1	11.8		6	1.08	2.41	0.8	47.69	0.65641	-0.65641
Non-DVT group	41	58	1.67	20.8	No	No	No	125	14	4.3	1.81	7.07	200	0.24	88	30.5	1.01	1.42	27.7	17.4	0.17	1.65	2.53	1.24	0.6	23.5	10.71	7.5	2.47	1.29	0.84	33.16	0.00869	-0.00869
Non-DVT group	32	51	1.57	20.69	No	No	No	104	14	2.48	1.19	6.53	295	0.3	150	44.9	0.88	1.8	29.5	17.4	0.15	1.91	3.39	1.49	0.82	9.7		6.9	0.74	2.54	0.8	37.6	0.00103	-0.00103
Non-DVT group	28	56	1.57	22.72	No	No	No	38	13	4.6	1.49	4.42	313	0.3	130	39.2	0.89	1.86	31.4	17.5	0.2	1.79	3.17	1.27	0.8	12.2	47.92	4.9	1.51	1.58	1.4	47.16	0.00079	-0.00079
Non-DVT group	38	73	1.65	26.81	No	No	No	120	15	1.63	2.21	6.29	321	0.32	148	42.9	0.92	1.65	28.7	17.2	0.13	0.93	3.69	0.97	1	56.32	155	33.67	2.61	2.69	2.51	36.54	0.00344	-0.00344
Non-DVT group	49	57	1.53	24.35	No	No	No	56	14	2.85	1.82	4.06	232	0.25	145	43	0.96	1.1	29.6	17.4	0.12	1.44	5.14	1.28	1.4	3.7	13.19	19.64	2.64	3.65	0.68	26.54	0.00208	-0.00208
Non-DVT group	57	65	1.66	23.59	No	No	No	147	14	1.94	2.09	5.93	223	0.23	140	41.9	1.05	1.11	25	17.2	0.1	1.47	4.08	1.19	1	8.1	32.61	16.4	0.99	3.74	1.3	45.7	0.08365	-0.08365
Non-DVT group	45	51	1.58	20.43	No	No	No	105	14	2.66	1.95	5.11	167	0.16	114	33	0.95	0.71	30.2	17	0.05	1.32	1.79	1.12	0.51	425.2	2.62	10.4	5.7	3.55	0.4	26.54	0.00466	-0.00466
Non-DVT group	34	53.2	1.63	20.02	No	No	No	120	14	1.76	1.78	4.71	182	0.19	121	36.8	0.88	0.78	31.7	17.2	0.2	1.48	1.8	1.09	0.49	19.4	5.74	18.1	0.76	5.12	1.5	37.31	0.00196	-0.00196
Non-DVT group	40	46.9	1.55	19.52	No	No	No	150	14	4.44	3	6.11	263	0.29	129	38.2	1	1.4	30.1	16.5	0.15	1.63	3.68	1.29	0.96	4.9	67.53	9.2	2.03	1.05	0.94	16.84	0.00381	-0.00381
Non-DVT group	30	65	1.62	24.77	No	No	No	143	14	2.4	2.16	5.99	255	0.28	137	39.6	0.96	1.94	29.2	16.6	0.18	1.44	3.19	1.1	0.8	27.4	15.69	9.5	1.51	2.54	0.87	46.84	0.0036	-0.0036
Non-DVT group	29	52.5	1.52	22.72	No	No	No	150	14	2.04	2.39	8.85	220	0.24	119	37.6	0.89	0.72	32.3	16.6	0.42	1.31	3.95	1.04	0.97	35.7	4.55	9.2	0.99	1.96	0.7	44.24	0.00209	-0.00209
Non-DVT group	38	55	1.67	19.72	No	No	No	86	15	3.64	1.61	6.2	193	0.2	139	41.7	0.96	1.02	27.7	16.5	0.06	1.82	1.25	1.35	0.4	11.2	2.04	9	1.32	3.37	0.68	36.51	0.00285	-0.00285
Non-DVT group	35	45.3	1.55	18.86	No	No	No	179	14	2.4	1.86	7.29	290	0.32	74	27.1	0.91	1.63	25	16.8	0.19	1.16	2.33	0.92	0.6	8.8	1	6.4	0.69	2.84	0.79	18.84	0.02933	-0.02933
Non-DVT group	64	63.6	1.59	25.16	No	No	No	140	14	2.91	2.59	6.14	221	0.23	132	39.6	0.98	0.74	26.3	17.3	0.16	1.24	4.8	1.13	1.13	132.5	2.53	4.9	1.59	1.6	1.2	45.59	0.09902	-0.09902
Non-DVT group	38	50.5	1.66	18.33	No	No	No	75	14	5.02	2.37	7.34	259	0.24	145	44.1	0.89	2.19	30.1	16.6	0.13	2.03	2.19	1.46	0.6	120.6	5.64	5.2	2.51	2.51	4.4	26.99	0.00123	-0.00123
Non-DVT group	30	55	1.55	22.89	No	No	No	50	14	2.86	1.31	7.59	236	0.27	123	39.4	0.86	3.22	34.2	17.4	0.07	1.49	1.88	1.24	0.5	17.7	2.4	8.4	5.48	2.41	0.5	36.43	0.00013	-0.00013
Non-DVT group	64	45.5	1.58	18.23	No	No	No	108	14	1.47	2.32	3.72	293	0.29	129	39.5	0.88	3.39	28.1	18.1	0.29	1.43	3.88	1.1	1.06	32.6	7.45	10.7	1.86	3.89	0.87	16.62	0.0479	-0.0479
Non-DVT group	44	60.7	1.58	24.32	No	No	No	151	15	3.53	1.62	5.74	190	0.22	128	37.4	1.12	0.75	23.8	16.4	0.38	0.95	3.8	1.2	1.03	7.5	2.51	15.1	1.11	2.44	0.6	25.48	0.04006	-0.04006
Non-DVT group	37	48.7	1.58	19.51	No	No	No	150	14	1.08	1.52	6.16	340	0.34	97	31.8	0.89	1.79	25.6	17.3	0.28	1.39	2.76	1.08	0.69	7.3	1.62	9.5	1.1	5.11	0.7	9.9	0.01747	-0.01747
Non-DVT group	37	45	1.52	19.48	No	No	No	145	14	1.66	1.53	5.01	387	0.37	132	39.8	0.82	1.77	29.2	17.1	0.35	1.63	2.21	1.23	0.6	213.6	9.4	6.2	1.58	3.64	0.81	9.4	0.0058	-0.0058
Non-DVT group	58	63	1.45	29.96	No	No	No	135	14	2.3	1.55	7.98	299	0.28	119	35.7	0.91	1.57	23.6	17.4	0.73	1.16	3.83	1.17	1.03	27.8	25.14	12.7	1.3	1.86	1.5	18.54	0.13359	-0.13359
Non-DVT group	48	61	1.55	25.39	No	No	No	215	14	2.43	1.39	4.88	365	0.36	108	34.2	0.83	2.04	23.2	16.3	0.24	1.41	2.23	1.1	0.64	8.8	205.65	26.64	0.69	2.51	1.6	26.1	0.16005	-0.16005
Non-DVT group	60	62.2	1.56	25.56	No	No	No	73	15	2.93	1.75	5.85	180	0.24	121	36.1	0.94	0.99	28.6	15.9	0.37	1.5	2.91	1.24	0.76	13.6	9.25	8.5	1.98	1.92	0.97	19.64	0.01437	-0.01437
Non-DVT group	37	64	1.6	25	No	No	No	45	14	2.78	1.73	5.8	226	0.23	133	39.9	0.9	3.41	27.3	17.3	0.3	1.12	2.95	0.98	0.73	6.8	7.45	9.4	0.64	3.69	0.7	64.88	0.00391	-0.00391
Non-DVT group	58	67.8	1.6	26.48	Yes	No	No	221	14	3.3	2.58	6.97	212	0.22	140	42.8	0.98	0.94	27.3	17.3	0.31	1.46	3.08	1.21	0.83	16.7	4.45	7.8	1.18	3.7	0.9	31.69	0.35764	-0.35764
Non-DVT group	29	54.6	1.62	20.8	No	No	No	29	14	6.39	1.07	5.91	293	0.32	137	39.5	0.87	1.33	28.2	17.3	0.14	0.99	2.45	1.11	0.77	13.2	6.4	15.6	0.93	4.96	0.8	30.83	0.00061	-0.00061
Non-DVT group	50	58.5	1.58	23.43	No	No	No	125	15	3.84	1.05	4.81	323	0.34	118	38.1	0.81	2.42	23.2	15.8	0.48	2.13	2.36	1.57	0.66	17.1	4.9	6	0.89	1.47	0.9	69.24	0.03875	-0.03875
Non-DVT group	29	55	1.55	22.89	No	No	No	144	14	2.81	1.01	4.6	323	0.36	143	44.4	0.87	0.79	27.4	18.2	0.13	0.96	8.86	0.74	1.9	8.8	2.21	5.8	0.84	2.57	1	38.85	0.00745	-0.00745
Non-DVT group	39	83.5	1.63	31.43	No	No	No	138	13	2.77	1.99	3.07	198	0.29	110	34.6	0.89	2.04	25.5	16.1	0.11	1.03	3.34	1.06	1.01	13	6.4	11.8	0.74	2.86	1.1	24.08	0.02146	-0.02146
Non-DVT group	29	43.3	1.68	15.34	No	No	No	106	15	3.01	1.41	4.33	211	0.23	138	40.5	0.81	1.1	28.6	16.4	0.1	1.66	2.93	1.33	0.81	50.2	12.93	16.1	0.54	0.9	0.87	32.65	0.00151	-0.00151
Non-DVT group	20	56	1.75	18.29	No	No	No	85	14	3.83	1.67	5.86	234	0.24	121	34.7	0.8	0.44	30.4	17.6	0.23	1.67	2.54	1.23	0.74	27.8	24.63	5.1	2.14	2.39	0.92	31.84	0.00053	-0.00053
Non-DVT group	67	74.3	1.6	29.02	Yes	Yes	No	81	14	3.06	1.78	5.03	205	0.22	126	36.3	0.88	1.57	24.7	17.3	0.33	0.92	2.89	0.93	0.92	11.2	14.12	6.8	0.68	2.58	2.6	21.55	0.31151	-0.31151
Non-DVT group	30	52	1.65	19.1	No	No	No	83	14	2.18	1.25	4.2	212	0.21	128	39.6	0.92	2.32	25.3	16.9	0.09	1.43	4.25	1.2	1.1	24	15.62	5.9	1.15	1.57	1.4	39.33	0.0033	-0.0033
Non-DVT group	43	59.6	1.57	24.18	No	No	No	197	14	8.21	2.31	5.08	275	0.29	130	38.6	0.92	0.66	22.6	18	0.2	1.55	4.18	1.31	1.13	35.7	4.64	6.9	1.16	1.29	1.4	24.86	0.07259	-0.07259
Non-DVT group	63	60	1.62	22.86	No	No	No	156	14	1.65	2.15	4.05	172	0.17	139	41.4	0.87	1.02	27	17	0.24	1.34	4.03	1.28	1.2	23.7	11.65	6.4	0.68	1.69	1.62	29.54	0.07612	-0.07612
Non-DVT group	47	58.1	1.58	23.27	No	No	No	95	15	2.46	1.94	4.56	220	0.24	125	36	1.02	3.79	23.7	16.5	0.27	1.61	2.74	1.33	0.77	18.6	1	7.6	1.43	2.38	0.57	61.49	0.02619	-0.02619
Non-DVT group	36	66.9	1.55	27.85	No	No	No	65	14	4.48	1.7	6.23	282	0.29	126	38.8	0.85	2.34	26.5	17.2	0.59	1.28	2.7	1.12	0.83	26.64	10.33	4.9	0.62	3.65	0.3	69.59	0.00681	-0.00681
Non-DVT group	30	66	1.65	24.24	No	No	No	62	13	2.86	1.43	6.82	307	0.3	140	39.4	0.79	1.29	26.3	17.4	0.14	1.27	2.13	1.22	0.74	25.61	1.64	6.2	0.35	2.54	0.81	45.62	0.0011	-0.0011
Non-DVT group	32	50	1.56	20.55	No	No	No	100	14	1.7	1.64	5.79	306	0.29	141	41.4	0.94	1.37	27.6	16.8	0.46	1.63	3.48	1.31	0.9	4.9	23.75	11.9	1.51	2.84	0.8	39.94	0.00348	-0.00348
Non-DVT group	32	56.7	1.58	22.71	No	No	No	155	12	3.88	2.03	7.39	338	0.34	113	34.3	0.86	0.97	26.4	16.9	0.44	1.16	3.42	1	0.93	9.4	4.3	9.3	1.76	2.77	0.7	21.16	0.03815	-0.03815
Non-DVT group	31	55.4	1.56	22.76	No	No	No	70	13	2.16	2.16	4.61	268	0.27	149	44.8	0.82	0.74	29	18.1	0.11	1.39	4.29	1.14	1.1	38.4		18.6	1.24	4.12	0.68	23.72	0.00155	-0.00155
Non-DVT group	27	65	1.68	23.03	No	No	No	104	14	3.78	2.47	4.85	253	0.27	139	43.4	0.94	0.73	25.7	17	0.11	1.56	3.82	1.34	1.1	32.1		7.1	1.05	1.17	0.57	39.84	0.00261	-0.00261
Non-DVT group	35	55.7	1.65	20.46	No	No	No	110	15	5.43	2.13	6.11	239	0.24	129	38.2	0.83	3.39	29.1	17.2	0.28	1.38	2.29	1.14	0.72	24.1	31.03	14.9	0.88	2.87	0.51	30.79	0.00221	-0.00221
Non-DVT group	53	66	1.65	24.24	No	No	No	177	13	2.01	2.75	6.37	218	0.22	111	36.5	0.95	0.8	26.4	17.6	0.18	1.49	2.19	1.19	0.63	5.2		6.4	1.62	2.58	0.69	34.68	0.16269	-0.16269
Non-DVT group	24	62.5	1.68	22.14	No	No	No	160	14	5.05	2.22	4.33	258	0.26	145	41.1	0.91	1.25	32.1	18.4	0.14	1.58	1.45	1.22	0.42	11.8	9.92	3.9	0.92	4.8	0.97	26.54	0.00097	-0.00097
Non-DVT group	54	55	1.54	23.19	No	No	No	150	14	2.76	1.35	3.93	255	0.28	135	40.9	0.9	0.76	29.7	17.5	0.3	1.39	4.34	1.26	1.21	15.62	19.58	7.5	1.32	1.67	3.6	23.72	0.01616	-0.01616
Non-DVT group	24	48.3	1.52	20.91	No	No	No	45	15	3.83	1.83	7.72	252	0.24	121	35.9	1.05	1.36	28.3	17.7	0.22	1.46	2.52	1.23	0.7	10.8	3.45	4.9	0.84	2.54	2.51	36.7	0.00046	-0.00046
Non-DVT group	58	64.9	1.62	24.73	Yes	Yes	No	125	14	3.98	2.6	3.91	206	0.26	128	38.5	0.8	1.02	23.3	17.3	0.76	1.18	1.46	1.13	0.56	24.62	29.63	11.8	0.79	2.34	1.51	30.79	0.5	-0.5
Non-DVT group	46	58.5	1.58	23.43	No	No	No	80	14	2.68	2.11	5.2	444	0.42	101	32.8	0.87	0.75	27	17.3	0.36	1.6	3.03	1.22	0.86	15.6	4.03	7.5	0.94	2.65	0.94	26.98	0.00925	-0.00925
Non-DVT group	38	42.5	1.5	18.89	No	No	No	93	14	3.24	1.63	6.37	261	0.28	132	39.3	0.92	3.82	26.5	17.7	0.18	1.53	3.25	1.29	0.92	22.7	12.95	4.9	0.25	2.41	1.6	31.73	0.00405	-0.00405
Non-DVT group	44	69	1.66	25.04	No	No	No	150	14	3.64	1.68	8.13	246	0.28	113	34.4	1.02	1.65	26.2	16.8	0.24	1.58	2.97	1.28	0.83	26.6	5.05	5.8	1.51	3.51	0.69	25.84	0.02164	-0.02164
Non-DVT group	37	47.5	1.52	20.56	No	No	No	147	15	3.28	2.19	5.89	239	0.26	128	38.3	0.94	1.41	23.9	16.6	0.17	1.12	3.45	1.27	0.92	14.6	2.93	11.5	2.81	1.57	0.57	29.19	0.01373	-0.01373
Non-DVT group	33	48	1.53	20.5	No	No	No	110	14	2.71	1.28	5.07	311	0.3	142	41	0.91	0.76	24.6	17.6	0.08	1.6	2.72	1.36	0.79	12.63	6.13	4.9	1.58	4.57	0.52	31.92	0.00437	-0.00437
Non-DVT group	49	63	1.64	23.42	Yes	No	No	163	14	6.32	2.12	8.61	168	0.19	146	42.1	0.86	1.02	28.4	18	0.17	1.8	3.08	1.33	0.86	10.63	3.48	9.8	1.62	3.51	0.68	23.72	0.06047	-0.06047
Non-DVT group	46	63	1.66	22.86	Yes	No	No	170	14	3.49	1.79	7.46	424	0.4	118	34.9	0.88	1.92	25.9	17.4	0.24	1.22	2.08	1.13	0.67	14.67	3.41	15.64	0.97	3.58	1.24	39.84	0.1459	-0.1459
Non-DVT group	43	50.5	1.55	21.02	No	No	No	62	14	2.68	2.03	6.29	211	0.21	126	37.2	0.92	0.54	24.5	17.3	0.08	1.4	3.65	1.12	1.01	11	13.61	9.8	1.83	1.7	0.97	30.79	0.00807	-0.00807
Non-DVT group	36	59	1.56	24.24	No	No	No	93	14	2.08	3.24	4.49	314	0.33	119	36	0.88	2.76	30.2	17.6	0.37	1.09	3.36	1.2	0.93	8.4	85.32	17	1.1	2.68	0.7	34.68	0.00172	-0.00172
Non-DVT group	30	60	1.56	24.65	No	No	No	80	15	2.65	2.79	5.77	281	0.3	138	40.6	0.87	0.85	29.2	17.3	0.09	1.47	3.06	1.24	0.86	10.3	4.03	7.3	2.1	1.61	0.62	36.84	0.00079	-0.00079
Non-DVT group	40	59	1.57	23.94	No	No	No	285	14	2.63	2.11	5.46	259	0.28	120	35.8	0.9	2.33	24.8	16.4	0.4	1.24	3.91	1	1.04	60.5	12.95	4.9	3.2	2.57	0.98	26.61	0.21845	-0.21845
Non-DVT group	42	57	1.65	20.94	No	No	No	171	14	3.38	1.77	8.26	228	0.25	116	33.9	0.96	1.01	28.2	16.9	0.24	1.7	3.24	1.28	0.89	23.7	5.05	18.4	0.83	3.61	0.8	38.09	0.01645	-0.01645
Non-DVT group	47	56.6	1.57	22.96	Yes	No	No	86	14	3.22	1.59	5.84	197	0.24	89	28.5	0.87	1.32	24.5	16.8	0.41	1.52	2.71	1.23	0.81	5.1	2.93	10.65	0.84	2.81	0.25	16.64	0.06714	-0.06714
Non-DVT group	31	50.5	1.56	20.75	No	No	No	188	14	3.39	2.22	4.69	308	0.35	133	39.9	0.91	1.42	26.2	17.3	0.09	1.84	2.21	1.3	0.65	4.6	6.13	49.5	1.54	67	1.13	25.64	0.00915	-0.00915
Non-DVT group	29	55	1.65	20.2	No	No	No	113	15	3.09	1.95	4.79	275	0.26	129	38.6	0.82	1.8	28.3	17.4	0.19	1.76	2.48	1.3	0.73	9.7	3.48	36.1	1.62	5.57	0.82	21.63	0.00195	-0.00195
Non-DVT group	43	54.7	1.6	21.37	No	No	No	144	14	5.2	1.33	4.59	335	0.35	84	31.1	0.89	1.86	24.9	16.7	0.19	0.91	1.53	1.03	0.71	5.7	5.6	5.8	0.96	6.51	0.79	28.64	0.02843	-0.02843
Non-DVT group	46	62.5	1.57	25.36	No	No	No	235	14	3	1.68	3.96	266	0.25	110	34.5	0.82	1.65	22.4	17.2	0.27	1.19	2.36	1.06	0.73	11.65	15.62	20.5	0.99	1.68	1.1	28.57	0.22751	-0.22751
Non-DVT group	50	55.4	1.6	21.64	No	No	No	85	14	2.86	1.25	4.74	315	0.28	117	36.1	0.94	0.74	25.8	17.7	0.76	1.25	2.86	1.13	0.9	10.7	7.23	4.6	0.65	2.84	1.58	34.51	0.04105	-0.04105
Non-DVT group	48	52	1.6	20.31	No	No	No	120	14	5.44	1.59	3.95	201	0.21	156	43.9	0.91	1.37	26.8	17.6	0.15	1.67	3.34	1.23	0.9	10.5	6.4	6.3	1.68	6.87	2.62	29.61	0.01593	-0.01593
Non-DVT group	39	59.9	1.63	22.55	No	No	No	138	13	5.05	2	4.84	253	0.25	114	35.6	0.84	0.98	27.1	17.6	0.78	1.23	3.16	1.02	0.83	425.2	56.62	22.64	1.54	5.54	0.8	23.72	0.06572	-0.06572
Non-DVT group	50	51.3	1.58	20.55	Yes	No	No	153	15	2.23	2.27	6.37	322	0.31	99	32	0.95	1.49	23.8	17.4	0.86	1.53	2.39	1.22	0.71	512	36.2	7.6	1.12	3.13	1.57	39.84	0.74396	-0.74396
Non-DVT group	48	54	1.55	22.48	Yes	No	No	330	14	3.98	2.11	7.44	223	0.24	136	40.3	0.98	1	25.9	17.4	0.19	1.21	3.13	1.09	0.9	4.9	5.6	9.8	0.69	3.68	1.1	30.79	0.6022	-0.6022
Non-DVT group	32	63.4	1.6	24.77	No	No	No	140	14	2.89	1.69	6.06	232	0.23	142	42.4	0.96	1.77	27.9	16.5	0.11	1.31	2.74	1.12	0.75	16.9	2.66	7.6	0.74	2.84	2.69	34.68	0.00417	-0.00417
Non-DVT group	25	47.5	1.58	19.03	No	No	No	87	14	2.69	0.99	6.39	256	0.3	97	30.4	0.89	2.91	25.1	17.6	0.11	1.37	1.57	1.04	0.6	35.7	23.72	4.2	0.66	2.29	1	26.61	0.00286	-0.00286
Non-DVT group	30	57	1.66	20.69	No	No	No	105	14	2.63	1.48	4.46	251	0.28	91	29.8	1.01	0.71	25.9	16.8	0.34	1.34	2.61	1.11	0.72	53.61	16.65	9	1.32	3.37	0.7	32.81	0.00652	-0.00652
Non-DVT group	45	67.7	1.58	27.12	No	No	No	165	14	4.65	1.99	5.44	266	0.25	118	37.8	0.91	1.78	25.6	18	0.2	1.27	3.03	1.11	0.9	15.62	11.63	18.3	1.4	4.3	0.7	23.72	0.03241	-0.03241
Non-DVT group	32	50.6	1.68	17.93	No	No	No	121	12	2.89	1.91	6.24	252	0.26	126	37.8	0.98	1.91	25.8	17.5	0.28	1.56	2.84	1.18	0.76	10.62	16.71	6.2	2.64	1.02	0.62	39.84	0.02451	-0.02451
Non-DVT group	28	47.8	1.53	20.42	No	No	No	179	14	3.32	1.39	5.39	226	0.26	115	37.3	0.89	0.92	23.3	18	0.23	1.56	2.18	1.22	0.66	17.65	5.6	8.5	1.36	2.07	0.98	30.79	0.01814	-0.01814
Non-DVT group	34	53.8	1.58	21.55	No	No	No	70	14	3.09	1.97	8.06	209	0.2	129	37.6	0.94	4.1	28.4	17.7	0.15	1.61	2.63	1.17	0.72	9.8	9.4	8.4	0.97	2.23	0.8	34.68	0.00173	-0.00173
Non-DVT group	51	68	1.57	27.59	Yes	No	No	105	13	2.67	1.12	3.59	284	0.29	117	35.6	0.96	1.04	25.7	18.1	0.24	1.54	2.76	1.18	0.76	9.4	5.57	18.63	1.84	3.51	1.5	28.65	0.11955	-0.11955
Non-DVT group	33	56.7	1.64	21.08	No	No	No	110	14	5.17	1.87	4.26	136	0.15	139	40.4	1.03	0.89	26.5	18.1	0.12	1.47	2.9	1.18	0.78	5.6	9.5	10.3	2.3	4.56	0.6	42.9	0.00487	-0.00487
Non-DVT group	46	72.3	1.68	25.62	No	Yes	No	101	14	2.26	1.42	13.57	273	0.28	118	36.1	0.9	1.14	25.2	16.5	0.38	1.06	2.3	1.04	0.7	4.5	4.03	14.68	1.84	5.4	2.51	23.51	0.02863	-0.02863
Non-DVT group	45	53.4	1.58	21.39	No	No	No	125	14	8.17	2	5.92	253	0.27	119	36.2	0.91	0.74	27.4	17.7	0.24	1.08	3.29	1.27	0.93	11.63	12.95	4.4	0.54	2.52	0.6	15.39	0.00824	-0.00824
Non-DVT group	39	65	1.6	25.39	No	No	No	92	14	1.94	1.62	3.9	292	0.32	135	40.2	0.87	1.84	26.5	18.3	0.17	1.37	3.06	1.1	0.78	11.6	5.05	3.8	1.08	2.06	0.5	20.69	0.0059	-0.0059
Non-DVT group	55	52.3	1.58	20.95	Yes	Yes	No	105	14	1.92	1.03	6.1	196	0.23	116	34.6	0.92	0.69	30.9	17.4	0.54	1.5	2.64	1.16	0.8	64.1	2.93	5	5	1.28	2.35	16.16	0.04746	-0.04746
Non-DVT group	44	61	1.55	25.39	No	No	No	279	14	3.72	1.29	7.4	170	0.19	89	29.7	0.89	1.79	24.3	17.4	0.17	1.54	2.99	1.3	0.84	8.4	6.13	7.2	0.5	4.09	2	17.62	0.12813	-0.12813
Non-DVT group	35	65	1.62	24.77	No	No	No	95	14	4.33	1.81	5.67	290	0.28	132	38	0.95	0.85	25.4	18.5	1.2	1.6	3.69	1.2	0.96	28.4	3.48	15.62	4.9	3.68	1.58	28.65	0.03012	-0.03012
Non-DVT group	48	59	1.58	23.63	No	No	No	140	14	2.54	1.76	4.71	284	0.3	125	37	0.93	1.23	25.8	17.5	0.22	1.51	2.18	1.32	0.6	15.64	15.92	21.2	1.47	2.23	0.97	61.59	0.02724	-0.02724
Non-DVT group	42	58	1.59	22.94	No	No	No	124	14	2.64	1.82	3.49	318	0.33	128	37.4	0.91	0.95	28.4	17.2	0.2	1.15	2.49	1.04	0.78	22.64	15.66	23.4	1.65	2.2	3.2	36.2	0.00865	-0.00865
Non-DVT group	32	54	1.52	23.37	No	No	No	145	14	4.68	2.78	12.04	202	0.22	139	41.2	0.82	1.45	28.5	17.5	0.26	1.17	2.81	1.23	0.76	29.64	10.63	9.6	1.54	5.4	2.51	19.54	0.00291	-0.00291
Non-DVT group	27	61	1.6	23.83	No	No	No	70	14	1.95	1.74	5.97	240	0.25	135	39.8	0.89	3.24	24.8	16.4	0.2	1.38	3.1	1.14	0.83	24.4	15.69	9.9	5.4	3.19	0.8	50.29	0.00305	-0.00305
Non-DVT group	39	53.5	1.53	22.85	No	No	No	145	14	3.18	1.84	5.15	298	0.33	134	40	0.81	1.68	26	17.2	0.2	1.14	3.3	1.05	0.92	9.4	3.61	17.3	0.5	2.46	0.57	29.61	0.01452	-0.01452
Non-DVT group	42	60	1.63	22.58	No	No	No	176	14	2.38	1.59	6.6	372	0.34	81	30.2	1.12	1.22	20.8	17.2	0.29	2.03	2.22	1.42	0.68	22.4	6.56	5.2	6.5	2.54	2.9	32.65	0.10425	-0.10425
Non-DVT group	46	76	1.55	31.63	No	No	No	175	14	3.12	2.23	4.86	180	0.21	118	35.7	0.99	0.67	27.4	17	0.3	1.39	3.07	1.2	0.82	7.8	7.4	5.8	0.54	1.47	2	10.62	0.02047	-0.02047
